# Supplementary material for: Proteomic and Metabolomic Profiles of T Cell-Derived Exosomes Isolated from Human Plasma
Source: MDPI journal article supplement (doi:10.3390/cells11121965), 2022-06-18
Supplement: s1 [file s1]

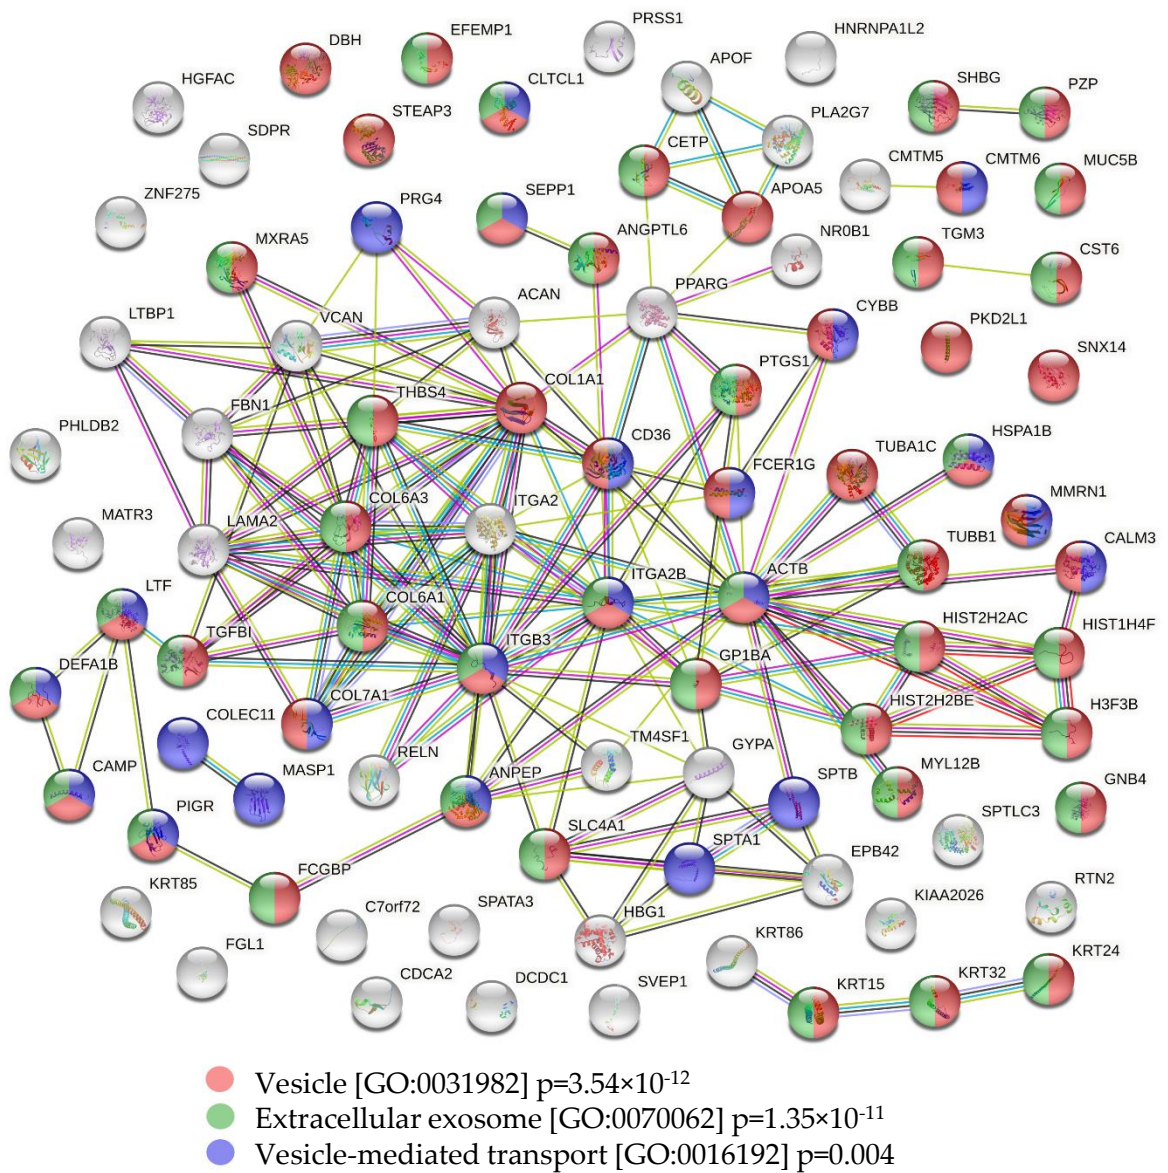

**Figure S1:** The functional network of proteins characteristic for the CD3(+)exo fraction that were not detected in CD3+/CD4+/CD8- T cells. Proteins that were associated with the selected biological processes are color-coded, along with the significance of the process overrepresentation. The putative interactions between the proteins and associated processes were found using the STRINGdb database.
