# Supplementary material for: Proteomic and Metabolomic Profiles of T Cell-Derived Exosomes Isolated from Human Plasma
Source: Cells. 2022 Jun 18;11(12):1965. doi: 10.3390/cells11121965 (PMC9222142; doi:10.3390/cells11121965)
Supplement: Supplementary file 1 [file cells-11-01965-s001.zip › Supplementary Files/cells-1763523-supplementary_R.xlsx]

## Sheet: Table S1
Table S1. Proteins identified in CD3(+) and CD3(-) exosomes from plasma of healthy donors
UniProt Accession	Protein Description	Normalized abundance of proteins identified in CD3(+) exosomes from plasma of individual healthy donors.										Normalized abundance of proteins identified in CD3(-) exosomes from plasma of individual healthy donors.										putative plasma component	number of measurements >LOD		median value		CD3(+)exo/CD3(-)exo (median values)	significance of differences CD3(+)exo vs. CD3(-)exo
		CD3+_1	CD3+_2	CD3+_3	CD3+_4	CD3+_5	CD3+_6	CD3+_7	CD3+_8	CD3+_9	CD3+_10	CD3-_1	CD3-_2	CD3-_3	CD3-_4	CD3-_5	CD3-_6	CD3-_7	CD3-_8	CD3-_9	CD3-_10		CD3(+)exo	CD3(-)exo	CD3(+)exo	CD3(-)exo		Fisher p-value	Fisher q-value	Wicoxon p-value	Wilcoxon q-value
P30273	1 affinity immunoglobulin epsilon receptor subunit gamma OS=Homo sapiens OX=9606 GN=FCER1G PE=1 SV=1	4.79527e+06	8.70892e+06		6.26821e+06		1.32797e+07	6.1201e+06	2.95773e+06	7.79467e+06	9.87969e+06	4.64113e+06	2.20181e+06	4.91536e+06	2.29276e+06	4.81287e+06	1.34647e+06	1.58789e+06	409796	3.65604e+06	6.3334e+06		8	10	703.144	297.44	2.36399	0.473684	0.938431	0.140316	0.201261
P31946	14-3-3 protein beta/alpha OS=Homo sapiens OX=9606 GN=YWHAB PE=1 SV=3									826921		343141	467441	455813	666299	572983		989169	244659	2.21818e+06	994879		1	9	82.6921	134.647	0.614142	0.00109333	0.01435	0.00214621	0.0067725
P62258	14-3-3 protein epsilon OS=Homo sapiens OX=9606 GN=YWHAE PE=1 SV=1					559550		2.13687e+06	1.7457e+06			947474	495359	758714	264930	671835	1.36418e+06	181383	597193	2.78028e+06	995317		3	10	174.57	66.6299	2.61999	0.00309598	0.0390093	0.0277192	0.0550507
Q04917	14-3-3 protein eta OS=Homo sapiens OX=9606 GN=YWHAH PE=1 SV=4	2.01375e+06	1.66254e+06	840364	1.0034e+06	1.31106e+06	1.1394e+06	1.57601e+06	3.11115e+06	7.05933e+06	4.37507e+06	1.80042e+06	2.21964e+06	2.89681e+06	2.31105e+06	2.73735e+06	1.1955e+06	2.71782e+06	1.29326e+06	7.36264e+06	5.89752e+06		9	10	161.928	132.872	1.21867	1	1.11307	0.247451	0.326865
P61981	14-3-3 protein gamma OS=Homo sapiens OX=9606 GN=YWHAG PE=1 SV=2	1.19379e+07	9.09859e+06	8.21665e+06	3.55023e+07	8.31212e+07	1.39499e+07	2.93977e+07		1.77164e+07	3.40549e+07	802617	2.81092e+07	1.06633e+06	7.04583e+06	2.55433e+06	921002	1.12542e+07	9.50577e+06	8.57187e+07	1.22075e+06		9	10	1771.64	263.608	6.72073	1	1.10915	0.105122	0.158802
P63104	14-3-3 protein zeta/delta OS=Homo sapiens OX=9606 GN=YWHAZ PE=1 SV=1	5.38963e+06	1.47191e+06	2.34401e+06	2.4449e+07	6.09708e+06	2.54115e+06	1.40345e+07	4.97602e+07	3.61782e+07	1.13255e+07	2.20232e+07	1.54434e+07	1.87e+07	1.58188e+07	2.05765e+07	1.55065e+07	2.91719e+07	9.75096e+06	6.52585e+07	3.95498e+07		8	10	871.13	1547.5	0.562928	0.473684	0.932566	0.0756616	0.12493
Q9C0C2	182 kDa tankyrase-1-binding protein OS=Homo sapiens OX=9606 GN=TNKS1BP1 PE=1 SV=4	1.82097e+07	7.77242e+06	1.40727e+07	2.39967e+06	7.41452e+06		1.28467e+07		2.57349e+07	8.73069e+06												8	0	1078.87	1963.82	0.549374	0.000714456	0.0187545	0.000751179	0.00328208
P62841	40S ribosomal protein S15 OS=Homo sapiens OX=9606 GN=RPS15 PE=1 SV=2			2.22735e+06	1.06013e+07								114298										2	1	641.433	11.4298	56.1192	1	1.25
P62244	40S ribosomal protein S15a OS=Homo sapiens OX=9606 GN=RPS15A PE=1 SV=2			1.61711e+06	7.50959e+06								100849		121976					59094	35617.9		2	4	456.335	10.0849	45.2492	0.628483	0.925103
P62266	40S ribosomal protein S23 OS=Homo sapiens OX=9606 GN=RPS23 PE=1 SV=3			1.93655e+06	1.59943e+07								449859										2	1	896.544	10.0849	88.8994	1	1.24506
P61247	40S ribosomal protein S3a OS=Homo sapiens OX=9606 GN=RPS3A PE=1 SV=2			3.53979e+06	1.813e+07	54881.6																	3	0	353.979	44.9859	7.86868	0.210526	0.552632
P08865	40S ribosomal protein SA OS=Homo sapiens OX=9606 GN=RPSA PE=1 SV=4			1.49248e+06	8.08344e+06																		2	0	478.796	0.01	1000	0.473684	0.926773
P10809	60 kDa heat shock protein, mitochondrial OS=Homo sapiens OX=9606 GN=HSPD1 PE=1 SV=2	7353.05		8.25492e+06	6.39644e+07	98663	471526				23243.1		1.58812e+06						44192.2				6	2	28.5095	81.6156	0.349314	0.169802	0.465111	0.09616	0.149232
P05388	60S acidic ribosomal protein P0 OS=Homo sapiens OX=9606 GN=RPLP0 PE=1 SV=1			1.8922e+06	8.93292e+06																		2	0	541.256	81.6156	6.63177	0.473684	0.921053
P62913	60S ribosomal protein L11 OS=Homo sapiens OX=9606 GN=RPL11 PE=1 SV=2	19104.6		2.05737e+06	1.15238e+07		922769				162045												5	0	92.2769	0.01	1000	0.0325077	0.157538
P62917	60S ribosomal protein L8 OS=Homo sapiens OX=9606 GN=RPL8 PE=1 SV=2			1.44372e+06	7.44181e+06																		2	0	444.276	0.01	1000	0.473684	0.915402
P32969	60S ribosomal protein L9 OS=Homo sapiens OX=9606 GN=RPL9 PE=1 SV=1												178073						4014.86				0	2	0.01	9.1044	0.001	0.473684	0.90982
Q86V21	Acetoacetyl-CoA synthetase OS=Homo sapiens OX=9606 GN=AACS PE=1 SV=1	4.39941e+06						1.67968e+06		1.56529e+06		255603	2.83132e+06	536286	1.05412e+07	167514		4.46032e+06		1.26324e+06			3	7	167.968	53.6286	3.13205	0.178895	0.47756	0.169731	0.236291
P60709	Actin, cytoplasmic 1 OS=Homo sapiens OX=9606 GN=ACTB PE=1 SV=1	2.93065e+07	1.00163e+07	7.04099e+07	3.09908e+08	4.79783e+07	9.7199e+06	3.98164e+07	1.05204e+08	1.74972e+08	7.17954e+07	4.3194e+07	6.92636e+07	4.61611e+07	7.97168e+07	2.97213e+07	1.01394e+07	8.83876e+07	2.61344e+07	2.6638e+08	8.7491e+07		10	10	5919.41	2613.44	2.26499			0.970512	0.977396
P63267	Actin, gamma-enteric smooth muscle OS=Homo sapiens OX=9606 GN=ACTG2 PE=1 SV=1	271237	440369	223160	960132	55700.9		50530.4	9.37319e+06		297150	660945	1.02823e+06	2.05147e+06	933075	907903	333007	2.47891e+06	987932	4.09487e+06	1.85545e+06		8	10	28.4193	711.712	0.039931	0.473684	0.904306	0.00672238	0.0161793
O15511	Actin-related protein 2/3 complex subunit 5 OS=Homo sapiens OX=9606 GN=ARPC5 PE=1 SV=3			2.19873e+06		826697		1.11496e+06		678739			282489		762270			611378	502021	727528			4	5	97.083	90.7903	1.06931	1	1.15809
Q15848	Adiponectin OS=Homo sapiens OX=9606 GN=ADIPOQ PE=1 SV=1					1.58604e+06		758921				7.34336e+06	4.35634e+06	6.3585e+06	8.92973e+06	9.27808e+06	9.26122e+06	1.45231e+07	2.10846e+07	1.16109e+07	3.23686e+06		2	10	117.248	635.85	0.184396	0.000714456	0.0173118	0.000110671	0.000952439
P43652	Afamin OS=Homo sapiens OX=9606 GN=AFM PE=1 SV=1			539603	3.25592e+06	1.09667e+06	341798	28468.4											272512			1	5	1	53.9603	892.973	0.0604277	0.140867	0.410862
P16112	Aggrecan core protein OS=Homo sapiens OX=9606 GN=ACAN PE=1 SV=3								332258			185494		382733	614443								1	3	33.2258	32.7623	1.01415	0.582043	0.890018
P02768	Albumin OS=Homo sapiens OX=9606 GN=ALB PE=1 SV=2	2.73999e+08	9.42058e+07	1.79712e+08	6.78363e+08	2.32645e+08	2.26584e+08	3.87141e+08	1.81841e+08	8.64354e+07	8.83103e+07	1.2738e+09	2.58148e+09	1.01311e+09	2.13549e+09	2.06568e+09	2.52284e+09	1.59996e+09	3.47287e+09	1.301e+09	1.39775e+09	1	10	10	20421.3	139775	0.146101			1.08251e-05	0.000146396
P11766	Alcohol dehydrogenase class-3 OS=Homo sapiens OX=9606 GN=ADH5 PE=1 SV=4			1.07921e+06	6.16338e+06																	1	2	0	362.129	183282	0.001	0.473684	0.898859
P02763	Alpha-1-acid glycoprotein 1 OS=Homo sapiens OX=9606 GN=ORM1 PE=1 SV=1												2.42146e+06		1.82279e+06			1.54076e+06	1.42854e+06	571479		1	0	5	0.01	154.076	0.001	0.0325077	0.155151
P19652	Alpha-1-acid glycoprotein 2 OS=Homo sapiens OX=9606 GN=ORM2 PE=1 SV=2	2.62875e+06	328455	4.92023e+06		928318		1.63935e+06	1.56923e+06	893869	979238	3.96686e+06	9.49016e+06	1.46854e+06	4.9878e+06	7.64166e+06	1.81866e+06	7.74924e+06	6.2236e+06	4.63347e+06	5.07716e+06	1	6	10	127.424	396.686	0.32122	0.0866873	0.293618	0.000725281	0.00321843
P01011	Alpha-1-antichymotrypsin OS=Homo sapiens OX=9606 GN=SERPINA3 PE=1 SV=2				229543	974772		710506	5.74704e+06		380765	2.78445e+07	5.01429e+06	2.52701e+07	6.5957e+06	1.77266e+07	1.45481e+07	5.87101e+06	1.69872e+07	4.57463e+06	2.81921e+07	1	5	10	71.0506	640.965	0.110849	0.0325077	0.152835	0.000296925	0.00153321
P01009	Alpha-1-antitrypsin OS=Homo sapiens OX=9606 GN=SERPINA1 PE=1 SV=3	1.49282e+08	1.88326e+07	5.92908e+07	6.58638e+07	4.10187e+07	5.72777e+07	1.23107e+08	5.7381e+07	4.5566e+07	6.02906e+07	2.13844e+08	1.87727e+08	1.49635e+08	1.90151e+08	2.40292e+08	1.9735e+08	1.92515e+08	3.6003e+08	1.68452e+08	2.19179e+08	1	10	10	5833.59	8891.33	0.656099			1.08251e-05	0.000146396
P04217	Alpha-1B-glycoprotein OS=Homo sapiens OX=9606 GN=A1BG PE=1 SV=4			2.02835e+06	4.07869e+06	966349	9.36274e+06				2.25553e+06		1.82128e+06		996218		867601	796348	3.14681e+06	1.05592e+06	103023	1	5	7	225.553	16845.2	0.0133897	0.649917	0.943427	0.937749	0.954555
P08697	Alpha-2-antiplasmin OS=Homo sapiens OX=9606 GN=SERPINF2 PE=1 SV=3	2.31167e+10	3.51514e+10	2.70841e+10	2.25271e+10	1.35792e+10	8.82833e+09	2.22337e+10	1.79702e+08	3.7765e+10	4.09967e+10	7.88072e+06	1.05836e+07	6.1073e+06	1.26742e+07	5.96621e+06	6.79075e+06	9.67731e+06	1.034e+07	1.70636e+07	1.08641e+07	1	10	10	2.28219e+06	610.73	1000			1.08251e-05	0.000146396
P02765	Alpha-2-HS-glycoprotein OS=Homo sapiens OX=9606 GN=AHSG PE=1 SV=2	899769		754677		1.03498e+06			105217	751434		210639	1.13723e+07	1.08498e+07	6.45272e+06	6.86061e+06	6788551	5.68008e+06	9.42636e+06	2.93693e+06	2.24959e+06	1	5	10	75.4677	737.066	0.102389	0.0325077	0.150587	0.000528985	0.00238463
P01023	Alpha-2-macroglobulin OS=Homo sapiens OX=9606 GN=A2M PE=1 SV=3	6.99485e+08	3.61388e+08	3.85265e+08	5.15013e+08	2.68199e+08	6.42907e+08	3.361e+08	4.91734e+08	6.94159e+08	6.03422e+08	1.42998e+10	1.36554e+10	4.53627e+09	1.95206e+10	1.34145e+10	7.40316e+09	1.07476e+10	1.35275e+10	9.9341e+09	8.45899e+09	1	10	10	50337.3	227382	0.221378			1.08251e-05	0.000146396
P12814	Alpha-actinin-1 OS=Homo sapiens OX=9606 GN=ACTN1 PE=1 SV=2																			26412.3	16670		0	2	0.01	1.03408e+06	0.001	0.473684	0.893476
P06733	Alpha-enolase OS=Homo sapiens OX=9606 GN=ENO1 PE=1 SV=2	295159	233141	6.20502e+07	3.49505e+08	2.09599e+06	7.73511e+06	154596	2.14778e+06	58661.4	478889	278697	5.18979e+06		487914		34078	83293.4	2.33595e+06	280661	164018		10	8	128.744	22.1358	5.81611	0.473684	0.888158	0.10398	0.158765
P15144	Aminopeptidase N OS=Homo sapiens OX=9606 GN=ANPEP PE=1 SV=4	3.78783e+06	8.51265e+06	114675	7.26433e+06	4.40669e+06	2.25482e+07	3.07269e+06	2.38238e+06	5.20183e+06	4.91877e+06	1.72183e+06	2.16246e+06	420694	337449	2.11474e+06	817114	662627	3.56744e+06	2.45741e+06	8.40321e+06		10	10	466.273	73.9871	6.30209			0.0232306	0.047808
Q8NI99	Angiopoietin-related protein 6 OS=Homo sapiens OX=9606 GN=ANGPTL6 PE=1 SV=1					1.98081e+06	2.32084e+06	1.24755e+06	7.21169e+06	1.69499e+06	4.01694e+06	1.88021e+06	506210	1.41946e+06		1.32268e+06	1.13391e+06	472236	863125	1.63562e+06	1.63929e+06		6	9	215.083	141.946	1.51524	0.303406	0.697611	0.675273	0.76711
P01019	Angiotensinogen OS=Homo sapiens OX=9606 GN=AGT PE=1 SV=1	1.34525e+06	263157	2.59052e+06	598862	1.55245e+06		824117	3.74176e+06	2.82828e+06	540883	3.01205e+06	3.76994e+06	5.31126e+06	598236	2.78277e+06	3.87048e+06	1.81879e+06	4.94949e+06	1.36414e+07	3.08983e+06	1	9	10	134.525	181.879	0.739639	1	1.10526	0.00728456	0.017385
P16157	Ankyrin-1 OS=Homo sapiens OX=9606 GN=ANK1 PE=1 SV=3	265858		246114					3.91818e+06	683275	351599		1.62497e+07	375221	7.07233e+06	278814	271571	728773	722464	186256	251150		5	9	35.1599	278.277	0.126349	0.140867	0.407092	0.0780735	0.12743
P50995	Annexin A11 OS=Homo sapiens OX=9606 GN=ANXA11 PE=1 SV=1											68295		165161		83851.7					114769		0	4	0.01	27.1571	0.001	0.0866873	0.290495
P07355	Annexin A2 OS=Homo sapiens OX=9606 GN=ANXA2 PE=1 SV=2	522051	8.96114e+06		1.87495e+06	2.69469e+06	1.01863e+06				863555		236511		485639			772702	174144	278994			6	5	144.679	17.4144	8.30803	1	1.15385	0.142601	0.202493
P08758	Annexin A5 OS=Homo sapiens OX=9606 GN=ANXA5 PE=1 SV=2				1.012e+06		4.21009e+06				2.51471e+06	1.85721e+06		1.2233e+06	19623.3	1.93782e+06	1.70343e+06				2.5238e+06		3	6	251.471	77.2702	3.25444	0.36985	0.746812	0.341312	0.425144
P20073	Annexin A7 OS=Homo sapiens OX=9606 GN=ANXA7 PE=1 SV=3	895976			2.68206e+06			1.72322e+06	6.04721e+06	825130			2.3362e+06		2.07842e+06	68527.9		1.97411e+06	619173	2.66957e+06	483658		5	7	172.322	185.721	0.927855	0.649917	0.9391	0.754738	0.818113
P58335	Anthrax toxin receptor 2 OS=Homo sapiens OX=9606 GN=ANTXR2 PE=1 SV=5	6.53379e+06			2.4738e+06			869931	3.8921e+06				383769					208352	520777	658777			4	4	318.295	61.9173	5.14065	1	1.39381
P01008	Antithrombin-III OS=Homo sapiens OX=9606 GN=SERPINC1 PE=1 SV=1	2.40665e+07	6.738e+06	3.18194e+07	1.86882e+07	1.12877e+07	1.34392e+07	2.13932e+07	2.62474e+07	9.90737e+06	2.1228e+07	6.38863e+07	9.47229e+07	9.202e+07	1.20414e+08	8.6009e+07	6.24203e+07	5.00768e+07	7.06473e+07	4.42202e+07	4.86589e+07	1	10	10	1995.81	5624.85	0.354819			1.08251e-05	0.000146396
P02647	Apolipoprotein A-I OS=Homo sapiens OX=9606 GN=APOA1 PE=1 SV=1	2.35413e+09	2.66832e+08	2.53634e+09	5.35072e+08	1.98577e+09	1.10045e+09	2.57627e+09	2.50289e+09	8.56209e+08	9.99128e+08	1.45988e+09	1.1906e+09	2.02575e+09	7.36841e+08	2.16074e+09	2.20384e+09	1.22544e+09	3.11847e+09	1.59404e+09	1.52689e+09	1	10	10	154311	42862.7	3.60012			0.739364	0.817041
P02652	Apolipoprotein A-II OS=Homo sapiens OX=9606 GN=APOA2 PE=1 SV=1	1.73346e+09	1.47664e+09	1.84954e+09	3.01242e+09	6.12363e+08	3.75559e+09	1.47647e+09	1.19601e+09	1.31193e+09	1.07506e+09	2.18241e+08	3.53696e+08	1.90314e+08	1.59157e+08	2.38028e+08	3.39438e+08	1.59349e+08	3.20315e+08	2.84857e+08	2.73309e+08	1	10	10	147656	54526.8	2.70794			1.08251e-05	0.000146396
P06727	Apolipoprotein A-IV OS=Homo sapiens OX=9606 GN=APOA4 PE=1 SV=4	2.49111e+08	4.36211e+07	3.85335e+08	1.99926e+08	3.82544e+08	5.65151e+08	2.74932e+08	1.46701e+08	1.43643e+08	1.91728e+08	4.816e+07	7.82983e+07	5.66572e+07	9.12171e+07	5.2097e+07	3.80814e+07	7.14729e+07	1.11846e+08	4.32155e+07	4.12199e+07	1	10	10	22451.8	13550.1	1.65694			0.000487129	0.00226794
Q6Q788	Apolipoprotein A-V OS=Homo sapiens OX=9606 GN=APOA5 PE=1 SV=1		1.53162e+06	1.65863e+06	2.94725e+06			1.45367e+06			2.07305e+06	102953	4.69042e+06		323789			994856		909707			5	5	165.863	4321.55	0.0383804	1	1.38767
P04114	Apolipoprotein B-100 OS=Homo sapiens OX=9606 GN=APOB PE=1 SV=2	2.71216e+09	1.52006e+09	2.19862e+09	6.22507e+09	1.09688e+10	4.67381e+09	7.3913e+09	2.63696e+10	5.28003e+09	4.08005e+09	1.09517e+10	1.1433e+10	6.89359e+09	2.23414e+09	9.31232e+09	1.14358e+10	6.21529e+09	5.54531e+09	1.44146e+10	1.48337e+10	1	10	10	497692	621529	0.800754			0.088973	0.142759
P02654	Apolipoprotein C-I OS=Homo sapiens OX=9606 GN=APOC1 PE=1 SV=1	1.62575e+08	1.12749e+08	2.09332e+08	1.14213e+08	8.83198e+07	5.27846e+07	8.1592e+07	2.89427e+07	8.85936e+06	2.06519e+07	4.70824e+07	4.8442e+08	8.69931e+07	9.87651e+07	3.34738e+07	9.12696e+06	2.49845e+07	2.11169e+07	7.72179e+06	1.3269e+07	1	10	10	8495.59	135928	0.0625007			0.217563	0.291452
P02655	Apolipoprotein C-II OS=Homo sapiens OX=9606 GN=APOC2 PE=1 SV=1	7.8615e+08	2.42649e+08	3.06128e+08	3.55908e+08	1.59628e+08	7.3221e+07	1.0951e+08	3.20858e+07	8.42914e+07	3.98314e+07	3.41817e+08	1.3684e+09	3.60163e+08	3.60331e+08	2.59514e+08	3.58358e+08	7.86097e+07	6.92863e+07	1.09148e+08	1.32942e+08	1	10	10	13456.9	9287.91	1.44886			0.247451	0.325352
P02656	Apolipoprotein C-III OS=Homo sapiens OX=9606 GN=APOC3 PE=1 SV=1	5.36556e+08	2.88023e+08	3.8114e+08	1.24543e+08	1.16785e+08	1.44225e+07	1.35425e+08	4.90059e+07	7.12684e+07	5.39422e+07	3.54832e+08	1.68028e+09	4.5943e+08	2.64259e+08	1.55041e+08	9.74309e+07	5.42127e+07	7.55641e+07	1.61732e+08	1.82105e+08	1	10	10	12066.4	22081	0.54646			0.247451	0.323853
P55056	Apolipoprotein C-IV OS=Homo sapiens OX=9606 GN=APOC4 PE=1 SV=1	6.16204e+07	2.09712e+07	3.73019e+07	2.20451e+06	2.74848e+07	4.27073e+06	2.4649e+07	4.45178e+07	4.08772e+07	9.44215e+06	1.0796e+08	4.53693e+08	1.25266e+08	7.17415e+07	1.84592e+08	1.45304e+08	4.77528e+07	8.6155e+07	2.11134e+08	6.89512e+07	1	10	10	2606.69	15017.3	0.17358			2.16502e-05	0.000236487
P05090	Apolipoprotein D OS=Homo sapiens OX=9606 GN=APOD PE=1 SV=1	6.35369e+07	4.69157e+07	4.39438e+07	7.95012e+07	5.20651e+07	6.04858e+07	7.99117e+07	4.22572e+07	2.48065e+07	2.10885e+07	2.59742e+07	1.38087e+08	2.28978e+07	5.24288e+07	3.29998e+07	6.20365e+07	2.67979e+07	2.40727e+07	3.2004e+07	2.15881e+07	1	10	10	4949.04	6549.39	0.755649			0.247451	0.320895
P02649	Apolipoprotein E OS=Homo sapiens OX=9606 GN=APOE PE=1 SV=1	1.67379e+09	1.49222e+09	1.06823e+09	1.52646e+09	1.2212e+09	3.80846e+08	1.04244e+09	1.29703e+09	5.96127e+08	7.14325e+08	1.34061e+09	4.40694e+09	1.35912e+09	1.42823e+09	7.57184e+08	6.83104e+08	6.32463e+08	1.41148e+09	1.60548e+09	1.29498e+09	1	10	10	114471	38527.5	2.97116			0.481251	0.56948
Q13790	Apolipoprotein F OS=Homo sapiens OX=9606 GN=APOF PE=1 SV=2	2.11526e+06	968997	1.22845e+06	234017	2.35416e+06		1.41264e+06	603436	597956	633942	1.10483e+06	2.90097e+06	1.35938e+06	1.49546e+06	1.44454e+06	5.07294e+06	1.07944e+06	1.36654e+06	1.27327e+06	1.99025e+06		9	10	96.8997	31876.8	0.001	1	1.1014	0.0451546	0.0786742
O14791	Apolipoprotein L1 OS=Homo sapiens OX=9606 GN=APOL1 PE=1 SV=5	5.40852e+08	2.41463e+08	4.31532e+08	3.54032e+08	1.01398e+09	1.22248e+09	5.46787e+08	3.30087e+08	6.90991e+08	2.77811e+08	1.68666e+08	1.53729e+08	2.04956e+08	8.25356e+07	3.90846e+08	2.69045e+08	1.18832e+08	3.66196e+08	4.35834e+08	3.92092e+08	1	10	10	48619.2	4380.43	11.0992			0.0146896	0.03311
O95445	Apolipoprotein M OS=Homo sapiens OX=9606 GN=APOM PE=1 SV=2	4.86304e+07	1.13148e+07	1.87336e+07	4.616e+07	1.61886e+07	3.07272e+07	3.19971e+07	4.97623e+07	1.31514e+07	1.91013e+07	2.21156e+07	6.74642e+07	1.16492e+07	3.38901e+07	9.60203e+06	2.62011e+07	2.13162e+07	1.22206e+07	2.20388e+07	2.03125e+07	1	10	10	2491.43	7499.99	0.33219			0.684211	0.774166
P08519	Apolipoprotein(a) OS=Homo sapiens OX=9606 GN=LPA PE=1 SV=1	1.05136e+07	6.26019e+07	9.95805e+07	6.30047e+07	2.07523e+07	9.16318e+07	6.42453e+08	4.71603e+09	7.34851e+06	4.57881e+08	1.88033e+07	1.6853e+08	9.79684e+07	8.06876e+06	4.84126e+07	7.71304e+07	1.54046e+08	4.65046e+08	6.25066e+06	4.94941e+08	1	10	10	7731.83	2415.83	3.20048			0.853428	0.904379
P06576	ATP synthase subunit beta, mitochondrial OS=Homo sapiens OX=9606 GN=ATP5F1B PE=1 SV=3			1.52473e+06	7.55724e+06								202769		52412.7			17118.2					2	3	454.099	4841.26	0.0937975	1	1.30705
Q08211	ATP-dependent RNA helicase A OS=Homo sapiens OX=9606 GN=DHX9 PE=1 SV=4			1.11527e+06	7.72338e+06	16787.3						5490.04	169669		20810.3	7268.05			26691.3				3	5	111.527	2.37508	46.9573	0.649917	0.934812
O75882	Attractin OS=Homo sapiens OX=9606 GN=ATRN PE=1 SV=2	3.86182e+06	2.10621e+07	1.25206e+07	3.30972e+07		2.99927e+07	7.86177e+06	1.7827e+07	7.94826e+06	2.77044e+07	1.76372e+06	745030	612407	803097	2.35495e+06	979413	371838	598262		1.44033e+06	1	9	9	1782.7	60.5335	29.4498	1	1.38158	0.00106086	0.00391278
P02730	Band 3 anion transport protein OS=Homo sapiens OX=9606 GN=SLC4A1 PE=1 SV=3	3.9205e+06	2.03215e+07	7.93096e+06	2.92121e+07	2.68645e+06		1.27305e+07	1.16938e+07	7.1806e+06	7.60167e+06	5.25081e+06	2.42391e+08	1.79321e+06	1.81238e+07	3.43607e+06	1.6694e+06	1.72912e+07	8.93038e+06	4.49034e+06	5.9672e+06		9	10	793.096	179.321	4.42277	1	1.09756	0.739364	0.813874
P51572	B-cell receptor-associated protein 31 OS=Homo sapiens OX=9606 GN=BCAP31 PE=1 SV=3		562995									240299									314676		1	2	56.2995	487.057	0.115591	1	1.24016
P02749	Beta-2-glycoprotein 1 OS=Homo sapiens OX=9606 GN=APOH PE=1 SV=3	1.22847e+06			3.4086e+06	1.9698e+06			1.05334e+06			2.97163e+06	2.69193e+07	1.06536e+06	1.05407e+07	3.10556e+06	4.77944e+06	1.38002e+06	5.85231e+06	3.52752e+06	2.81118e+06	1	4	10	159.914	303.859	0.526275	0.0108359	0.0775753	0.00147674	0.00517771
P61769	Beta-2-microglobulin OS=Homo sapiens OX=9606 GN=B2M PE=1 SV=1						2.14651e+06	662751	8.61111e+06										186411				3	1	214.651	310.556	0.691182	0.582043	0.885718
P31939	Bifunctional purine biosynthesis protein ATIC OS=Homo sapiens OX=9606 GN=ATIC PE=1 SV=3			1.30185e+06	7.22437e+06																		2	0	426.311	18.6411	22.8694	0.473684	0.882903
P04003	C4b-binding protein alpha chain OS=Homo sapiens OX=9606 GN=C4BPA PE=1 SV=2	5.99683e+08	7.97983e+07	1.52255e+08	4.37475e+08	2.25792e+08	7.509e+07	2.272e+08	1.66404e+08	1.78234e+08	2.11499e+08	1.26264e+09	1.08327e+09	1.30239e+09	1.57986e+09	1.24311e+09	1.40406e+09	1.4457e+09	1.13077e+09	7.54103e+08	1.00951e+09	1	10	10	19486.7	125288	0.155536			1.08251e-05	0.000146396
P20851	C4b-binding protein beta chain OS=Homo sapiens OX=9606 GN=C4BPB PE=1 SV=1	2.03273e+07	4.38237e+06	5.2255e+06	2.03129e+07	6.54454e+06	1.17428e+07	1.18326e+07	1.45397e+07	7.58783e+06	1.15319e+07	7.57564e+07	5.80148e+07	8.45886e+07	1.03944e+08	7.76824e+07	1.22042e+08	1.07543e+08	8.85509e+07	2.61796e+07	5.4247e+07	1	10	10	1163.73	43807.3	0.0265649			1.08251e-05	0.000146396
Q9HCU4	Cadherin EGF LAG seven-pass G-type receptor 2 OS=Homo sapiens OX=9606 GN=CELSR2 PE=1 SV=1	260691	273122	1.05908e+06		47136.3		36714	190922	2.53154e+06	158039	2.59347e+07	2.22475e+07	1.71649e+07	1.34373e+07	2.48123e+07	1.32242e+07	2.87044e+07	5.53173e+07	1.74259e+07	4.72918e+07		8	10	22.5806	5076.94	0.001	0.473684	0.877709	0.000181651	0.00114642
Q9NP80	Calcium-independent phospholipase A2-gamma OS=Homo sapiens OX=9606 GN=PNPLA8 PE=1 SV=1	1.58929e+06	536932		581489		912090	6.0621e+06				5.39382e+06	2.20131e+06	2.8007e+06	7.01517e+06	4.06266e+06	1.04164e+06	5.16311e+06	2.53523e+06	5.68341e+06	2.11832e+06		5	10	91.209	1011.97	0.0901301	0.0325077	0.148405	0.00262432	0.00752834
P0DP25	Calmodulin-3 OS=Homo sapiens OX=9606 GN=CALM3 PE=1 SV=1			1.96866e+06	7.35901e+06	15111.2																	3	0	196.866	343.168	0.573672	0.210526	0.548064
P27824	Calnexin OS=Homo sapiens OX=9606 GN=CANX PE=1 SV=2	39980.5	164570	116610	3.1665e+06							860820	103627	3.40912e+06		1.57979e+06	1.02642e+06	58482.2	54794.8	955841	782617		7	10	14.059	86.082	0.163321	0.210526	0.543572	0.0277192	0.0546684
P15169	Carboxypeptidase N catalytic chain OS=Homo sapiens OX=9606 GN=CPN1 PE=1 SV=1	1.56914e+06		652584					442554	1.72043e+06		6.68749e+06	5.86992e+06	5.50563e+06	2.17157e+06	5.54268e+06	6.37227e+06	6.51451e+06	7.21967e+06	5.46475e+06	4.47576e+06		4	10	111.086	340.912	0.325851	0.0108359	0.0758514	0.000149393	0.00106069
P22792	Carboxypeptidase N subunit 2 OS=Homo sapiens OX=9606 GN=CPN2 PE=1 SV=3	250728	727139	809201	547230		727226	253517		437171	228302	2.64345e+06	4.82769e+06	4.69964e+06	939288	3.41041e+06	8.05482e+06	5.11703e+06	9.1513e+06	5.0826e+06	2.93994e+06	1	8	10	49.2201	529.089	0.093028	0.473684	0.872576	0.000181651	0.0011215
P31944	Caspase-14 OS=Homo sapiens OX=9606 GN=CASP14 PE=1 SV=2	1.28725e+06	9.77001e+06	617725	2.19385e+06	8.11469e+06		739043	2.1704e+06	848002										406788			8	1	172.883	469.964	0.367864	0.00547749	0.0479281	0.001444	0.00519109
P49913	Cathelicidin antimicrobial peptide OS=Homo sapiens OX=9606 GN=CAMP PE=1 SV=1	3.91475e+08	2.68902e+08	2.08639e+08	6.58621e+08	3.78548e+08	3.02344e+08	2.50145e+08	2.03986e+08	1.02592e+08	1.3591e+08	3.68222e+06	4.1983e+08	4.54865e+06	2.54401e+08	4.2253e+06	8.59277e+06	5.08995e+07	9.27086e+07	1.6774e+08	5.05792e+06		10	10	25952.3	859.277	30.2025			0.0089307	0.021136
P07339	Cathepsin D OS=Homo sapiens OX=9606 GN=CTSD PE=1 SV=1	2.91992e+06	9.01711e+06		1.42558e+06		1.27626e+06		1.45382e+06	556443	2.30243e+06												7	0	145.382	2974.61	0.0488743	0.00309598	0.0375089	0.00221254	0.00683002
P20645	Cation-dependent mannose-6-phosphate receptor OS=Homo sapiens OX=9606 GN=M6PR PE=1 SV=1	653583			928713	167994	1.01888e+06	707644	525282				192281	149960			157303			198664	142894		6	5	68.0614	15.7303	4.32677	1	1.14964	0.165465	0.231489
O95810	Caveolae-associated protein 2 OS=Homo sapiens OX=9606 GN=CAVIN2 PE=1 SV=3	3.13424e+06	4.22877e+06	603690	1.36963e+07	3.15791e+06	9.23447e+06	6.38124e+06	1.87241e+06	5.21789e+06	3.00736e+06	1.92131e+06	2.75896e+06	2.11706e+06	4.45349e+06	1.68362e+06	826435	3.1892e+06	2.19828e+06	1.41989e+07	5.72768e+06		10	10	369.334	192.131	1.92231			0.393048	0.477033
P13501	C-C motif chemokine 5 OS=Homo sapiens OX=9606 GN=CCL5 PE=1 SV=3								20618.7			38569.3		19922.1		68904.2							1	3	2.06187	211.706	0.001	0.436784	0.88146
P48509	CD151 antigen OS=Homo sapiens OX=9606 GN=CD151 PE=1 SV=3				1.35602e+06	1.92003e+06	681382		2.8974e+06	1.14557e+06		489448	1.02429e+06	1.27112e+06	996509	1.27559e+06	695632	2.10581e+06	956542	2.42121e+06	1.14561e+06		5	10	135.602	99.6509	1.36077	0.0325077	0.146285	0.182553	0.251675
Q15762	CD226 antigen OS=Homo sapiens OX=9606 GN=CD226 PE=1 SV=2				508393						51437.2												2	0	27.9915	108.495	0.257999	0.473684	0.867503
O43866	CD5 antigen-like OS=Homo sapiens OX=9606 GN=CD5L PE=1 SV=1	1.48548e+08	4.65904e+07	2.65188e+08	1.14826e+08	2.00331e+08	1.8774e+08	1.67488e+08	1.2933e+08	1.05999e+08	1.65128e+08	3.7068e+08	1.12813e+08	8.40348e+08	2.26031e+08	4.86678e+08	8.26346e+08	4.87255e+08	3.78869e+08	5.1314e+08	3.87893e+08		10	10	15683.8	43728.6	0.358663			0.00105003	0.00397613
P13987	CD59 glycoprotein OS=Homo sapiens OX=9606 GN=CD59 PE=1 SV=1	445155						563738				871514	1.05783e+07	781676	2.54617e+06	1.12569e+06	1.0659e+06	2.13791e+06	934700	1.58107e+06	1.91332e+06		2	10	50.4447	6169.59	0.001	0.000714456	0.0160753	0.000110671	0.000924426
P21926	CD9 antigen OS=Homo sapiens OX=9606 GN=CD9 PE=1 SV=4	2.41107e+06	451441	2.93973e+06	7.98231e+06	244324		5.3407e+06	5.51607e+06	1.53924e+07	1.54845e+06	6.44371e+06	9.54799e+06	8.74997e+06	2.06104e+07	6.73621e+06	1.51436e+06	1.75877e+07	5.26804e+06	2.88979e+07	1.42251e+07		9	10	293.973	390.71	0.752407	1	1.09375	0.0146896	0.0328493
P14209	CD99 antigen OS=Homo sapiens OX=9606 GN=CD99 PE=1 SV=1											2.7497e+06	632689	1.21658e+06	1.20307e+06	1.67906e+06	1.94447e+06			587140	892783		0	8	0.01	400.887	0.001	0.000714456	0.0150036	0.000751179	0.00313728
P60953	Cell division control protein 42 homolog OS=Homo sapiens OX=9606 GN=CDC42 PE=1 SV=2	1.17729e+06		2.90311e+06	3.8438e+06	328344		2.1074e+06	8.38296e+06	2.88239e+06	807790	4.59506e+06	1.1849e+06	2.05508e+06	1.40787e+06	6.73376e+06	4.44524e+06	1.28714e+06	509568	1.39252e+06	7.29405e+06		8	10	249.489	140.02	1.78182	0.473684	0.862489	0.305614	0.385753
Q69YH5	Cell division cycle-associated protein 2 OS=Homo sapiens OX=9606 GN=CDCA2 PE=1 SV=2	4.89143e+06		1.014e+06	1.24996e+06	2.57516e+06		4.69763e+06	2.30264e+06	849891	1.94203e+06	2.68105e+06	2.40477e+06	2.79182e+06	758195	4.34717e+06	4.18456e+06	1.50949e+06	3.60676e+06	1.15805e+06	2.16626e+06		8	10	212.234	228.551	0.928603	0.473684	0.857532	0.307308	0.386174
P00450	Ceruloplasmin OS=Homo sapiens OX=9606 GN=CP PE=1 SV=1	2.81198e+07	4.45802e+07	2.93129e+07	1.31413e+07	3.43648e+06	1.29362e+07	1.9342e+07	3.46136e+06	3.543e+07	3.02022e+07	3.54436e+07	1.86827e+07	2.49554e+07	4.60829e+07	3.36228e+07	3.67044e+07	2.55193e+07	8.32215e+07	2.17927e+07	3.0772e+07	1	10	10	2373.09	1151.49	2.06088			0.0892096	0.141539
O00299	Chloride intracellular channel protein 1 OS=Homo sapiens OX=9606 GN=CLIC1 PE=1 SV=4	346808		338405	670698			340525		795907				247315									5	1	34.6808	3077.2	0.0112702	0.140867	0.403392
P11597	Cholesteryl ester transfer protein OS=Homo sapiens OX=9606 GN=CETP PE=1 SV=2	1.74787e+06	1.94469e+06	5.77774e+06	1.442e+07	5.9571e+06	3.95496e+06	3.30134e+07	4.08307e+07	4.80627e+06	2.52019e+06	2.65456e+07	7.99741e+06	1.65759e+07	3.19917e+06	1.76357e+07	4.54247e+06	1.74287e+07	1.85577e+07	2.49551e+07	2.24343e+07		10	10	529.201	1742.87	0.303637			0.14314	0.202248
P06276	Cholinesterase OS=Homo sapiens OX=9606 GN=BCHE PE=1 SV=1	356433	1.12679e+06	3.71758e+06	2.28464e+06	1.80146e+06	1.83027e+06	1.66149e+06	294020	1.21097e+07	2.79837e+06	5.16994e+06	4.52854e+06	3.12279e+06	5.91498e+06	4.57861e+06	4.02868e+06	2.76559e+06	3.84993e+06	1.51586e+06	3.41757e+06	1	10	10	181.587	487.428	0.372541			0.0257481	0.0518614
Q96DZ9	CKLF-like MARVEL transmembrane domain-containing protein 5 OS=Homo sapiens OX=9606 GN=CMTM5 PE=1 SV=2		120912						1.15624e+06														2	0	63.8575	393.93	0.162103	0.473684	0.852632
Q9NX76	CKLF-like MARVEL transmembrane domain-containing protein 6 OS=Homo sapiens OX=9606 GN=CMTM6 PE=1 SV=1	38357	64810.8	424670				35071.5		286690													5	0	6.48108	0.01	1000	0.0325077	0.144224
P53675	Clathrin heavy chain 2 OS=Homo sapiens OX=9606 GN=CLTCL1 PE=1 SV=2											6.84851e+06		1.60932e+07		2.03814e+06	1360070				6.9663e+06		0	5	0.01	684.851	0.001	0.0325077	0.142221
P09496	Clathrin light chain A OS=Homo sapiens OX=9606 GN=CLTA PE=1 SV=1												851296					367046					0	2	0.01	203.814	0.001	0.473684	0.847787
O00501	Claudin-5 OS=Homo sapiens OX=9606 GN=CLDN5 PE=1 SV=1											36230.7		37846.5		54224.1	233958		76969.8	277772	87792.7		0	7	0.01	8.77927	0.001	0.00309598	0.0361197	0.00221254	0.0066847
P10909	Clusterin OS=Homo sapiens OX=9606 GN=CLU PE=1 SV=1	5.2769e+08	1.48541e+08	7.33967e+08	4.76661e+08	3.68333e+08	4.06014e+08	7.39645e+08	6.1503e+08	2.13108e+08	4.16323e+08	1.80377e+08	3.38284e+08	3.58772e+08	2.47735e+08	1.98934e+08	8.18206e+07	2.85322e+08	5.46563e+08	3.67418e+08	3.65942e+08	1	10	10	44649.2	18037.7	2.47532			0.0288056	0.0564192
P12259	Coagulation factor V OS=Homo sapiens OX=9606 GN=F5 PE=1 SV=4	1.46858e+07	9.98496e+06	8.15868e+06	4.61664e+07	2.62714e+07	6.57801e+07	3.57138e+07	3.86058e+07	2.11986e+07	1.31114e+07	3.42869e+07	3.82035e+07	2.68145e+07	2.9053e+07	4.05352e+07	4.23757e+07	3.68836e+07	3.85946e+07	5.27955e+07	5.06805e+07	1	10	10	2373.5	6730.8	0.352632			0.0892096	0.140753
P00451	Coagulation factor VIII OS=Homo sapiens OX=9606 GN=F8 PE=1 SV=1											262150	67558.5	363002	21502.6	321017	433066	169354	107570	119049	1.04374e+06	1	0	10	0.01	1392.91	0.001	1e-05	0.00315	6.38644e-05	0.000647768
P00742	Coagulation factor X OS=Homo sapiens OX=9606 GN=F10 PE=1 SV=2	206195		4.01459e+06	3.01377e+06	1.43854e+06	5.10189e+06				354703	1.34558e+06	2.44514e+06	6.26485e+06	973643	1.21505e+06	1.20174e+06	1.14642e+06	1.04665e+06	1.25953e+06	1.4871e+06	1	6	10	222.615	100.869	2.20697	0.0866873	0.287437	0.239547	0.319396
P03951	Coagulation factor XI OS=Homo sapiens OX=9606 GN=F11 PE=1 SV=1	390262	1.56901e+06		1.14981e+06		4.32509e+06	775564	2.04333e+06	2.55187e+06	5.91816e+06	1.32247e+06	1.17707e+06		1.52798e+06	745889	536380	1.76508e+06	2.01844e+06	4.22962e+06	1.25917e+06	1	8	10	180.617	125.953	1.434	0.473684	0.842997	0.849884	0.907394
P00488	Coagulation factor XIII A chain OS=Homo sapiens OX=9606 GN=F13A1 PE=1 SV=4	998785	1.19384e+06	3.74871e+06	3.49154e+06	3.86181e+06	1.78641e+07	8923.93	1.61803e+06		3.00257e+06	2.96923e+07	2.99962e+07	1.96839e+07	3.65259e+07	3.33731e+07	1.69076e+07	3.0067e+07	3.12464e+07	2.18597e+07	1.96728e+07	1	9	10	300.257	1690.76	0.177587	1	1.08997	2.16502e-05	0.000236487
P05160	Coagulation factor XIII B chain OS=Homo sapiens OX=9606 GN=F13B PE=1 SV=3	4.81396e+06	901236	6.81178e+06	429421	4.64638e+06		4.93604e+06	3.34335e+06	4.69557e+06	1.42197e+06	1.48735e+07	1.26422e+07	9.58688e+06	1.82317e+07	3.61401e+07	1.8289e+07	2.5764e+07	1.54889e+07	1.23458e+07	1.14116e+07	1	9	10	464.638	1967.84	0.236116	1	1.08621	1.08251e-05	0.000146396
P23528	Cofilin-1 OS=Homo sapiens OX=9606 GN=CFL1 PE=1 SV=3	1.32525e+06	662110	1.82872e+06	372741		363689			3.56981e+06	3.87781e+06	139291		102752	261716	349026		151449	166097	177197	344404		7	8	132.525	1049.93	0.126223	1	1.30165	0.086709	0.139917
O75534	Cold shock domain-containing protein E1 OS=Homo sapiens OX=9606 GN=CSDE1 PE=1 SV=2			1.16518e+06	6.07399e+06												9403.52						2	1	361.959	16.6097	21.7919	1	1.23529
P02452	Collagen alpha-1(I) chain OS=Homo sapiens OX=9606 GN=COL1A1 PE=1 SV=5	4.29939e+06	2.63066e+06	6.33007e+06	1.24711e+07	5.76293e+06	6.96483e+06	3.65845e+06	364956	8.42057e+06	4.50415e+06	8.80528e+07	2.242e+06	9.93503e+07	1.05475e+07	7.29216e+07	1.0261e+08	1.25671e+07	6.03243e+06	4.04875e+06	5.8626e+07		10	10	513.354	1256.71	0.40849			0.0288056	0.0560327
P02458	Collagen alpha-1(II) chain OS=Homo sapiens OX=9606 GN=COL2A1 PE=1 SV=3	1.67394e+06										270763	145970		91276	275143	144281	117733	44484.3	81035			1	8	167.394	314.537	0.53219	0.00547749	0.0466327	0.0116113	0.0265936
P12109	Collagen alpha-1(VI) chain OS=Homo sapiens OX=9606 GN=COL6A1 PE=1 SV=3				1.53069e+06	731903		1.79211e+06	9.08366e+06	1.23946e+06	2.22253e+06	793693	867014	129531		658648	410886	1.41525e+06	1.19737e+06	3.67734e+06	1.95838e+06		6	9	166.14	27.5143	6.0383	0.303406	0.692556	0.909038	0.938789
Q02388	Collagen alpha-1(VII) chain OS=Homo sapiens OX=9606 GN=COL7A1 PE=1 SV=2		1.05979e+06			340405	613223		4.64044e+06	549301				817609		250917		193183	299143				5	4	61.3223	79.3693	0.77262	1	1.14545
P08123	Collagen alpha-2(I) chain OS=Homo sapiens OX=9606 GN=COL1A2 PE=1 SV=7			235948	3.03431e+06	157751			584201		428523	2.67235e+06	1.10708e+06	2.13569e+06	7.25957e+06	2.52379e+06	1.35088e+06	8.94742e+06	3.85615e+06	1.25119e+06	3.38465e+06		5	10	42.8523	174.328	0.245814	0.0325077	0.140273	0.000922029	0.00368812
P12111	Collagen alpha-3(VI) chain OS=Homo sapiens OX=9606 GN=COL6A3 PE=1 SV=5					751961		1.70916e+06	4.29898e+06	358110	1.55813e+06	677023	1.55464e+06	409079	257676	1.14688e+06	1.22637e+06	2.13472e+06	1.7633e+06	5.17042e+06	2.67177e+06		7	10	155.813	194.901	0.799448	0.210526	0.539153	0.061021	0.102544
Q9BWP8	Collectin-11 OS=Homo sapiens OX=9606 GN=COLEC11 PE=1 SV=1	1.91812e+06	1.28264e+06	2.65108e+06				810306		962561		94385.3	89160.8	76917.6	36227.6	127277	1.89857e+06	74567.8	145785	222096	247252		5	10	128.264	33.3378	3.8474	0.0325077	0.138378	0.848981	0.909851
P02745	Complement C1q subcomponent subunit A OS=Homo sapiens OX=9606 GN=C1QA PE=1 SV=2	9.26673e+08	1.052e+09	1.19933e+09	2.00397e+08	2.1118e+08	4.12419e+07	5.67271e+08	2.04721e+09	1.56839e+09	8.80442e+08	2.0264e+08	1.64737e+08	6.14231e+07	8.77836e+07	1.59474e+08	1.06088e+08	1.27583e+08	1.54229e+08	1.3515e+08	1.27261e+08	1	10	10	90355.7	3166.08	28.5387			0.00208924	0.00674255
P02746	Complement C1q subcomponent subunit B OS=Homo sapiens OX=9606 GN=C1QB PE=1 SV=3	3.31518e+09	3.86463e+09	4.47128e+09	2.06175e+09	1.17351e+09	2.83307e+09	2.50356e+09	3.98119e+09	4.65106e+09	3.01515e+09	8.11572e+08	6.24713e+08	3.02509e+08	3.27489e+08	9.40845e+08	2.81787e+08	5.30729e+08	5.60315e+08	4.35591e+08	5.3694e+08	1	10	10	316516	24221.4	13.0676			1.08251e-05	0.000146396
P02747	Complement C1q subcomponent subunit C OS=Homo sapiens OX=9606 GN=C1QC PE=1 SV=3	2.41959e+09	2.31527e+09	3.57593e+09	8.49956e+08	8.73055e+08	3.73569e+08	1.5608e+09	2.30941e+09	3.59468e+09	2.34668e+09	5.53844e+08	5.42575e+08	2.62415e+08	2.6228e+08	6.88151e+08	2.42666e+08	5.18331e+08	6.07159e+08	4.26117e+08	4.08574e+08	1	10	10	231234	52453	4.4084			0.000487129	0.00223136
P00736	Complement C1r subcomponent OS=Homo sapiens OX=9606 GN=C1R PE=1 SV=2	4.93443e+08	4.85812e+07	2.58261e+08	2.63245e+08	3.27718e+08	8.01255e+08	4.69447e+08	7.52337e+08	5.1252e+08	6.13162e+08	2.4344e+08	2.96204e+08	1.41428e+08	1.32674e+08	2.90954e+08	2.57106e+08	3.04259e+08	2.89683e+08	2.92146e+08	2.4844e+08	1	10	10	48144.5	29155	1.65133			0.0232306	0.047464
Q9NZP8	Complement C1r subcomponent-like protein OS=Homo sapiens OX=9606 GN=C1RL PE=1 SV=2				1.93309e+06				2.61798e+06				841276		1.06998e+06				1.20011e+06	1.49403e+06		1	2	7	227.554	24594	0.001	0.0697785	0.244225	0.608242	0.699355
P09871	Complement C1s subcomponent OS=Homo sapiens OX=9606 GN=C1S PE=1 SV=1	5.53746e+08	5.37816e+07	3.5419e+08	3.39187e+08	6.29423e+08	1.12529e+09	8.77364e+08	9.34189e+08	4.75394e+08	6.09755e+08	3.4505e+08	3.30326e+08	2.59833e+08	2.07073e+08	4.70895e+08	3.13428e+08	3.90369e+08	4.35428e+08	3.10609e+08	3.92184e+08	1	10	10	58175	31201.9	1.86447			0.0185434	0.0395964
P01024	Complement C3 OS=Homo sapiens OX=9606 GN=C3 PE=1 SV=2	1.56856e+08	6.10148e+07	1.46244e+08	3.94078e+08	2.5844e+08	8.02201e+07	1.66548e+08	7.77969e+08	1.41004e+08	1.28243e+08	5.54545e+08	7.81444e+08	6.34499e+08	3.67793e+08	7.18894e+08	6.20354e+08	5.45762e+08	7.51244e+08	4.88085e+08	5.52548e+08	1	10	10	15155	45316.1	0.334428			0.00150469	0.00508728
P0C0L4	Complement C4-A OS=Homo sapiens OX=9606 GN=C4A PE=1 SV=2											541283	454025	1.18716e+06	151168	646900	519798	707928	3.70693e+06	661324	983105	1	0	10	0.01	18575	0.001	1e-05	0.001575	6.38644e-05	0.000625431
P0C0L5	Complement C4-B OS=Homo sapiens OX=9606 GN=C4B PE=1 SV=2	1.12365e+08	6.90113e+07	1.62477e+08	3.59796e+08	1.84964e+08	3.81105e+08	3.13583e+08	4.27702e+08	7.029e+07	1.33774e+08	1.23244e+08	1.40729e+08	1.58766e+08	3.2806e+07	1.73933e+08	1.51387e+08	1.37851e+08	3.39141e+08	9.53205e+07	1.90658e+08	1	6	10	17372	1825.65	9.51555	0.0866873	0.284443	0.427355	0.512105
P01031	Complement C5 OS=Homo sapiens OX=9606 GN=C5 PE=1 SV=4	338235		330918	7.94524e+06	3.1375e+06		483871	1.25015e+07	629374	962076	9.81324e+06	9.41781e+06	1.51681e+07	3.01838e+06	1.8629e+07	1.66718e+07	7.18134e+06	1.44901e+07	7.72664e+06	2.83689e+07	1	8	10	79.5725	3058.75	0.0260147	0.473684	0.838261	0.00103921	0.0040991
P07360	Complement component C8 gamma chain OS=Homo sapiens OX=9606 GN=C8G PE=1 SV=3											695184	205837	776425	373807	968445	653150	109476	349641		952637	1	0	9	0.01	301.838	0.001	0.000119076	0.00750179	0.000231246	0.00131348
P02748	Complement component C9 OS=Homo sapiens OX=9606 GN=C9 PE=1 SV=2	6.39823e+06	1.08966e+07	4.55149e+07	1.63279e+08	3.30086e+07	8.37609e+06	9.99084e+07	9.09148e+07	1.62515e+07	5.51837e+07	2.18676e+07	5.20643e+07	9.01438e+07	2.57155e+07	6.60017e+07	2.28242e+07	5.37411e+07	4.84281e+07	3.86215e+07	8.31931e+07	1	10	10	3926.17	2186.76	1.79543			0.684211	0.768047
P00751	Complement factor B OS=Homo sapiens OX=9606 GN=CFB PE=1 SV=2	530750			621575	56227.6			996955		854111	1.77017e+06	893186	3.13423e+06	524486	3.57247e+06	3.97918e+06	637378	1.03085e+06	559476	2.68879e+06	1	5	10	62.1575	1292.34	0.048097	0.0325077	0.136533	0.00262432	0.00745306
P08603	Complement factor H OS=Homo sapiens OX=9606 GN=CFH PE=1 SV=4	7.59054e+06	4.60058e+07	5.9928e+06	2.80797e+07	1.2281e+07	1.9091e+07	1.1798e+07	3.3623e+07	2.82033e+07	1.95069e+07	3.60273e+08	3.7459e+08	2.73748e+08	5.13971e+08	3.56242e+08	3.85944e+08	3.49634e+08	3.32078e+08	2.28313e+08	1.99823e+08	1	10	10	1929.89	10190.1	0.189389			1.08251e-05	0.000146396
Q02985	Complement factor H-related protein 3 OS=Homo sapiens OX=9606 GN=CFHR3 PE=1 SV=2				5.77479e+06		1.19774e+06						9.56496e+06	6.72415e+06	2.71583e+07	5.08669e+06	801879	3.78996e+06	1.29304e+06	413098	837326	1	2	9	348.627	19982.3	0.0174468	0.00547749	0.0454055	0.00625285	0.0151779
Q15517	Corneodesmosin OS=Homo sapiens OX=9606 GN=CDSN PE=1 SV=3	591019	9.36451e+06	373591	312883	1.25505e+06	3.46779e+06	256440															7	0	59.1019	378.996	0.155944	0.00309598	0.0348297	0.00221254	0.00675658
P08185	Corticosteroid-binding globulin OS=Homo sapiens OX=9606 GN=SERPINA6 PE=1 SV=1											613162	613240			585478	281831	290053	1.69904e+06	768952		1	0	7	0.01	61.3162	0.001	0.00309598	0.0336287	0.00221254	0.00661434
Q15828	Cystatin-M OS=Homo sapiens OX=9606 GN=CST6 PE=1 SV=1		8.51398e+06									1.26283e+06		963487		223752					1.38017e+06		1	4	851.398	61.324	13.8836	0.303406	0.687574
P04839	Cytochrome b-245 heavy chain OS=Homo sapiens OX=9606 GN=CYBB PE=1 SV=2							67993.5	648095		226258		448176		28659		118123	66958.4		390862	174014		3	6	22.6258	30.7307	0.73626	0.36985	0.742056	0.341312	0.423287
Q96EP5	DAZ-associated protein 1 OS=Homo sapiens OX=9606 GN=DAZAP1 PE=1 SV=1			1.27026e+06	4.86553e+06																		2	0	306.79	14.6068	21.0032	0.473684	0.833578
P81605	Dermcidin OS=Homo sapiens OX=9606 GN=DCD PE=1 SV=2	1.64532e+06	5.33319e+06	3.52483e+06	3.39765e+06	4.46282e+06	5.50702e+06	1.95324e+06	1.00608e+06	1.46542e+06	6.6468e+06	345128	177388	261979	1.31749e+06		134762			342632	213241		10	7	346.124	26.1979	13.2119	0.210526	0.534805	2.16502e-05	0.000236487
Q08554	Desmocollin-1 OS=Homo sapiens OX=9606 GN=DSC1 PE=1 SV=2	1.14315e+06	2.91822e+07	902789	939813	4.93823e+06		2.28619e+06	1.16279e+06	815765		1.02007e+06				1.42888e+06	1.06314e+06		887253		1.4609e+06		8	5	115.297	61.6191	1.87112	0.349845	0.754803	0.176491	0.244505
Q02413	Desmoglein-1 OS=Homo sapiens OX=9606 GN=DSG1 PE=1 SV=2	1.72133e+06	1.5393e+07	1.56385e+06	871468	1.64867e+06		695986	1.86436e+06	4.9448e+06		366870			292630		291408	293945					8	4	168.5	88.7253	1.89912	0.169802	0.461101	0.00556225	0.0139795
P15924	Desmoplakin OS=Homo sapiens OX=9606 GN=DSP PE=1 SV=3	1.42549e+06	8.79239e+06			6.13496e+06		1.47151e+06	1.60121e+06		2.00567e+06								534351				8	5	180.344	29.3945	6.13531	0.349845	0.749668	0.014719	0.0324047
P42658	Dipeptidyl aminopeptidase-like protein 6 OS=Homo sapiens OX=9606 GN=DPP6 PE=1 SV=2													3.3811e+06		498260					271114		0	8	0.01	51.6305	0.001	0.000714456	0.0140658	0.0778725	0.127837
O14672	Disintegrin and metalloproteinase domain-containing protein 10 OS=Homo sapiens OX=9606 GN=ADAM10 PE=1 SV=1											214832		393562	417242	224030		709424		464415	372618		0	7	0.01	40.5402	0.001	0.00309598	0.0325077	0.00221254	0.00654544
P09172	Dopamine beta-hydroxylase OS=Homo sapiens OX=9606 GN=DBH PE=1 SV=3																191514						0	1	0.01	38.309	0.001	1	1.08247
M0R2J8	Doublecortin domain-containing protein 1 OS=Homo sapiens OX=9606 GN=DCDC1 PE=1 SV=1	5.59372e+06		3.19697e+06	618283	4.86959e+06		9.53509e+06	3.05481e+07	2.36349e+06	8.05911e+06	1.11928e+07	127998	2.61049e+07		3.51813e+07	3.06502e+07				9.14482e+06		8	6	523.166	1119.28	0.467414	0.628483	0.920801	0.892496	0.931871
Q12805	EGF-containing fibulin-like extracellular matrix protein 1 OS=Homo sapiens OX=9606 GN=EFEMP1 PE=1 SV=2			405034	866181							270940	175296	548094	44802.6	352311	330979	302579	246780	308102			2	9	63.5608	33.0979	1.92039	0.00547749	0.0442413	0.0357115	0.0650133
P68104	Elongation factor 1-alpha 1 OS=Homo sapiens OX=9606 GN=EEF1A1 PE=1 SV=1			1.45909e+07	1.17645e+08	43052.1							2.34845e+06		60464.9				373052		60167.6		3	4	1459.09	30.2579	48.222	1	1.17978
P13639	Elongation factor 2 OS=Homo sapiens OX=9606 GN=EEF2 PE=1 SV=4			1.77965e+06	6.73758e+06																		2	0	425.861	21.6758	19.6468	0.473684	0.828947
O94919	Endonuclease domain-containing 1 protein OS=Homo sapiens OX=9606 GN=ENDOD1 PE=1 SV=2												150471		240355			334208		233028			0	4	0.01	23.6691	0.001	0.0866873	0.28151
P63241	Eukaryotic translation initiation factor 5A-1 OS=Homo sapiens OX=9606 GN=EIF5A PE=1 SV=2			1.40622e+06	7.86905e+06								378511										2	1	463.764	24.0355	19.295	1	1.23047
Q16658	Fascin OS=Homo sapiens OX=9606 GN=FSCN1 PE=1 SV=3			3.70625e+06	1.72172e+07	134843					30738.1		499176				4923.46		62414.3				4	3	192.054	22.0463	8.71142	1	1.17537
Q86UX7	Fermitin family homolog 3 OS=Homo sapiens OX=9606 GN=FERMT3 PE=1 SV=1	1.18424e+06	6.84471e+06	2.2081e+06	9.15034e+06	5.5263e+06	1.58287e+07	1.78817e+06	1.8311e+06	8.17179e+06	2.90304e+06	1.98933e+06	4.57955e+06	6.06967e+06	1.16475e+07	3.59467e+06	1.45775e+06	8.94722e+06	1.74864e+06	1.87522e+07	4.08764e+06		10	10	421.467	359.467	1.17248			0.853428	0.894368
P35555	Fibrillin-1 OS=Homo sapiens OX=9606 GN=FBN1 PE=1 SV=4												562101		621398			775959	720990	460058			0	5	0.01	198.933	0.001	0.0325077	0.134736
P02671	Fibrinogen alpha chain OS=Homo sapiens OX=9606 GN=FGA PE=1 SV=2	1.11215e+10	1.99484e+09	5.04051e+09	3.72777e+09	1.06049e+10	2.2067e+09	9.67896e+09	6.69419e+09	4.19705e+09	6.15612e+09	1.11994e+10	9.23901e+09	1.19297e+10	7.52016e+09	1.12834e+10	1.16814e+10	1.11939e+10	1.05547e+10	8.03148e+09	1.05811e+10	1	10	10	559832	923901	0.605943			0.00388621	0.0104121
P02675	Fibrinogen beta chain OS=Homo sapiens OX=9606 GN=FGB PE=1 SV=2	4.80845e+09	7.25484e+08	2.1902e+09	1.29057e+09	5.68119e+09	7.89507e+08	4.39213e+09	2.72928e+09	2.01514e+09	2.4832e+09	6.30028e+09	4.3461e+09	7.11438e+09	3.48221e+09	6.35195e+09	7.53483e+09	6.05639e+09	5.51061e+09	4.18042e+09	5.61098e+09	1	10	10	233670	752749	0.310422			0.00208924	0.00666679
P02679	Fibrinogen gamma chain OS=Homo sapiens OX=9606 GN=FGG PE=1 SV=3	5.1964e+09	6.94506e+08	2.25779e+09	1.22417e+09	3.93039e+09	6.84349e+08	4.25847e+09	2.81685e+09	2.10808e+09	2.43677e+09	8.52526e+09	6.03854e+09	8.50007e+09	5.5396e+09	8.47302e+09	8.8904e+09	7.78977e+09	7.73593e+09	5.92872e+09	7.33682e+09		10	10	234728	632612	0.371046			1.08251e-05	0.000146396
Q08830	Fibrinogen-like protein 1 OS=Homo sapiens OX=9606 GN=FGL1 PE=1 SV=3	214415				706816		106447		237068	108452	73385			223714			81838.7	227603	110361			5	5	21.4415	603854	0.001	1	1.37555
P02751	Fibronectin OS=Homo sapiens OX=9606 GN=FN1 PE=1 SV=5	2.88305e+08	2.41211e+08	1.53986e+08	1.16312e+09	2.80063e+08	6.39552e+08	4.36147e+08	3.48738e+08	4.35995e+08	4.87265e+08	7.34464e+08	5.296e+08	4.24448e+08	2.45929e+08	7.38788e+08	6.35146e+08	1.21727e+09	1.10007e+09	1.12797e+09	1.50388e+09	1	10	10	39236.7	52960	0.740874			0.0288056	0.0556516
P23142	Fibulin-1 OS=Homo sapiens OX=9606 GN=FBLN1 PE=1 SV=4	3.69665e+06	467077	56407.8	1.42135e+07	6.92784e+06		1.2092e+07	4.67247e+07	1.02302e+06	3.51531e+06	1.44374e+06	2.6184e+06	1.56344e+06	1.29182e+06	5.11788e+06	957657	7.32402e+06	1.41614e+07	4.15513e+06	1.67605e+06	1	9	10	369.665	13004.5	0.0284258	1	1.07877	1	1
O00602	Ficolin-1 OS=Homo sapiens OX=9606 GN=FCN1 PE=1 SV=2	1.05441e+06				1.04809e+06		901967	257446			383773	1.91222e+06	495707	2.0428e+06	242766	214981	2.04053e+06	1.57968e+06	2.06813e+06	378047		4	10	97.5026	162.786	0.598962	0.0108359	0.0742024	0.0127834	0.0290439
Q15485	Ficolin-2 OS=Homo sapiens OX=9606 GN=FCN2 PE=1 SV=2		29965			36010			606933			2.89961e+06	2.88201e+06	4.25301e+06	3.23584e+06	6.86492e+06	3.96727e+06	1.00084e+07	5.08832e+06	2.05053e+06	4.13115e+06		3	10	3.601	205.933	0.0174863	0.00309598	0.0314591	0.00013173	0.000984505
O75636	Ficolin-3 OS=Homo sapiens OX=9606 GN=FCN3 PE=1 SV=2	1.61531e+07	1.40559e+06	4.35634e+06	1.34963e+06	7.88653e+06	1.01015e+06	7.17235e+06	5.06148e+06	4.50226e+06	4.05504e+06	5.96088e+07	1.33041e+08	3.67926e+07	1.41764e+08	1.06684e+08	6.50319e+07	1.00492e+08	6.81898e+07	1.06947e+08	8.45536e+07	1	10	10	442.93	2340.05	0.189282			1.08251e-05	0.000146396
Q5D862	Filaggrin-2 OS=Homo sapiens OX=9606 GN=FLG2 PE=1 SV=1		1.74394e+06			4.54697e+06		1.76393e+06									1.72112e+06		87541.7				3	2	176.393	7637.17	0.0230967	1	1.2963
P21333	Filamin-A OS=Homo sapiens OX=9606 GN=FLNA PE=1 SV=4	1.12795e+07	1.00889e+07	1.58212e+07	6.47717e+07	3.96143e+07	9.66e+07	1.96653e+07	3.78698e+07	7.47333e+07	2.71179e+07	4.96222e+07	1.7071e+07	4.1624e+07	1.73743e+07	7.27716e+07	3.14106e+07	3.22497e+07	1.97423e+07	7.75151e+07	7.82326e+07		10	10	3249.38	3183.01	1.02085			0.481251	0.567117
O75955	Flotillin-1 OS=Homo sapiens OX=9606 GN=FLOT1 PE=1 SV=3												250123					9921.13		53784.2			0	3	0.01	3141.06	0.001	0.210526	0.530526
P04075	Fructose-bisphosphate aldolase A OS=Homo sapiens OX=9606 GN=ALDOA PE=1 SV=2	1.27993e+06	8502.61	2.49709e+07	1.53341e+08	3.98551e+06	2.45666e+07	4.20257e+06	1.90972e+06		2.04111e+06	886876	2.96749e+06	463653	1.55223e+06	255625	192417	1.20989e+06	135671	1.72971e+06	1.25637e+06		9	10	398.551	104.838	3.80158	1	1.07509	0.0640221	0.106955
Q08380	Galectin-3-binding protein OS=Homo sapiens OX=9606 GN=LGALS3BP PE=1 SV=1	4.69917e+08	1.97165e+07	2.85291e+07	2.07717e+08	1.39784e+08	3.06021e+07	1.41208e+08	2.28294e+08	1.14951e+08	4.14255e+08	5.6778e+08	3.59918e+08	1.79465e+08	3.88452e+08	4.54295e+08	4.44937e+08	5.8465e+08	1.65219e+09	5.34071e+08	1.19061e+09		10	10	14049.6	9121.61	1.54025			0.00150469	0.00502743
Q96QA5	Gasdermin-A OS=Homo sapiens OX=9606 GN=GSDMA PE=1 SV=4	341621	9.38305e+06	992456	1.36886e+06	3.20683e+06										159705	99365.6						5	2	136.886	44961.6	0.001	0.349845	0.744603
P06396	Gelsolin OS=Homo sapiens OX=9606 GN=GSN PE=1 SV=1	3.32571e+07	3.05918e+07	2.65055e+07	2.59681e+08	6.00928e+07	1.48512e+07	1.0262e+08	3.71471e+08	5.40646e+07	4.82163e+07	2.09105e+08	1.16584e+08	1.38151e+08	6.04254e+07	1.42184e+08	6.10281e+07	7.55401e+07	1.32549e+08	1.15555e+08	1.43242e+08	1	10	10	5114.04	11607	0.440601			0.0432571	0.0767813
P11413	Glucose-6-phosphate 1-dehydrogenase OS=Homo sapiens OX=9606 GN=G6PD PE=1 SV=4			1.30029e+06	6.14145e+06																		2	0	372.087	12456.7	0.0298705	0.473684	0.824368
P00390	Glutathione reductase, mitochondrial OS=Homo sapiens OX=9606 GN=GSR PE=1 SV=2			1.08527e+06	5.7277e+06										141266								2	1	340.648	14.1266	24.1139	1	1.22568
P09211	Glutathione S-transferase P OS=Homo sapiens OX=9606 GN=GSTP1 PE=1 SV=2			2.60454e+06	9.53756e+06																		2	0	607.105	14.1266	42.9759	0.473684	0.819838
P04406	Glyceraldehyde-3-phosphate dehydrogenase OS=Homo sapiens OX=9606 GN=GAPDH PE=1 SV=3	2.17061e+06	1.3709e+07	7.12663e+07	3.46231e+08	7.07138e+06	8.59365e+06	1.49763e+06	1.23632e+07	27205	1.3822e+06	738988	8.92507e+06	1.86174e+06	3.63347e+06	834941	113387	2.89393e+06	1.57661e+06	3.81765e+06	1.86818e+06		10	10	783.251	186.496	4.19983			0.140465	0.200463
P02724	Glycophorin-A OS=Homo sapiens OX=9606 GN=GYPA PE=1 SV=2		267109										3.03378e+06		160197								1	2	26.7109	186.496	0.143225	1	1.22093
P04899	Guanine nucleotide-binding protein G(i) subunit alpha-2 OS=Homo sapiens OX=9606 GN=GNAI2 PE=1 SV=3				308759			301313		881138		632918	2.57343e+06	1.03687e+06	1.53053e+06	750849	403428	2.3622e+06	561161	2.87853e+06	1.50616e+06		3	10	30.8759	127.151	0.242828	0.00309598	0.030476	0.000440986	0.00212271
P63218	Guanine nucleotide-binding protein G(I)/G(S)/G(O) subunit gamma-5 OS=Homo sapiens OX=9606 GN=GNG5 PE=1 SV=3			5.29625e+07	1.45005e+08		7.00651e+07						654954		802926			776557	254235	905890			3	5	7006.51	80.2926	87.2622	0.649917	0.930562
P50148	Guanine nucleotide-binding protein G(q) subunit alpha OS=Homo sapiens OX=9606 GN=GNAQ PE=1 SV=4			768576						1.0918e+06		138849	588888	170381	297184	181114		376732	176561	4.08056e+06	559496		2	9	93.019	46.8114	1.9871	0.00547749	0.0431353	0.0292983	0.0558437
Q9HAV0	Guanine nucleotide-binding protein subunit beta-4 OS=Homo sapiens OX=9606 GN=GNB4 PE=1 SV=3	412002			4.81836e+06			1.15034e+06	5.32471e+06	3.66876e+06	2.36498e+06		2.32198e+06		5.23524e+06			2.73555e+06	1.32486e+06	5.49886e+06			6	5	301.687	57.4192	5.25411	1	1.1413	0.905371	0.941851
P00738	Haptoglobin OS=Homo sapiens OX=9606 GN=HP PE=1 SV=1	4.21934e+08	2.85086e+08	6.78666e+08	9.49841e+08	4.99119e+08	1.66397e+09	4.25757e+08	3.48776e+08	3.73872e+08	4.0685e+08	3.65091e+09	5.41401e+09	4.33035e+09	1.53072e+10	8.22618e+08	3.25772e+09	6.08327e+09	2.68282e+09	7.08154e+09	5.78027e+09	1	10	10	42384.6	325772	0.130105			4.33004e-05	0.000455456
P00739	Haptoglobin-related protein OS=Homo sapiens OX=9606 GN=HPR PE=2 SV=2	4.57371e+08	5.02752e+07	6.75045e+08	2.25093e+08	9.54022e+08	7.93571e+08	4.53834e+08	3.60198e+08	3.22219e+08	3.15427e+08	3.85219e+08	1.55435e+08	4.6093e+08	1.12705e+08	7.13677e+08	5.57278e+08	2.15261e+08	2.32335e+08	4.10148e+08	5.34858e+08	1	10	10	40701.6	76814.7	0.529867			0.684211	0.771094
P0DMV9	Heat shock 70 kDa protein 1B OS=Homo sapiens OX=9606 GN=HSPA1B PE=1 SV=1			6.4238e+06	3.64527e+07	43865.2							805027		19909.1				45025.5				3	3	642.38	23233.5	0.0276488	1	1.36957
P11142	Heat shock cognate 71 kDa protein OS=Homo sapiens OX=9606 GN=HSPA8 PE=1 SV=1		7.97782e+06	5.59243e+06	1.92182e+07		4.54821e+06	2.04663e+06			1.16869e+07	586981	1.59152e+06	1.2801e+06	2.46423e+06	961702	357392	1.55905e+06	1.02398e+06	1.54638e+06	570156		6	10	678.513	96.1702	7.05533	0.0866873	0.278638	0.518947	0.606506
P07900	Heat shock protein HSP 90-alpha OS=Homo sapiens OX=9606 GN=HSP90AA1 PE=1 SV=5	108282		4.80446e+06	1.26735e+08	360806	337601	73974.4		159011		144038	1.16424e+06	187722	346345		59525.3	97219.9	246148	263371			7	8	33.7601	57.8568	0.583512	1	1.29098	0.909038	0.942215
P69905	Hemoglobin subunit alpha OS=Homo sapiens OX=9606 GN=HBA1 PE=1 SV=2	1.12835e+08	2.22918e+08	6.12717e+07	3.29313e+08	6.0993e+07	1.00168e+07	8.65238e+07	1.83317e+08	4.15457e+07	6.35166e+07	1.08113e+08	3.31521e+09	2.30008e+08	3.65723e+09	6.77394e+07	4.42324e+07	9.17206e+08	6.46547e+08	1.64015e+08	3.25592e+08	1	10	10	7502.02	5598.59	1.33998			0.035463	0.0653993
P68871	Hemoglobin subunit beta OS=Homo sapiens OX=9606 GN=HBB PE=1 SV=2	2.97671e+07	1.04476e+08	2.60272e+07	1.7116e+08	9.0563e+06	6.96249e+06	5.72862e+07	1.05329e+08	1.94664e+07	1.51635e+07	6.7133e+07	2.5116e+09	2.12457e+08	1.86108e+09	5.26403e+07	3.90929e+07	8.81913e+08	6.31601e+08	1.22143e+08	2.87434e+08	1	10	10	2789.71	25872.1	0.107827			0.00287947	0.00793952
P02042	Hemoglobin subunit delta OS=Homo sapiens OX=9606 GN=HBD PE=1 SV=2	1.06886e+06	1.4754e+06		1.75458e+06	697998		683338		577127		768642	1.72502e+07	55765.9	1.02755e+07	416549		3.81908e+06	2.3176e+06	236798	1.12418e+06	1	6	9	88.3428	3909.29	0.0225982	0.303406	0.682663	0.158805	0.22327
P69891	Hemoglobin subunit gamma-1 OS=Homo sapiens OX=9606 GN=HBG1 PE=1 SV=2				805592								1.93759e+06		4.19654e+06				1.48445e+06				1	3	80.5592	171.102	0.470825	0.582043	0.877242
P02790	Hemopexin OS=Homo sapiens OX=9606 GN=HPX PE=1 SV=2	454743		377276	1.49416e+06	41201.6	594302	194418	846667	572098	413957	3.55073e+06	5.8721e+06	4.48137e+06	8.02935e+06	4.52435e+06	7.74815e+06	4.29292e+06	1.17018e+07	4.04359e+06	2.82404e+06	1	9	10	45.4743	429.292	0.105929	1	1.07143	1.08251e-05	0.000146396
P05546	Heparin cofactor 2 OS=Homo sapiens OX=9606 GN=SERPIND1 PE=1 SV=3	1.05942e+07	1.41169e+07	3.46304e+07	7.2306e+07	1.99293e+07	1.3254e+07	7.23165e+07	1.11589e+08	3.5598e+07	2.80177e+07	2.05916e+07	9.92354e+07	6.92532e+07	2.05106e+07	2.65422e+07	4.70113e+06	5.61209e+07	5.49167e+07	5.25235e+07	4.56079e+07	1	10	10	3132.4	986.559	3.17508			0.684211	0.765023
Q04756	Hepatocyte growth factor activator OS=Homo sapiens OX=9606 GN=HGFAC PE=1 SV=1											679451		597646		810102	665401				511717		0	5	0.01	2059.16	0.001	0.0325077	0.132986
Q32P51	Heterogeneous nuclear ribonucleoprotein A1-like 2 OS=Homo sapiens OX=9606 GN=HNRNPA1L2 PE=2 SV=2			1.01576e+07	4.0508e+07	182524	617489		1.15835e+07				592922		146884								5	2	1015.76	59.7646	16.9961	0.349845	0.739606
P51991	Heterogeneous nuclear ribonucleoprotein A3 OS=Homo sapiens OX=9606 GN=HNRNPA3 PE=1 SV=2			1.6284e+06	7.48205e+06																		2	0	455.523	36.9903	12.3147	0.473684	0.815358
P52597	Heterogeneous nuclear ribonucleoprotein F OS=Homo sapiens OX=9606 GN=HNRNPF PE=1 SV=3			3.44181e+06	6.32917e+07	745410	2.93356e+06																4	0	318.769	0.01	1000	0.0866873	0.275823
P31943	Heterogeneous nuclear ribonucleoprotein H OS=Homo sapiens OX=9606 GN=HNRNPH1 PE=1 SV=4			2.43748e+06	2.74178e+07	400506	1.03666e+06																4	0	173.707	0.01	1000	0.0866873	0.273065
P31942	Heterogeneous nuclear ribonucleoprotein H3 OS=Homo sapiens OX=9606 GN=HNRNPH3 PE=1 SV=2		380970	1.7551e+06	2.51682e+07								537744		245918								3	2	175.51	39.1831	4.47923	1	1.28571
O60506	Heterogeneous nuclear ribonucleoprotein Q OS=Homo sapiens OX=9606 GN=SYNCRIP PE=1 SV=2		67694.9	1.49969e+06	9.74969e+06					164343			145663						120138	74674.2			4	3	83.2018	14.5663	5.71194	1	1.171
Q00839	Heterogeneous nuclear ribonucleoprotein U OS=Homo sapiens OX=9606 GN=HNRNPU PE=1 SV=6			3.36665e+06	2.84951e+07								764984						59255.2				2	2	1593.09	12.0138	1000	1	1.36364
P22626	Heterogeneous nuclear ribonucleoproteins A2/B1 OS=Homo sapiens OX=9606 GN=HNRNPA2B1 PE=1 SV=2			7.65806e+06	3.86118e+07	45389.4	1.03966e+06						640107										4	1	434.886	64.0107	6.79396	0.303406	0.677821
P07910	Heterogeneous nuclear ribonucleoproteins C1/C2 OS=Homo sapiens OX=9606 GN=HNRNPC PE=1 SV=4			1.59138e+06	7.51188e+06								111693										2	1	455.163	37.59	12.1086	1	1.21622
P49773	Histidine triad nucleotide-binding protein 1 OS=Homo sapiens OX=9606 GN=HINT1 PE=1 SV=2			4.62097e+06	2.42776e+07					45532.9			273567						82398.9				3	2	462.097	11.1693	41.3719	1	1.28049
P04196	Histidine-rich glycoprotein OS=Homo sapiens OX=9606 GN=HRG PE=1 SV=1	3.83541e+07	6.2665e+06	1.389e+07	7.28199e+07	1.99725e+07	2.08909e+07	3.05109e+07	2.68823e+07	1.50834e+07	2.63264e+07	5.11865e+07	9.06171e+07	4.82863e+07	7.36915e+07	7.11915e+07	8.35484e+07	9.40347e+07	1.27181e+08	8.72562e+07	4.79658e+07	1	10	10	2360.87	7244.15	0.325899			0.000129901	0.00102478
Q16777	Histone H2A type 2-C OS=Homo sapiens OX=9606 GN=H2AC20 PE=1 SV=4	26120.9	1.32447e+07	1.13738e+06	8.00027e+06	838749	1.57251e+06	490025	2.20845e+08	270151	332415	233314	1.35173e+07	372070	2.33011e+06	335438	97898.4	2.16834e+06	6.95572e+06	957850	541145		10	10	98.8064	3074.16	0.0321409			0.850107	0.904233
Q16778	Histone H2B type 2-E OS=Homo sapiens OX=9606 GN=H2BC21 PE=1 SV=3		2.60225e+07	1.48455e+06	1.24589e+07	1.41509e+06	3.4776e+06	1.2557e+06	3.15567e+08	1.25705e+06	425192	342222	1.31202e+07	783125	4.18364e+06			2.01589e+06	5.39652e+06	1.0295e+06	1.28359e+06		9	8	148.455	115.654	1.28361	1	1.21154	0.383957	0.470016
P84243	Histone H3.3 OS=Homo sapiens OX=9606 GN=H3-3A PE=1 SV=2		1.01405e+07		2.35618e+06	2.57808e+06	2.79029e+06	799708	7.71109e+07	518978	677885		4.18769e+06		637646			969342	1.80748e+06	451679			8	5	246.713	128.359	1.92206	0.349845	0.734675	0.0967973	0.149404
P62805	Histone H4 OS=Homo sapiens OX=9606 GN=H4C1 PE=1 SV=2		3.70471e+07	586442	1.90264e+07	4.51399e+06		1.76209e+06	1.70664e+08		3.88646e+06	289762	1.78587e+07	1.0765e+06	4.06471e+06	219167		4.66558e+06	6.51854e+06	1.45909e+06	218824		7	9	451.399	126.78	3.5605	0.582043	0.873065	0.750254	0.816369
P04439	HLA class I histocompatibility antigen, A alpha chain OS=Homo sapiens OX=9606 GN=HLA-A PE=1 SV=2				1.59281e+06	1.47524e+06	3.22514e+06	1.43355e+06	1.83497e+06	1.73774e+06		1.59307e+06	5.28716e+06	733870	7.01319e+06	1.24036e+06	1.25119e+06	6.51751e+06	6.38708e+06	1.69072e+07	7.97695e+06		6	10	166.528	406.471	0.409692	0.0866873	0.270361	0.0305764	0.0575079
P01889	HLA class I histocompatibility antigen, B alpha chain OS=Homo sapiens OX=9606 GN=HLA-B PE=1 SV=3	916684	988745	177718	1.46446e+07	1.54211e+06	1.5459e+07	2.56825e+06	1.0566e+07	8.72391e+06	5.35215e+06	3.10168e+06	3.17871e+06	1.28479e+06	4.71834e+06	3.21087e+06	2.35859e+06	8.4841e+06	5.36519e+06	1.50185e+07	1.02265e+07		10	10	396.02	500.275	0.791604			0.739364	0.810732
Q86YZ3	Hornerin OS=Homo sapiens OX=9606 GN=HRNR PE=1 SV=2	1.22488e+07	2.01143e+07	1.90231e+07	3.99651e+07	5.4508e+06		4.68174e+07	7.89637e+07	1.41533e+07	1.69139e+07	380669	398997	38416.8	292241	461639	569672	534344	5.74336e+06	1.17455e+06	372527		9	10	1902.31	182.169	10.4425	1	1.0678	0.00361051	0.00976558
Q9Y6R7	IgGFc-binding protein OS=Homo sapiens OX=9606 GN=FCGBP PE=1 SV=3	5.60346e+09	5.57658e+09	9.07566e+09	1.63748e+10	5.58094e+09	2.86869e+10	7.32458e+09	4.94522e+09	8.13469e+09	6.00821e+09	2.15165e+08	8.54624e+08	6.4421e+07	2.2384e+09	2.22079e+08	2.26801e+08	2.35821e+09	1.85164e+09	2.64937e+09	3.6188e+08		10	10	666639	3508.22	1000			1.08251e-05	0.000146396
P17301	Integrin alpha-2 OS=Homo sapiens OX=9606 GN=ITGA2 PE=1 SV=1				184483	101880						47093.2				412942	96795.3	293095		379771	139440		5	7	14.3181	21.6268	0.662056	0.649917	0.926352	0.0802767	0.130278
P23229	Integrin alpha-6 OS=Homo sapiens OX=9606 GN=ITGA6 PE=1 SV=5	595372	558305	779351	2.82922e+06	2.68278e+06	2.48032e+06	964121	1.97255e+06	1.39459e+06	5.10465e+06	877542	890577	1.45389e+06	2.66583e+06	1.08411e+06	466856	2.25802e+06	1.25711e+06	6.3506e+06	1.87805e+06		10	10	168.357	88.406	1.90436			0.853428	0.901017
P08514	Integrin alpha-IIb OS=Homo sapiens OX=9606 GN=ITGA2B PE=1 SV=3	6.19522e+06	4.70799e+06	5.61687e+06	3.03684e+07	5.11504e+06	7.37301e+06	1.58757e+07	6.22373e+07	6.22183e+07	8.74592e+06	2.62488e+07	2.40499e+07	4.32283e+07	5.12614e+07	2.83689e+07	6.25337e+06	7.32384e+07	2.4971e+07	1.73328e+08	7.12099e+07		10	10	805.947	630.199	1.27888			0.035463	0.0649773
P05556	Integrin beta-1 OS=Homo sapiens OX=9606 GN=ITGB1 PE=1 SV=2	982739	387537	1.229e+06	1.80544e+06	123241	864694	483152	344274	2.77162e+06	1.82708e+06	2.75623e+06	1.71054e+06	7.37847e+06	3.24256e+06	2.60287e+06	2.01481e+06	3.92141e+06	2.40591e+06	7.35811e+06	5.51886e+06		10	10	92.3716	736.829	0.125364			0.000487129	0.00230574
P05106	Integrin beta-3 OS=Homo sapiens OX=9606 GN=ITGB3 PE=1 SV=2	3.08659e+06	4.64231e+07	4.08339e+06	3.13054e+07	4.11082e+06	1.53401e+08	1.6224e+07	1.87604e+07	3.77993e+07	9.50775e+06	1.61764e+07	1.81181e+07	2.34898e+07	3.7239e+07	2.04683e+07	6.1229e+06	5.0599e+07	1.33486e+07	1.08267e+08	5.11286e+07		10	10	1749.22	736.829	2.37398			0.393048	0.475003
Q13418	Integrin-linked protein kinase OS=Homo sapiens OX=9606 GN=ILK PE=1 SV=2			119901	903516				2.95226e+06	1.1626e+06		626995	417020	1.91072e+06	1.35595e+06	1.91944e+06	202994	1.35125e+06	94347.4	2.06367e+06	3.34869e+06		4	10	103.306	473.579	0.218138	0.0108359	0.0726237	0.0158158	0.0340278
P19827	Inter-alpha-trypsin inhibitor heavy chain H1 OS=Homo sapiens OX=9606 GN=ITIH1 PE=1 SV=3	2.98549e+07	1.05196e+07	1.84298e+07	6.43708e+07	4.57342e+08	3.48984e+07	3.21367e+07	1.92254e+08	2.7274e+07	2.48284e+07	8.98173e+07	1.18433e+08	7.00177e+07	4.98629e+07	8.85062e+07	9.25877e+07	7.5528e+07	1.32547e+08	9.81551e+07	9.32508e+07	1	10	10	3099.58	2660.58	1.165			0.0288056	0.0552755
P19823	Inter-alpha-trypsin inhibitor heavy chain H2 OS=Homo sapiens OX=9606 GN=ITIH2 PE=1 SV=2	8.70681e+07	1.2129e+07	3.36485e+07	3.09765e+08	1.84007e+08	1.10137e+08	1.14098e+08	7.7463e+08	6.12624e+07	5.55641e+07	2.09593e+08	1.78043e+08	1.47219e+08	4.54729e+07	1.92881e+08	2.03223e+08	1.02687e+08	1.86395e+08	1.64577e+08	2.60141e+08	1	10	10	9860.23	11056	0.891846			0.190316	0.259854
Q06033	Inter-alpha-trypsin inhibitor heavy chain H3 OS=Homo sapiens OX=9606 GN=ITIH3 PE=1 SV=2	373397	29341.3	550547	466328	1.77413e+06	3.05276e+06	1.55877e+06	2.67409e+07	81332.1		2.95623e+06	2.38523e+06	6.84354e+06	2.31716e+06	1.69507e+06	2.82953e+06	3.90601e+06	6.03566e+06	2.94543e+06	4.63986e+06	1	9	10	55.0547	2615.82	0.0210468	1	1.06419	0.0114962	0.0267617
Q14624	Inter-alpha-trypsin inhibitor heavy chain H4 OS=Homo sapiens OX=9606 GN=ITIH4 PE=1 SV=4	4.5402e+07	8.68802e+07	3.86003e+06	3.68401e+07	4.57007e+06	7.62724e+06	4.05883e+07	3.04469e+07	1.12436e+08	7.13589e+07	2.51561e+07	2.13326e+07	3.37982e+07	1.63247e+07	2.97081e+07	2.59657e+07	2.89217e+07	3.9319e+07	2.96974e+07	3.57421e+07	1	10	10	3871.42	1158.41	3.34202			0.247451	0.319436
P13598	Intercellular adhesion molecule 2 OS=Homo sapiens OX=9606 GN=ICAM2 PE=1 SV=2						1.3667e+06						74460.9				83367.5		424038	1.00343e+06			1	4	136.67	2556.09	0.0534685	0.303406	0.673048
Q01629	Interferon-induced transmembrane protein 2 OS=Homo sapiens OX=9606 GN=IFITM2 PE=1 SV=2												760257	544735	269079	549741	489273	630881	484632	661273	981385		0	9	0.01	54.4735	0.001	0.000119076	0.00625149	0.000231246	0.00128772
P14923	Junction plakoglobin OS=Homo sapiens OX=9606 GN=JUP PE=1 SV=3		1.56649e+07		1.15974e+06	2.04003e+06	1.61346e+06		1.78023e+06		2.87353e+06								394880				6	1	191.013	54.7238	3.49049	0.0572755	0.209788	0.014719	0.0321554
Q9Y624	Junctional adhesion molecule A OS=Homo sapiens OX=9606 GN=F11R PE=1 SV=1				8.25182e+06	586038						77609.1	504793	377651	659659	363273		910907	294882	1.49258e+06	1.28542e+06		2	9	441.893	44.9837	9.82341	0.00547749	0.0420832	0.0193896	0.0410944
P29622	Kallistatin OS=Homo sapiens OX=9606 GN=SERPINA4 PE=1 SV=3					20718.7		18344.3	2.20224e+06				36750.3						56642.3	40640.5		1	3	3	2.07187	37.0462	0.0559268	1	1.35776
Q9P2N6	KAT8 regulatory NSL complex subunit 3 OS=Homo sapiens OX=9606 GN=KANSL3 PE=1 SV=2		716889		759457	564620					747222							186231					4	1	73.2055	4.86414	15.05	0.303406	0.668341
Q14532	Keratin, type I cuticular Ha2 OS=Homo sapiens OX=9606 GN=KRT32 PE=1 SV=3	4.06396e+06	1.80344e+06	4.76162e+06	3.1667e+06	3.17559e+06	3.22296e+06		1.31919e+06	1.35095e+06	1.79377e+06			2.40109e+06			692087						10	5	316.67	69.2087	4.57558	0.0325077	0.131281	0.0017452	0.00576321
P13645	Keratin, type I cytoskeletal 10 OS=Homo sapiens OX=9606 GN=KRT10 PE=1 SV=6	9.17222e+08	1.07501e+10	7.73205e+08	1.84059e+09	4.32608e+09	4.49409e+08	1.4192e+09	1.38799e+09	6.40519e+08	9.40928e+08	3.68428e+07	6.22201e+07	2.02435e+07	1.72213e+07	3.14139e+07	4.01464e+07	3.22882e+07	4.83763e+07	3.96193e+07	1.67259e+07		10	10	116446	3185.1	36.5595			1.08251e-05	0.000146396
P02533	Keratin, type I cytoskeletal 14 OS=Homo sapiens OX=9606 GN=KRT14 PE=1 SV=4	8.4848e+07	2.06194e+08	5.40418e+07	8.17309e+07	8.87322e+07	2.69454e+07	3.73512e+07	2.75535e+07	3.40785e+07	1.20232e+08	1.22725e+06	4.60881e+07	1.28678e+06	2.26455e+07	2.576e+06	1.18202e+06	5.46324e+07	1.83536e+08	6.9107e+07	2.3901e+06		10	7	6788.64	3185.1	2.13137	0.210526	0.526316	0.0432571	0.0763044
P19012	Keratin, type I cytoskeletal 15 OS=Homo sapiens OX=9606 GN=KRT15 PE=1 SV=3	3.11775e+06	5.79951e+07		4.68517e+06	2.8538e+06	1.73609e+06	2.81532e+06	6.40249e+06										380123				7	1	311.775	257.6	1.21031	0.0197666	0.103775	0.00486867	0.0124568
P08779	Keratin, type I cytoskeletal 16 OS=Homo sapiens OX=9606 GN=KRT16 PE=1 SV=4	8.75102e+06	1.04422e+06	5.34092e+06	6.10081e+06	6.41324e+06	825890	881102		642192	2.97906e+07		3.86757e+06		3.97799e+06			9.91033e+06	2.32321e+07	8.97789e+06			9	5	534.092	647.794	0.824478	0.140867	0.399757	0.443631	0.52716
Q04695	Keratin, type I cytoskeletal 17 OS=Homo sapiens OX=9606 GN=KRT17 PE=1 SV=2	5.16697e+06	9.49613e+06		1.78955e+06	2.65397e+06		1.78788e+06	815550	1.52314e+06	8.9731e+06		544320	236570									8	2	222.176	397.799	0.558513	0.0230141	0.115071	0.00245502	0.00711454
Q2M2I5	Keratin, type I cytoskeletal 24 OS=Homo sapiens OX=9606 GN=KRT24 PE=1 SV=1				9.14012e+06		5.48822e+06	2.05367e+07	6.80032e+06		1.91956e+07	469149	3.75502e+06	349079	5.64984e+06	213899		1.10419e+07	9.70554e+06	4.69235e+06	733840		5	9	914.012	73.384	12.4552	0.140867	0.396188	0.759277	0.819904
P35527	Keratin, type I cytoskeletal 9 OS=Homo sapiens OX=9606 GN=KRT9 PE=1 SV=3	8.52478e+08	1.50694e+09	5.15908e+08	1.48614e+09	1.04834e+09	5.70707e+08	6.51447e+08	9.17405e+08	7.45182e+08	5.81278e+08	1.1762e+07	2.07244e+07	9.09548e+06	1.75214e+07	1.61447e+07	1.13602e+07	2.70862e+07	5.09754e+08	6.55121e+07	4.94738e+06		10	10	79883	970.554	82.3066			1.08251e-05	0.000146396
P78386	Keratin, type II cuticular Hb5 OS=Homo sapiens OX=9606 GN=KRT85 PE=1 SV=1			5.77898e+06								341845	622833	8.81722e+06	1.80905e+06	122538	229826	1.15755e+06	761010	855642			0	5	577.898	881.722	0.65542	0.0325077	0.129619
O43790	Keratin, type II cuticular Hb6 OS=Homo sapiens OX=9606 GN=KRT86 PE=1 SV=1											158347		1.35144e+06							138365		0	3	0.01	69.1921	0.001	0.210526	0.522172
P04264	Keratin, type II cytoskeletal 1 OS=Homo sapiens OX=9606 GN=KRT1 PE=1 SV=6	1.91244e+09	6.6303e+09	1.14522e+09	2.98637e+09	3.60568e+09	1.04477e+09	1.9219e+09	2.2615e+09	1.41329e+09	1.09233e+09	1.26515e+08	8.33984e+07	1.04534e+08	3.29927e+07	1.347e+08	1.20712e+08	6.56412e+07	8.79415e+08	1.2774e+08	7.59741e+07		10	10	191717	8339.84	22.9881			1.08251e-05	0.000146396
P35908	Keratin, type II cytoskeletal 2 epidermal OS=Homo sapiens OX=9606 GN=KRT2 PE=1 SV=2	4.11621e+08	7.04497e+09	3.44233e+08	8.32646e+08	2.41765e+09	3.82822e+08	5.935e+08	9.801e+08	3.79165e+08	4.49393e+08	1.31433e+07	2.98301e+07	6.32553e+06	5.73887e+07	7.82756e+06	2.02685e+07	2.24686e+07	1.88213e+07	2.56566e+07	9.6463e+06		10	10	52144.6	4519.07	11.5388			1.08251e-05	0.000146396
P13647	Keratin, type II cytoskeletal 5 OS=Homo sapiens OX=9606 GN=KRT5 PE=1 SV=3	1.69381e+08	7.40394e+08	1.17384e+08	2.18834e+08	3.16477e+08	5.70055e+07	1.08403e+08	1.00776e+08	7.32659e+07	1.98569e+08	4.78975e+07	3.32665e+07	2.3748e+07	4.46086e+07	3.71359e+07	2.04976e+07	4.31766e+07	5.70881e+07	3.27112e+07	2.78989e+07		10	10	14338.2	2677.78	5.35452			2.16502e-05	0.000236487
P02538	Keratin, type II cytoskeletal 6A OS=Homo sapiens OX=9606 GN=KRT6A PE=1 SV=3	1.76157e+07	2.38107e+06	8.10623e+06	7.00754e+06	7.16738e+06	4.54609e+06	1.66406e+06	2.51106e+06	3.29294e+06	5.47273e+07		3.70301e+06	195262	2.36427e+06	183330	409548	869901	666947	919261	489403		9	3	577.681	2049.76	0.281829	0.0197666	0.102073	0.000768539	0.00316326
P04259	Keratin, type II cytoskeletal 6B OS=Homo sapiens OX=9606 GN=KRT6B PE=1 SV=5	1.04107e+06				905510					8.1354e+06				175118		303768			211406	265535		3	4	104.107	40.9548	2.54201	1	1.16667
Q8N1N4	Keratin, type II cytoskeletal 78 OS=Homo sapiens OX=9606 GN=KRT78 PE=1 SV=2	674525	1.3919e+07		1.92122e+06	1.17221e+07		870206	2.90939e+06						170786			185324	275342	1.33689e+06			6	4	241.531	23.847	10.1283	0.656282	0.922896	0.115258	0.171379
Q5T749	Keratinocyte proline-rich protein OS=Homo sapiens OX=9606 GN=KPRP PE=1 SV=1		3.3546e+06			6.83193e+06		2.23771e+06	2.85525e+06		2.05206e+06		247792						467970				5	2	285.525	26.1567	10.916	0.349845	0.72981
P01042	Kininogen-1 OS=Homo sapiens OX=9606 GN=KNG1 PE=1 SV=2	4.44727e+07	728910	1.90045e+07	1.50648e+07	3.68621e+07	7.56349e+07	4.76489e+07	5.00208e+07	4.46327e+07	6.23345e+06	4.36313e+07	4.08415e+07	2.93418e+07	3.9313e+07	4.05515e+07	8.64639e+07	3.41047e+07	5.07788e+07	5.59218e+07	5.27652e+07	1	10	10	4066.74	4069.65	0.999284			0.279861	0.35802
P02788	Lactotransferrin OS=Homo sapiens OX=9606 GN=LTF PE=1 SV=6		704973	254739	3.59902e+06	401011	3.25668e+06						407228		447253			420624		427172			5	4	70.4973	3993.23	0.0176542	1	1.13718
P24043	Laminin subunit alpha-2 OS=Homo sapiens OX=9606 GN=LAMA2 PE=1 SV=4																41471.9						0	1	0.01	42.0624	0.001	1	1.06061
Q14766	Latent-transforming growth factor beta-binding protein 1 OS=Homo sapiens OX=9606 GN=LTBP1 PE=1 SV=4				4.67877e+06			1.84734e+06	803767		430007	143359	138358		69404.4	527975	34035.2	422906	164068	407371	398081		4	9	132.556	15.3714	8.62353	0.0572755	0.207377	0.562405	0.651931
Q08722	Leukocyte surface antigen CD47 OS=Homo sapiens OX=9606 GN=CD47 PE=1 SV=1	397302		472023	3.71411e+06	288230	1.44722e+06	945413		908457	882346	125668						53749.9			1.29059e+06		8	3	89.5402	15.3714	5.82512	0.0697785	0.238916	0.0156401	0.0339068
P19397	Leukocyte surface antigen CD53 OS=Homo sapiens OX=9606 GN=CD53 PE=1 SV=1				954290		1.54899e+06					566557	1.2657e+06	434663		792014	426129	926338	489139	670720	656887		2	9	125.164	61.1722	2.04609	0.00547749	0.0410812	0.0357115	0.0645992
P16150	Leukosialin OS=Homo sapiens OX=9606 GN=SPN PE=1 SV=1								915596	591309	637728		1.26265e+06		670570			822526	499746	1.99755e+06			3	5	63.7728	67.0645	0.950917	0.649917	0.922179
P18428	Lipopolysaccharide-binding protein OS=Homo sapiens OX=9606 GN=LBP PE=1 SV=3	2.267e+06	3.23253e+06	1.06161e+07	1.29973e+06	534628	3.91333e+06	5.41849e+06	6.66851e+07	8.11366e+06	4.27522e+06	3.52278e+06	1.50565e+07	3.64249e+07	5.12505e+06	9.41515e+06	753767	1.83638e+07	2.16827e+07	2.93984e+07	2.98125e+07		10	10	409.427	512.505	0.798875			0.0892096	0.139975
P50851	Lipopolysaccharide-responsive and beige-like anchor protein OS=Homo sapiens OX=9606 GN=LRBA PE=1 SV=4				6.09123e+06										1.78233e+07					158168	82507.1		1	3	609.123	1505.65	0.404559	0.582043	0.868927
P00338	L-lactate dehydrogenase A chain OS=Homo sapiens OX=9606 GN=LDHA PE=1 SV=2												294233		337238					482318			0	3	0.01	31.5735	0.001	0.210526	0.518092
P07195	L-lactate dehydrogenase B chain OS=Homo sapiens OX=9606 GN=LDHB PE=1 SV=2	1.76408e+06		1.42753e+06	9.36556e+06	73790.7		771283	19821			482333	6.44887e+07	103844	5.56829e+07	165276	157333	3.45109e+07	3.88338e+07	2.957e+07			6	9	109.94	48.2325	2.27938	0.303406	0.6637	0.0521035	0.0886071
P61626	Lysozyme C OS=Homo sapiens OX=9606 GN=LYZ PE=1 SV=1		4.98676e+06		8.21852e+06	8.98484e+06	7.03555e+06					154977	87200.6	278644	121952			58163.5					4	5	762.704	12.1952	62.5413	1	1.13309
Q9UEW3	Macrophage receptor MARCO OS=Homo sapiens OX=9606 GN=MARCO PE=1 SV=1	668721						1.21529e+06				993049	1.61334e+06	593682	1.62008e+06	1.16661e+06	1.65316e+06	1.56347e+06	1.37471e+06	2.31273e+06	1.8372e+06		2	10	94.2005	116.661	0.807475	0.000714456	0.0132384	0.000380107	0.00192769
P48740	Mannan-binding lectin serine protease 1 OS=Homo sapiens OX=9606 GN=MASP1 PE=1 SV=3	5.83947e+06	986540	4.74116e+06	997401	6.49596e+06	809140	8.29411e+06	1.38319e+07	1.45185e+07	7.18874e+06	1.55817e+07	3.66409e+07	6.03622e+06	1.93508e+07	2.2929e+07	2.94576e+07	2.26742e+07	2.22547e+07	4.78418e+07	2.12357e+07		10	10	616.771	417.447	1.47748			0.000205677	0.00119209
O00187	Mannan-binding lectin serine protease 2 OS=Homo sapiens OX=9606 GN=MASP2 PE=1 SV=4	2.0913e+06	757810	707941	368216		1.60948e+06	1.2894e+06	2.02775e+06	985989	2.17035e+06	1.01691e+06	4.11123e+06	473399	4.17837e+06	1.85291e+06	2.68628e+06	5.17739e+06	3.4307e+06	4.51075e+06	1.601e+06		9	10	128.94	560.68	0.229971	1	1.05705	0.0232306	0.048511
P11226	Mannose-binding protein C OS=Homo sapiens OX=9606 GN=MBL2 PE=1 SV=2	718749	3.15019e+06		8.66363e+06		6.52318e+06	6.15804e+06	814352	393685	1.74313e+06	9.44986e+06	1.03703e+07	4.41034e+06	5.76336e+06	1.71779e+07	3.00035e+06	261249	1.59441e+07	7.84269e+06	7.20697e+06		8	10	244.666	429.436	0.569739	0.473684	0.810927	0.0226677	0.0476862
P43243	Matrin-3 OS=Homo sapiens OX=9606 GN=MATR3 PE=1 SV=2			21126.2									165278										1	1	2.11262	720.697	0.001	1	1.35193
Q9NR99	Matrix-remodeling-associated protein 5 OS=Homo sapiens OX=9606 GN=MXRA5 PE=1 SV=3	4.51558e+06	652452	1.548e+06	1.58775e+06	1.9846e+06		3.91292e+06		2.50943e+06	947290	1.85184e+06	1.86898e+06	2.19995e+06	2.08786e+06	2.7703e+06	4.15321e+06	1.61507e+06	3.65849e+06	1.70986e+06	1.27087e+06		8	10	178.618	186.898	0.955694	0.473684	0.806543	0.212122	0.28551
Q658P3	Metalloreductase STEAP3 OS=Homo sapiens OX=9606 GN=STEAP3 PE=1 SV=2											733281		692391		259783	1047737				646892		0	5	0.01	170.986	0.001	0.0325077	0.127999
P26038	Moesin OS=Homo sapiens OX=9606 GN=MSN PE=1 SV=3	3.36262e+06	1.94925e+06	2.06694e+06	1.18693e+07	9.97246e+06	1.21713e+07	6.90719e+06	1.41078e+07	2.44086e+06	2.79195e+06	2.44478e+06	1.08944e+07	7.23483e+06	4.70773e+06	1.96137e+06	1.47847e+06	6.56136e+06	8.53544e+06	8.53567e+06	2.51717e+06		10	10	513.491	244.478	2.10036			0.578742	0.668141
P15941	Mucin-1 OS=Homo sapiens OX=9606 GN=MUC1 PE=1 SV=3											26864.2	56541.3	39844.7	98064.1	101714	60590	58733.9	243717	85929.1	106886		0	10	0.01	86.1092	0.001	1e-05	0.00105	6.38644e-05	0.000604583
Q9HC84	Mucin-5B OS=Homo sapiens OX=9606 GN=MUC5B PE=1 SV=3												250511						379815	1.66017e+06			0	3	0.01	9.80641	0.001	0.210526	0.514076
Q13201	Multimerin-1 OS=Homo sapiens OX=9606 GN=MMRN1 PE=1 SV=3	7.74942e+06	1.23495e+07	1.03932e+07	1.50426e+07	5.55648e+06	1.70306e+07	9.1167e+06	2.51246e+07	1.45877e+07	6.36958e+06	4.98836e+06	2.14202e+06	7.27737e+06	3.53271e+06	4.08721e+06	2.1018e+06	9.11476e+06	5.41371e+06	2.99233e+07	7.45993e+06		10	10	1137.13	408.721	2.78218			0.0114962	0.0265442
P60660	Myosin light polypeptide 6 OS=Homo sapiens OX=9606 GN=MYL6 PE=1 SV=2				756916				188449	210758	59805.4	303074	2.6696e+06	981387	1.17165e+06	1.20611e+06	1.84558e+06	1.46541e+06	1.81691e+06	3.78598e+06	3.15564e+06		4	10	19.9604	164.116	0.121624	0.0108359	0.0711107	0.000202827	0.00120006
O14950	Myosin regulatory light chain 12B OS=Homo sapiens OX=9606 GN=MYL12B PE=1 SV=2	1.57004e+06	2.27479e+06	1.60872e+06		1.51473e+06		1.00149e+06	196008	3.93321e+06	3.75986e+06	2.17798e+06	435711	1.58459e+06	174859	3.2411e+06	72783.7	310569	387525	538878	2.33906e+06		9	10	158.938	133.576	1.18987	1	1.05351	0.722531	0.801558
P35579	Myosin-9 OS=Homo sapiens OX=9606 GN=MYH9 PE=1 SV=4	3.09521e+07	4.6444e+07	6.01792e+07	9.24739e+07	5.15824e+07	1.29972e+08	6.52619e+07	7.2901e+07	5.05713e+07	5.40122e+07	3.1349e+07	4.95949e+07	2.49457e+07	1.58208e+07	5.36535e+07	2.42809e+07	2.64411e+07	3.65068e+07	5.16722e+07	4.93032e+07		10	10	5709.57	953.094	5.99056			0.00519604	0.0131757
P00387	NADH-cytochrome b5 reductase 3 OS=Homo sapiens OX=9606 GN=CYB5R3 PE=1 SV=3					47525.9			77035			5.34572e+06	112891	2.01237e+07		7.12192e+06	5990850				6.32585e+06		2	6	6.22805	2461.33	0.001	0.169802	0.45716	0.0295786	0.0560021
P59665	Neutrophil defensin 1 OS=Homo sapiens OX=9606 GN=DEFA1 PE=1 SV=1				907177																		1	0	90.7177	615.835	0.147308	1	1.05
P49321	Nuclear autoantigenic sperm protein OS=Homo sapiens OX=9606 GN=NASP PE=1 SV=2			4.19058e+06	2.39398e+07		226208						268081		39163.5								3	2	419.058	15.3622	27.2784	1	1.2753
P51843	Nuclear receptor subfamily 0 group B member 1 OS=Homo sapiens OX=9606 GN=NR0B1 PE=1 SV=2	9.03615e+07	1.56298e+07	1.40644e+08	9.50739e+07	1.62441e+08	2.95725e+08	1.02476e+08	1.06549e+08	4.34909e+07	8.57329e+07	2.17193e+07	1.96457e+07	6.93328e+07	4.41225e+07	1.50566e+08	56053304	1.07408e+08	6.24669e+07	5.00151e+07	4.51096e+07		10	10	9877.5	4756.24	2.07675			0.123005	0.181003
P19338	Nucleolin OS=Homo sapiens OX=9606 GN=NCL PE=1 SV=3			2.31581e+06	1.09647e+07								368392										2	1	664.023	5001.51	0.132764	1	1.2069
P06748	Nucleophosmin OS=Homo sapiens OX=9606 GN=NPM1 PE=1 SV=2			4.30308e+06	2.18677e+07																		2	0	1308.54	36.8392	35.5203	0.473684	0.802207
Q9H1P3	Oxysterol-binding protein-related protein 2 OS=Homo sapiens OX=9606 GN=OSBPL2 PE=1 SV=1	1.04794e+06	4.50176e+06	6.13418e+06	1.244e+06					1.5509e+07	971398	4.31508e+06	3.73527e+06	5.76158e+06	3.09716e+06	4.82992e+06	4.95813e+06	2.80156e+06	4.65142e+06	3.21933e+06	4.19036e+06		6	10	287.288	425.272	0.67554	0.0866873	0.267711	0.074562	0.123834
P62937	Peptidyl-prolyl cis-trans isomerase A OS=Homo sapiens OX=9606 GN=PPIA PE=1 SV=2				623419		191947					2.91212e+06	1.45286e+06	2.68953e+06	2.00241e+06	3.9632e+06	3.6635e+06	2.02519e+06	361133	1.5984e+06	4.01551e+06		2	10	40.7683	344.141	0.118464	0.000714456	0.012503	0.000151974	0.00102763
Q06830	Peroxiredoxin-1 OS=Homo sapiens OX=9606 GN=PRDX1 PE=1 SV=1	338319	2.8045e+06	1.32413e+06	6.8509e+06	1.06906e+06		271942		690437	739364	110258	769566		2.65523e+06		333474				102455		2	0	90.4211	200.241	0.451561	0.473684	0.797917
P32119	Peroxiredoxin-2 OS=Homo sapiens OX=9606 GN=PRDX2 PE=1 SV=5			2.54785e+06	1.40159e+07	23731.4	353714		115689		387142												6	0	37.0428	33.3474	1.11081	0.0108359	0.0696594	0.00597196	0.014621
P30041	Peroxiredoxin-6 OS=Homo sapiens OX=9606 GN=PRDX6 PE=1 SV=3			1.49567e+06	5.42887e+06								191753						51862.8				2	2	346.227	12.1808	28.424	1	1.34615
P37231	Peroxisome proliferator-activated receptor gamma OS=Homo sapiens OX=9606 GN=PPARG PE=1 SV=3								4.35554e+06														1	0	435.554	12.1808	35.7575	1	1.04651
Q92835	Phosphatidylinositol 3,4,5-trisphosphate 5-phosphatase 1 OS=Homo sapiens OX=9606 GN=INPP5D PE=1 SV=2						1.27198e+07						1.08688e+06		1.17659e+06			746637	988184	339868			1	5	1271.98	98.8184	12.8719	0.140867	0.392682
Q9NTJ5	Phosphatidylinositol-3-phosphatase SAC1 OS=Homo sapiens OX=9606 GN=SACM1L PE=1 SV=2													163424		170483							0	2	0.01	74.6637	0.001	0.473684	0.793673
P00558	Phosphoglycerate kinase 1 OS=Homo sapiens OX=9606 GN=PGK1 PE=1 SV=3			1.58552e+06	7.75914e+06																		2	0	467.233	16.6954	27.9858	0.473684	0.789474
P55058	Phospholipid transfer protein OS=Homo sapiens OX=9606 GN=PLTP PE=1 SV=1				896743			1.56485e+06				1.83274e+06	447932	2.74723e+06	1.39538e+06	1.31406e+06	1.12807e+06	1.46726e+06	355234	1.68387e+06	2.26843e+06		7	10	123.08	143.132	0.859905	0.210526	0.510121	0.00119059	0.00433496
P03952	Plasma kallikrein OS=Homo sapiens OX=9606 GN=KLKB1 PE=1 SV=1	2.27669e+08	1.86114e+08	2.26633e+08	2.31704e+08	8.54964e+07	5.03041e+08	1.32088e+08	577335	1.75077e+08	1.14069e+08	1.08389e+07	1.25884e+07	3.84541e+06	1.31728e+07	8.19487e+06	1.10931e+07	1.4995e+07	1.81406e+07	1.36898e+07	5.11303e+06	1	10	10	18059.5	329.632	54.7869			0.00282727	0.00787201
P05155	Plasma protease C1 inhibitor OS=Homo sapiens OX=9606 GN=SERPING1 PE=1 SV=2	6.71055e+07	1.95261e+07	1.11827e+08	2.88498e+07	1.06174e+08	1.90532e+08	1.1863e+08	8.1619e+07	4.94917e+07	7.44811e+07	5.75168e+07	3.00061e+08	6.43838e+07	1.62388e+08	6.06888e+07	6.36684e+07	1.85528e+08	3.47515e+08	2.097e+08	6.47864e+07	1	10	10	7805	3782.87	2.06325			0.352681	0.435485
P00747	Plasminogen OS=Homo sapiens OX=9606 GN=PLG PE=1 SV=2				2.87688e+06							673384	6.68917e+06	911912	5.1231e+06	1.89388e+06	2.11735e+06	3.12194e+06	1.23008e+07	5.01821e+06	788767	1	1	10	287.688	3490.88	0.0824113	0.000119076	0.00535842	0.000420701	0.00205998
P02775	Platelet basic protein OS=Homo sapiens OX=9606 GN=PPBP PE=1 SV=3									401968	585020	414190	212569		211991	330720	260862	427431	515683	452514			2	8	49.3494	73.1076	0.675025	0.0230141	0.113273	0.0394363	0.0708855
P16284	Platelet endothelial cell adhesion molecule OS=Homo sapiens OX=9606 GN=PECAM1 PE=1 SV=2	2.59868e+06	6.54309e+06	1.95732e+06	2.5354e+07	4.34543e+06	4.7953e+06	6.943e+06	3.52517e+06	3.42186e+06	1.87347e+06	2.36456e+06	717900	3.30977e+06	1.66729e+06	2.58004e+06	2.29099e+06	3.4414e+06	3.03518e+06	3.56202e+06	3.38502e+06		10	10	393.53	119.259	3.29978			0.0539026	0.091121
P10720	Platelet factor 4 variant OS=Homo sapiens OX=9606 GN=PF4V1 PE=1 SV=1											1.59963e+06		787125	3.0062e+06	1.01174e+06	157441	1.5087e+06	1.31396e+06	3.22385e+06	1.19243e+06	1	0	9	0.01	229.099	0.001	0.000119076	0.00468862	0.000231246	0.00126296
P16671	Platelet glycoprotein 4 OS=Homo sapiens OX=9606 GN=CD36 PE=1 SV=2	1.01434e+06		754962	1.56738e+07	3.27832e+06		6.19841e+06	3.712e+06	1.71601e+07	1.12377e+06	3.84967e+06	7.01754e+06	6.2154e+06	9.64204e+06	2.08339e+06	1.51705e+06	8.28161e+06	3.53084e+06	2.51256e+07	1.24675e+06		8	10	349.516	208.339	1.67763	0.473684	0.785319	0.138691	0.20096
P07359	Platelet glycoprotein Ib alpha chain OS=Homo sapiens OX=9606 GN=GP1BA PE=1 SV=2	1.74991e+06	1.66282e+06	274293	2.37327e+06	1.04683e+06	534101	4.327e+06		1.31961e+07	5.69156e+06	2.5482e+06	2.43103e+06	2.55917e+06	4.01625e+06	2.09595e+06	1.146e+06	6.96965e+06	2.99278e+06	2.24824e+07	9.10772e+06		9	10	174.991	369.026	0.474197	1	1.04305	0.088973	0.141957
P13224	Platelet glycoprotein Ib beta chain OS=Homo sapiens OX=9606 GN=GP1BB PE=1 SV=1	787877			1.29278e+06	363778		139686		1.05883e+06	1.34348e+06	2.61054e+06	522845	2.02308e+06	565340	1.09054e+06	665054	1.46614e+06	972539	6.16443e+06	4.8279e+06		8	10	92.3354	248.962	0.370882	0.473684	0.781207	0.0106844	0.0250773
P14770	Platelet glycoprotein IX OS=Homo sapiens OX=9606 GN=GP9 PE=1 SV=3				381986			265122		2.03349e+06	1.19162e+06	1.16192e+06	1.24646e+06	978497	1.13307e+06	1.34548e+06	1.05952e+06	1.29062e+06	1.51256e+06	6.38772e+06	4.26229e+06		4	10	78.6803	126.854	0.620244	0.0108359	0.0682663	0.0040687	0.0106992
Q13093	Platelet-activating factor acetylhydrolase OS=Homo sapiens OX=9606 GN=PLA2G7 PE=1 SV=1								170655			1.30715e+06		1.14858e+06		2.0507e+06	1.68429e+06				1.20547e+06		1	5	17.0655	129.062	0.132227	0.140867	0.389237
Q86SQ0	Pleckstrin homology-like domain family B member 2 OS=Homo sapiens OX=9606 GN=PHLDB2 PE=1 SV=2	1.42637e+08	1.39725e+07	1.54179e+08	4.73841e+07	2.43348e+08	9.41911e+07	1.95651e+08	2.17744e+08	4.4414e+07	1.06831e+08	4.23747e+07	4.84942e+07	2.20474e+07	4.13014e+07	3.89662e+07	38743061	4.90157e+07	1.33358e+08	7.51755e+07	3.77972e+07		10	10	12473.4	3874.31	3.21952			0.0257481	0.0514962
P08567	Pleckstrin OS=Homo sapiens OX=9606 GN=PLEK PE=1 SV=3		591498	751833								185313	173647	676630	736571	176762	135758	853878	124406	1.14843e+06	817572		2	10	67.1665	1159.79	0.0579125	0.000714456	0.0118449	0.00340352	0.00929423
Q15365	Poly(rC)-binding protein 1 OS=Homo sapiens OX=9606 GN=PCBP1 PE=1 SV=2			612123	4.20448e+06								162036										2	1	240.83	18.5313	12.9958	1	1.20229
Q9P0L9	Polycystic kidney disease 2-like 1 protein OS=Homo sapiens OX=9606 GN=PKD2L1 PE=1 SV=1	2.66903e+08	2.15271e+08	3.94436e+08	4.71931e+08	3.02373e+08	1.84802e+09	2.94973e+08	1.16952e+08	1.27717e+08	1.90962e+08		2.7482e+07		1.90627e+07			2.77611e+07	7.59787e+07	8.89875e+07			10	5	28093.8	2762.15	10.171	0.0325077	0.126419	0.000163049	0.00105241
P01833	Polymeric immunoglobulin receptor OS=Homo sapiens OX=9606 GN=PIGR PE=1 SV=4	2.15332e+08	2.57861e+08	2.67558e+08	3.11642e+08	1.40121e+08	4.02707e+08	2.11995e+08	9.44126e+06	3.27289e+08	3.37686e+08	1.5775e+07	9.84626e+06	3.52576e+07	1.49493e+07	3.05883e+07	5.59597e+07	1.99255e+07	2.92419e+07	1.9286e+07	1.69735e+07		10	10	26270.9	2748.2	9.55934			0.00150469	0.00521136
P26599	Polypyrimidine tract-binding protein 1 OS=Homo sapiens OX=9606 GN=PTBP1 PE=1 SV=1			2.08854e+06	1.66871e+07	136024							489595										3	1	208.854	1928.6	0.108293	0.582043	0.864829
P08397	Porphobilinogen deaminase OS=Homo sapiens OX=9606 GN=HMBS PE=1 SV=2			1.45573e+06	6.51488e+06					565849													3	0	145.573	48.9595	2.97334	0.210526	0.506227
O75915	PRA1 family protein 3 OS=Homo sapiens OX=9606 GN=ARL6IP5 PE=1 SV=1																			42848	22063.6		0	2	0.01	3.24558	0.001	0.473684	0.777138
P20742	Pregnancy zone protein OS=Homo sapiens OX=9606 GN=PZP PE=1 SV=4	1.12425e+07		3.65752e+06	3.84688e+07	566259	8.77049e+06	1.41629e+07	2.39911e+07	4.42123e+06	2.7328e+06	2.10543e+07	6.19958e+06	2.49054e+07	1.6561e+07	594172	1.08908e+07	2.46726e+07	1.32041e+07	1.14305e+07	1.38263e+07		9	10	877.049	1231.73	0.712045	1	1.0396	0.190316	0.258611
Q9UHG3	Prenylcysteine oxidase 1 OS=Homo sapiens OX=9606 GN=PCYOX1 PE=1 SV=3	1.13415e+09	1.25704e+09	1.61533e+09	1.9425e+08	9.69736e+07	1.55902e+07	7.16662e+08	8.13786e+06	1.88932e+09	1.07677e+09	1.57747e+07	4.09451e+07	8.21223e+06	3.14068e+06	1.04998e+07	6.42432e+06	4.24775e+06	1.24641e+07	1.00298e+07	1.7138e+07		10	10	89671.6	1194.73	75.056			0.00150469	0.00514857
Q5H9U9	Probable ATP-dependent RNA helicase DDX60-like OS=Homo sapiens OX=9606 GN=DDX60L PE=2 SV=2											595504		363090		1.25154e+06	135781				810094		0	5	0.01	642.432	0.001	0.0325077	0.124877
A0A0C4DH35	Probable non-functional immunoglobulin heavy variable 3-35 OS=Homo sapiens OX=9606 GN=IGHV3-35 PE=1 SV=1																10965660					1	0	1	0.01	70.2799	0.001	1	1.03618
A0A0C4DH36	Probable non-functional immunoglobulin heavy variable 3-38 OS=Homo sapiens OX=9606 GN=IGHV3-38 PE=1 SV=1	372983		482199						766908		2.18166e+06	795079	2.97424e+06	1.46677e+06	3.621e+06	1.49032e+06	1.31801e+06	1.098e+06	784192	1.99469e+06	1	3	10	48.2199	149.032	0.323554	0.00309598	0.0295525	0.00013173	0.000959262
P0DTE1	Probable non-functional immunoglobulin heavy variable 3-38-3 OS=Homo sapiens OX=9606 GN=IGHV3-38-3 PE=1 SV=1			379989		78976.1						3.49852e+06	1.42655e+06	1.73088e+07	1.62875e+06	6.6839e+06	4.22675e+06	6.71539e+06	3.78817e+06	1.0223e+07	2.48236e+06	1	2	10	22.9482	233.201	0.0984053	0.000714456	0.0112527	0.000110671	0.000898014
A0A075B6R9	Probable non-functional immunoglobulin kappa variable 2D-24 OS=Homo sapiens OX=9606 GN=IGKV2D-24 PE=1 SV=1	2.99435e+07		1.18237e+08	2.07288e+07	4.29467e+07	3.59311e+07	2.59497e+07	9.05745e+06	1.87156e+07	2.12083e+07	8.22811e+07	3.78295e+07	1.40197e+08	7.99873e+07	1.28604e+08	9.97221e+07	1.1161e+08	5.63009e+07	1.05597e+08	7.19093e+07	1	8	10	2594.97	2756.91	0.941261	0.473684	0.773112	0.00220222	0.00687286
A0A075B6I7	Probable non-functional immunoglobulin lambda variable 5-48 OS=Homo sapiens OX=9606 GN=IGLV5-48 PE=1 SV=2								287937					251394		187200	4425054		87007.6			1	1	4	28.7937	7594.83	0.001	0.303406	0.659122
P07737	Profilin-1 OS=Homo sapiens OX=9606 GN=PFN1 PE=1 SV=2	12500.2	33361.4	3.71115e+06	3.33248e+07	97593	466891		493784	4.5232e+06	32986.7	1.60703e+06	1.60055e+06	1.52135e+06	2.30908e+06	1.92406e+06	408120	2.05115e+06	843593	2.87693e+06	3.39671e+06		9	10	46.6891	160.379	0.291117	1	1.03279	0.190316	0.25738
P35232	Prohibitin OS=Homo sapiens OX=9606 GN=PHB PE=1 SV=1			895215	6.48369e+06								144423										2	1	368.945	160.703	2.29582	1	1.19772
Q07954	Prolow-density lipoprotein receptor-related protein 1 OS=Homo sapiens OX=9606 GN=LRP1 PE=1 SV=2			755538				409204	729065	648521	1.02312e+06	3.05891e+06	1.52718e+06	1.25019e+06	2.09499e+06	1.18359e+06	675785	2.29593e+06	2.98435e+06	2.2306e+06	2.17576e+06		5	10	72.9065	209.499	0.348004	0.0325077	0.123373	0.000397406	0.00198006
P27918	Properdin OS=Homo sapiens OX=9606 GN=CFP PE=1 SV=2		3.52393e+06		1.04002e+06	1.71436e+06			5.60534e+06		4.45369e+06	151996		546170		406768	2.88122e+07				554593	1	5	5	352.393	152.718	2.30748	1	1.34043
P23219	Prostaglandin G/H synthase 1 OS=Homo sapiens OX=9606 GN=PTGS1 PE=1 SV=2																			187479	97461.6		0	2	0.01	40.6768	0.001	0.473684	0.769126
P25788	Proteasome subunit alpha type-3 OS=Homo sapiens OX=9606 GN=PSMA3 PE=1 SV=2												100050	64508.4	81020.4	191262	140100		60125.4				0	6	0.01	9.87558	0.001	0.0108359	0.0669277	0.00597196	0.0148775
P28066	Proteasome subunit alpha type-5 OS=Homo sapiens OX=9606 GN=PSMA5 PE=1 SV=3			1.80419e+06	9.92267e+06																		2	0	586.343	9.05353	64.764	0.473684	0.765182
P60900	Proteasome subunit alpha type-6 OS=Homo sapiens OX=9606 GN=PSMA6 PE=1 SV=1	27202.6		2.50714e+06	1.27996e+07	81848.7	222867	154858	166498		176008												8	0	17.1253	0.01	1000	0.000714456	0.0107168	0.000751179	0.00323235
P16452	Protein 4.2 OS=Homo sapiens OX=9606 GN=EPB42 PE=1 SV=3		2.15969e+06		937512				699666			369871	1.18429e+07	306106	602929			744592	160602	860276			3	7	93.7512	60.2929	1.55493	0.178895	0.473547	0.258155	0.331746
P02760	Protein AMBP OS=Homo sapiens OX=9606 GN=AMBP PE=1 SV=1	1.9375e+06	356020	1.27148e+06	637113	312910	352242	2.35711e+06	2.43614e+06	459960	1.53488e+06	1.17161e+06	1.00453e+06	2.25563e+06	402290	2.25816e+06	1.35387e+07	1.04202e+06	1.52029e+06	771333	966059	1	10	10	95.4295	96.6059	0.987823			0.481251	0.564774
Q9BUN1	Protein MENT OS=Homo sapiens OX=9606 GN=MENT PE=1 SV=1	690193			568013		579045	903226				1.94063e+06	2.76052e+06	1.92943e+06	1.28653e+06	2.2618e+06	1.38892e+06	680530	1.17871e+06	1.21319e+06	1.64244e+06		4	10	63.4619	133.773	0.474401	0.0108359	0.0656406	0.000273846	0.00144023
Q9P258	Protein RCC2 OS=Homo sapiens OX=9606 GN=RCC2 PE=1 SV=2			1.62072e+06	7.63959e+06	111150																	3	0	162.072	151.568	1.0693	0.210526	0.502392
P05109	Protein S100-A8 OS=Homo sapiens OX=9606 GN=S100A8 PE=1 SV=1	555665	418488	757505				158312		572355			1.6924e+06	63110.2	1.15578e+06			1.0346e+06	806130	226068			5	6	55.5665	92.0366	0.603744	1	1.12903	0.405322	0.487761
P06702	Protein S100-A9 OS=Homo sapiens OX=9606 GN=S100A9 PE=1 SV=1			2.55651e+06	4.70651e+06	6.02372e+06			108357			1.22689e+06	4.03988e+06	4.66563e+06	2.08023e+06	1.40293e+06	1.17101e+06	2.09924e+06	1.92024e+06	1.60863e+06	824019		4	10	363.151	131.491	2.76179	0.0108359	0.0644021	0.099545	0.152815
Q08188	Protein-glutamine gamma-glutamyltransferase E OS=Homo sapiens OX=9606 GN=TGM3 PE=1 SV=4	1.35799e+06	3.80684e+07	1.58008e+06	7.42014e+06	1.01423e+07	6.16018e+06	3.81849e+06	2.21926e+06		1.9068e+06	261809	841306	610365	533314		167491	753107	242270	977186			9	8	381.849	107.41	3.55506	1	1.19318	0.00105003	0.00402986
Q92954	Proteoglycan 4 OS=Homo sapiens OX=9606 GN=PRG4 PE=1 SV=3	6.56676e+07	3.63221e+07	4.15403e+07	2.24289e+08	1.00088e+08	1.19998e+08	1.09052e+08	1.30492e+08	8.64188e+07	1.00124e+08	9.644e+07	1.28904e+08	6.28093e+07	8.45784e+07	1.04025e+08	1.59812e+08	1.30627e+08	1.03174e+08	1.41839e+08	1.86094e+08		10	10	10010.6	7369.38	1.3584			0.279861	0.356415
P00734	Prothrombin OS=Homo sapiens OX=9606 GN=F2 PE=1 SV=2	1.11756e+07	2.28157e+07	2.52586e+07	5.47553e+07	1.97575e+06	6.68187e+07	1.10393e+07	7.76606e+06	6.3709e+07	2.71966e+07	3.34774e+07	2.43559e+07	4.29547e+07	8.7484e+06	3.66719e+07	1.3603e+07	5.16532e+06	9.30175e+06	7.90179e+06	1.79308e+07	1	10	10	2403.71	5288.2	0.454543			0.528849	0.615545
Q14242	P-selectin glycoprotein ligand 1 OS=Homo sapiens OX=9606 GN=SELPLG PE=1 SV=1					3.14701e+06	3.84954e+06				2.51938e+06	855094	1.07285e+06	944987	709162	1.20729e+06	1.30706e+06	822140	576983	574122	1.00314e+06		3	10	314.701	90.004	3.49653	0.00309598	0.0286833	0.132039	0.192303
Q9H6N6	Putative uncharacterized protein MYH16 OS=Homo sapiens OX=9606 GN=MYH16 PE=1 SV=2	19752.9	174777	377383		24221		26836.8	282756	249590	82092.8	3.10226e+06	2.04251e+06	9.29757e+06	1.27985e+06	2.95722e+06	3.57704e+06	1.80722e+06	2.09737e+06	1.52715e+06	1.3184e+06		8	10	12.8435	129.346	0.0992958	0.473684	0.761278	0.000181651	0.00109764
P14618	Pyruvate kinase PKM OS=Homo sapiens OX=9606 GN=PKM PE=1 SV=4			1.34415e+06	6.17068e+06				225907	41778.4			71336.2					235632		444665			4	7	78.5027	180.722	0.434385	0.36985	0.737359	0.62566	0.716482
Q13283	Ras GTPase-activating protein-binding protein 1 OS=Homo sapiens OX=9606 GN=G3BP1 PE=1 SV=1			753839	4.7378e+06																		2	0	274.582	23.5632	11.653	0.473684	0.757414
P15153	Ras-related C3 botulinum toxin substrate 2 OS=Homo sapiens OX=9606 GN=RAC2 PE=1 SV=1	1.88994e+06	3.86752e+06		5.59314e+06	253168		374583		1.29259e+06	8.00686e+06		1.1524e+06		1.05109e+06	249021	101487	1.31933e+06	307238	1.48629e+06	346459		7	8	188.994	69.8776	2.70464	1	1.27016	0.431813	0.515272
P61026	Ras-related protein Rab-10 OS=Homo sapiens OX=9606 GN=RAB10 PE=1 SV=1		2.74922e+06		928101			706018	2.32068e+06	1.40579e+06		385543	1.02367e+06	529964	1.14587e+06	528169	111171	1.31898e+06	264196	3.8897e+06	1.78185e+06		5	10	140.579	77.6818	1.80968	0.0325077	0.121904	0.303825	0.385207
Q9H0U4	Ras-related protein Rab-1B OS=Homo sapiens OX=9606 GN=RAB1B PE=1 SV=1			332707				606005	415224	1.02469e+06		762240	1.64413e+06	705487	1.60562e+06	588902	621452	152108	377095	2.05208e+06	2.07269e+06		4	10	51.0614	73.3863	0.695789	0.0108359	0.0632095	0.0040687	0.010601
Q9H082	Ras-related protein Rab-33B OS=Homo sapiens OX=9606 GN=RAB33B PE=1 SV=1	644428			1.48137e+07							209588	629333	599143	667619	277365		786892			390841		2	7	772.907	59.9143	12.9002	0.0697785	0.241541	0.106627	0.160223
P61224	Ras-related protein Rap-1b OS=Homo sapiens OX=9606 GN=RAP1B PE=1 SV=1	3.84559e+06	2.29e+06	3.62817e+06	1.279e+07	2.23469e+06	4.81654e+06	5.85933e+06	1.37168e+07	1.47654e+07	6.62548e+06	9.32946e+06	6.60684e+06	1.2142e+07	1.29367e+07	6.24944e+06	1.69335e+06	1.34786e+07	7.09717e+06	2.00052e+07	1.0283e+07		10	10	533.794	624.944	0.854146			0.247451	0.322367
Q12913	Receptor-type tyrosine-protein phosphatase eta OS=Homo sapiens OX=9606 GN=PTPRJ PE=1 SV=3	1.06392e+06			1.3858e+06	1.08171e+06		520378	529682	2.14596e+06	1.07439e+06		176141		248756			355670		617544	309572		7	9	107.439	660.684	0.162618	0.582043	0.860768	0.0462231	0.0795598
P78509	Reelin OS=Homo sapiens OX=9606 GN=RELN PE=1 SV=3	5.70932e+06	774102	7.19236e+06	6.31343e+06	1.86339e+06	8.60102e+06		1.74961e+06	1.98112e+06	1.51799e+06	1.33803e+08		1.21116e+06	921359	1.30532e+06	1.9618e+06		43358.3	129517	3.90553e+06		9	8	198.112	61.7544	3.20806	1	1.18868	0.139868	0.201637
O75298	Reticulon-2 OS=Homo sapiens OX=9606 GN=RTN2 PE=1 SV=1											248961											0	1	0.01	121.116	0.001	1	1.02941
O95197	Reticulon-3 OS=Homo sapiens OX=9606 GN=RTN3 PE=1 SV=2	665200	2.0581e+06		4.66191e+06	1.0128e+06	2.03492e+06	506343	1.81199e+06	1.44872e+06		359887	1.84777e+06	110619	597153	191737	209977	690354	1.23319e+06	913188	637859		8	10	163.036	59.7153	2.73022	0.473684	0.753589	0.241145	0.320024
Q9NQC3	Reticulon-4 OS=Homo sapiens OX=9606 GN=RTN4 PE=1 SV=2												198849		205431					1.04293e+06	842218		0	4	0.01	61.7506	0.001	0.0866873	0.265112
Q93084	Sarcoplasmic/endoplasmic reticulum calcium ATPase 3 OS=Homo sapiens OX=9606 GN=ATP2A3 PE=1 SV=3	1.86976e+06	3.53191e+06	1.80127e+07	2.98635e+07	3.54592e+07	4.67062e+06	2.01209e+06	3.85083e+06	1.34323e+07	4.50457e+06	1.09585e+06	601106	778020	1.41886e+06	1.06865e+06	2.17627e+06	1.81905e+06	957541	2.155e+06	1.57887e+06		10	10	458.76	105.579	4.34519			0.000129901	0.000997078
P49908	Selenoprotein P OS=Homo sapiens OX=9606 GN=SELENOP PE=1 SV=3				2.973e+06	2.72217e+06	9.42825e+06		6.64817e+06			2.71335e+06	1.00546e+07	3.78187e+06	4.74467e+06	2.55113e+06	1.40651e+06	4.29704e+06	6.62659e+06	7.55174e+06	3.18027e+06		4	10	481.058	216.563	2.22133	0.0108359	0.0620602	0.0423462	0.0756373
P10124	Serglycin OS=Homo sapiens OX=9606 GN=SRGN PE=1 SV=3	555311	268945	264118		149847		300296	246141	1.18911e+06	357002	1.06511e+06	451922	1.27379e+06	1.04533e+06	2.5192e+06	405689	3.08468e+06	1.21025e+06	1.10361e+06	538214		8	10	28.462	253.517	0.112269	0.473684	0.749802	0.00103921	0.00404295
Q9NUV7	Serine palmitoyltransferase 3 OS=Homo sapiens OX=9606 GN=SPTLC3 PE=1 SV=3	1.26128e+09	2.23827e+08	5.36449e+08	8.28143e+08	1.73538e+09	7.10112e+08	1.50279e+09	1.48261e+09	5.16386e+08	1.09746e+09	7.85944e+08	7.39457e+08	5.11788e+08	1.00323e+09	1.05261e+09	8.80927e+08	9.38996e+08	9.59561e+08	7.86711e+08	1.08564e+09		10	10	96280.2	25743.6	3.73996			0.630529	0.719157
P02787	Serotransferrin OS=Homo sapiens OX=9606 GN=TF PE=1 SV=3	2.56722e+06	7.72374e+06	2.83307e+06	2.92246e+07	3.64775e+06	2.46901e+06	2.14147e+06	1.11348e+07	1.87557e+07	8.36665e+06	4.27815e+07	7.4381e+07	2.9128e+07	8.3151e+07	4.92389e+07	1.10363e+08	4.0293e+07	9.45913e+07	4.07709e+07	3.6708e+07	1	10	10	568.575	31107.5	0.0182777			2.16502e-05	0.000236487
P0DJI8	Serum amyloid A-1 protein OS=Homo sapiens OX=9606 GN=SAA1 PE=1 SV=1	2.19856e+06	730855	977538	3.02748e+06	1.79035e+06	1.071e+06	1.33861e+06	1.87913e+06	5.70022e+06		1.85984e+06	1.91517e+07	2.79206e+06	7.80759e+06		1.19937e+06	297581	1.06709e+06	1.56982e+06	624342	1	9	9	179.035	2912.8	0.0614649	1	1.33475	0.929724	0.94979
P35542	Serum amyloid A-4 protein OS=Homo sapiens OX=9606 GN=SAA4 PE=1 SV=2	1.29485e+08	1.05432e+08	5.54861e+07	1.80143e+08	1.5832e+08	5.74093e+07	8.74025e+07	2.00861e+08	1.27144e+08	9.15896e+07	9.58993e+07	6.29708e+08	9.22012e+07	1.11597e+08	7.44712e+07	5.89585e+07	4.84788e+07	5.97509e+07	2.0312e+08	1.69203e+08	1	10	10	11628.8	4847.88	2.39875			0.853428	0.89768
P02743	Serum amyloid P-component OS=Homo sapiens OX=9606 GN=APCS PE=1 SV=2	7.07944e+06			4.62255e+06		1.36845e+06	153552	2.09523e+06			1.84899e+07	3.14757e+07	1.95186e+07	4.37561e+07	2.99871e+07	1.67398e+07	2.53399e+07	2.80207e+07	1.78518e+07	1.85034e+07	1	9	10	209.523	4611.74	0.0454325	1	1.02606	0.000163049	0.00107688
P27169	Serum paraoxonase/arylesterase 1 OS=Homo sapiens OX=9606 GN=PON1 PE=1 SV=3	3.26894e+07	6.77048e+06	1.20039e+07	3.51998e+07	3.54679e+07	9.64479e+07	3.78678e+07	8.05146e+07	2.43484e+07	2.36176e+07	1.98803e+07	2.75458e+07	7.3844e+06	7.10914e+06	1.22521e+07	1.40045e+07	1.5778e+07	5.27744e+07	4.62885e+07	2.11615e+07	1	10	10	3394.46	1969.94	1.72312			0.190316	0.26111
P04278	Sex hormone-binding globulin OS=Homo sapiens OX=9606 GN=SHBG PE=1 SV=2	529781	101594	7.18739e+06	8.46423e+06	755341	2.10571e+07	3.22874e+06	7.15656e+07	1.7194e+06	497721	210940	200155	364682	1.01486e+06	589526	309947	1.88481e+06	6.22933e+06	7.97148e+06	97904.7		10	10	247.407	724.677	0.341403			0.121225	0.179311
Q9H299	SH3 domain-binding glutamic acid-rich-like protein 3 OS=Homo sapiens OX=9606 GN=SH3BGRL3 PE=1 SV=1												132059		257247			350899					0	3	0.01	35.0899	0.001	0.210526	0.498615
Q9NR45	Sialic acid synthase OS=Homo sapiens OX=9606 GN=NANS PE=1 SV=2			1.53502e+06	6.26198e+06																		2	0	389.85	25.7247	15.1547	0.473684	0.746053
A6NMB1	Sialic acid-binding Ig-like lectin 16 OS=Homo sapiens OX=9606 GN=SIGLEC16 PE=2 SV=3	4.99297e+08	7.51745e+07	2.36237e+08	6.14455e+07	2.78707e+08		3.93487e+08	5.76701e+08	2.10809e+08	4.52217e+08	239749	6.18404e+08		5.30903e+08	287072		7.05324e+08	7.53036e+08	3.82302e+08	605552		9	10	27870.7	45660.2	0.610394	1	1.02273	0.969805	0.983659
A1L4H1	Soluble scavenger receptor cysteine-rich domain-containing protein SSC5D OS=Homo sapiens OX=9606 GN=SSC5D PE=1 SV=3	2.55659e+07	5.71707e+06	3.0792e+07	5.54349e+07	1.99747e+07	1.56104e+07	2.32194e+07	6.73458e+06	2.87429e+07	5.15987e+07	3.67629e+07	3.65192e+07	2.84026e+07	3.42571e+07	4.08851e+07	5.12696e+07	6.05292e+07	5.07449e+07	4.23752e+07	4.25544e+07		10	10	2439.27	4246.48	0.574422			0.0232306	0.0481569
P11166	Solute carrier family 2, facilitated glucose transporter member 1 OS=Homo sapiens OX=9606 GN=SLC2A1 PE=1 SV=2		1.13809e+06	140677	577689		1.15011e+06	673922	242889	1.02857e+06	548121	345686	1.63274e+07	716189	2.84263e+06	532754	48077.8	2.38918e+06	1.59359e+06	2.56935e+06	1.31593e+06		8	10	62.5805	2236.5	0.0279815	0.473684	0.742341	0.0450738	0.0790182
P11169	Solute carrier family 2, facilitated glucose transporter member 3 OS=Homo sapiens OX=9606 GN=SLC2A3 PE=1 SV=1	835388			2.22731e+06	869788		957084	1.10901e+06	924105	719332	1.26694e+06	2.10553e+06	1.33322e+06	3.72008e+06	1.30809e+06	54023.6	3.64274e+06	1.27292e+06	5.31032e+06	3.19922e+06		7	10	92.4105	146.34	0.631476	0.210526	0.494894	0.00452543	0.0116838
P30626	Sorcin OS=Homo sapiens OX=9606 GN=SRI PE=1 SV=1											372756	943533	942586	1.20126e+06	267277		1.38807e+06	989611	1.63951e+06	791597		0	9	0.01	127.292	0.001	0.000119076	0.00416766	0.000231246	0.00123913
Q9Y5W7	Sorting nexin-14 OS=Homo sapiens OX=9606 GN=SNX14 PE=1 SV=3															145167							0	1	0.01	94.3059	0.001	1	1.01942
P02549	Spectrin alpha chain, erythrocytic 1 OS=Homo sapiens OX=9606 GN=SPTA1 PE=1 SV=5		1.82955e+06	5.46329e+06	3.56439e+06		3.38238e+06	1.79831e+06	9.10703e+06	1.91707e+06	1.95972e+06		4.96772e+06		1.03472e+07		708373		57817.7		973891		8	5	267.105	84.1132	3.17555	0.349845	0.725008	0.113343	0.169417
P11277	Spectrin beta chain, erythrocytic OS=Homo sapiens OX=9606 GN=SPTB PE=1 SV=5		3.04805e+06		5.74092e+06	28047.8	7.6441e+06	45671.6	4.46959e+06			1.80049e+06	6.66729e+06	402377	1.06907e+06	1.63672e+06	1.13035e+06	1.07354e+06	333554	227545	667464		6	10	375.882	106.907	3.51598	0.0866873	0.262563	0.340113	0.425516
Q01082	Spectrin beta chain, non-erythrocytic 1 OS=Homo sapiens OX=9606 GN=SPTBN1 PE=1 SV=2				2.52128e+06		2.88458e+06					457182	549113			1.06748e+06				218658	307002		2	5	270.293	66.7464	4.04955	0.349845	0.72027
Q8NHX4	Spermatogenesis-associated protein 3 OS=Homo sapiens OX=9606 GN=SPATA3 PE=2 SV=2	3.51618e+06	5.99031e+06		1.30485e+06		959017	1.94984e+06	1.46711e+06	4.15097e+06	1.08337e+07												8	0	273.301	45.7182	5.97795	0.000714456	0.0102297	0.000751179	0.0031841
A4D263	Spermatogenesis-associated protein 48 OS=Homo sapiens OX=9606 GN=SPATA48 PE=4 SV=2	1.54779e+07	3.13288e+07	2.38566e+07	2.4075e+06		1.89243e+06		5.18365e+07	1.11077e+07	2.89537e+07	1.55558e+06	595017	339005	483372	1.12261e+06	417586	684183	2.20287e+06	711465	865112		8	10	1966.72	69.7824	28.1837	0.473684	0.738666	0.0311456	0.058193
Q12874	Splicing factor 3A subunit 3 OS=Homo sapiens OX=9606 GN=SF3A3 PE=1 SV=1			929357	7.72536e+06								168109										2	1	432.736	68.4183	6.32485	1	1.18421
P27105	Stomatin OS=Homo sapiens OX=9606 GN=STOM PE=1 SV=3	5.8556e+06	3.92134e+06	522476	1.27878e+07	4.12147e+06	1.48606e+06	8.75081e+06	2.73546e+07	6.68226e+06	7.83939e+06	8.06757e+06	5.08305e+07	2.00786e+07	2.9807e+07	7.07078e+06	1.98118e+06	3.16437e+07	1.85918e+07	4.28895e+07	1.76419e+07		10	10	626.893	1859.18	0.337188			0.0146896	0.0325926
P38646	Stress-70 protein, mitochondrial OS=Homo sapiens OX=9606 GN=HSPA9 PE=1 SV=2																				259872		0	1	0.01	1859.18	0.001	1	1.01613
O00391	Sulfhydryl oxidase 1 OS=Homo sapiens OX=9606 GN=QSOX1 PE=1 SV=3				621557	933508		2.74313e+06	5.55357e+06			1.05216e+06	3.20508e+06	1.69392e+06	536568	628439	611826	2.47036e+06	5.05978e+06	3.24246e+06	1.78465e+06		4	10	183.832	169.392	1.08524	0.0108359	0.060952	0.0351428	0.0652324
P00441	Superoxide dismutase [Cu-Zn] OS=Homo sapiens OX=9606 GN=SOD1 PE=1 SV=2			1.19469e+06	6.46038e+06																		2	0	382.754	173.929	2.20064	0.473684	0.735027
Q6UWP8	Suprabasin OS=Homo sapiens OX=9606 GN=SBSN PE=1 SV=2	536150	8.45603e+07					584823						337561			200000		88330.1	286771	354138		3	5	58.4823	28.6771	2.03934	0.649917	0.918044
Q4LDE5	Sushi, von Willebrand factor type A, EGF and pentraxin domain-containing protein 1 OS=Homo sapiens OX=9606 GN=SVEP1 PE=1 SV=3						2.23123e+06		1.22967e+06	480661		479865	470456	697384		1.38176e+06	1.36817e+06	736378	1.24978e+06	1.24426e+06	3.72664e+06		3	9	122.967	58.8624	2.08905	0.0197666	0.100427	0.0235199	0.0477117
O75558	Syntaxin-11 OS=Homo sapiens OX=9606 GN=STX11 PE=1 SV=1											322740	282695		635658		171946	622739		1.15726e+06	228060		0	7	0.01	66.6521	0.001	0.00309598	0.0278638	0.00221254	0.00647796
Q9Y490	Talin-1 OS=Homo sapiens OX=9606 GN=TLN1 PE=1 SV=3	8.9301e+07	1.05668e+07	2.84935e+07	9.06711e+07	3.00444e+07	7.07182e+07	3.71203e+07	4.91915e+07	2.75909e+07	3.44132e+07	1.89694e+07	5.74335e+07	2.04833e+07	1.64152e+08	4.47332e+07	1.36109e+07	8.22262e+07	3.17557e+07	6.7427e+07	6.36902e+07		10	10	3576.68	1896.94	1.8855			0.911797	0.938226
Q7Z7G0	Target of Nesh-SH3 OS=Homo sapiens OX=9606 GN=ABI3BP PE=1 SV=1											1.18825e+06	857326	326103	2.05933e+06	1.05158e+06	480335	1.7785e+06	1.15113e+06	639194	742400		0	10	0.01	783.51	0.001	1e-05	0.0007875	6.38644e-05	0.000585081
P17987	T-complex protein 1 subunit alpha OS=Homo sapiens OX=9606 GN=TCP1 PE=1 SV=1			2.36335e+06	1.00137e+07								159234							303978			2	2	618.852	79.9863	7.73697	1	1.32911
P78371	T-complex protein 1 subunit beta OS=Homo sapiens OX=9606 GN=CCT2 PE=1 SV=4			1.0493e+07	5.69771e+07	115737		23875.6	75551.8		38139.2	82867.3	864646						33587.2	49377.1			6	4	9.56446	12.105	0.790121	0.656282	0.918795	0.352971	0.433956
P50991	T-complex protein 1 subunit delta OS=Homo sapiens OX=9606 GN=CCT4 PE=1 SV=4			1.0906e+06	1.48418e+07																		2	0	796.62	6.61222	1000	0.473684	0.731424
Q99832	T-complex protein 1 subunit eta OS=Homo sapiens OX=9606 GN=CCT7 PE=1 SV=2			3.60178e+06	1.80494e+07	35444.7							882376		23329.9				48469.2		1595		3	4	360.178	3.58996	1000	1	1.16236
P50990	T-complex protein 1 subunit theta OS=Homo sapiens OX=9606 GN=CCT8 PE=1 SV=4			5.04509e+06	2.60875e+07	28915.1		18549.2		17209													5	0	2.89151	3.58996	0.805443	0.0325077	0.12047
P40227	T-complex protein 1 subunit zeta OS=Homo sapiens OX=9606 GN=CCT6A PE=1 SV=3			3.10352e+06	1.76944e+07	19951.6							155304						2133.7				3	2	310.352	7.87188	39.4255	1	1.26506
P24821	Tenascin OS=Homo sapiens OX=9606 GN=TNC PE=1 SV=3	7.17936e+06	1.03025e+06	4.70771e+06	1.15837e+07	5.82217e+06	2.58461e+06	1.30496e+07	2.11394e+07	9.9728e+06	9.37652e+06	1.87746e+07	3.86281e+07	1.09736e+07	1.29444e+07	2.90392e+07	1.10947e+07	5.29105e+07	3.53344e+07	2.65393e+07	2.44273e+07		10	10	827.794	2160.09	0.383222			0.00105003	0.00392381
Q8NG11	Tetraspanin-14 OS=Homo sapiens OX=9606 GN=TSPAN14 PE=1 SV=1	48663.7	91797.2		209814				51410														4	0	7.16036	2548.33	0.001	0.0866873	0.260062
Q9Y320	Thioredoxin-related transmembrane protein 2 OS=Homo sapiens OX=9606 GN=TMX2 PE=1 SV=1										190352	2.49906e+06		6.18204e+06		1.39041e+06	1.90488e+06	1.04725e+06	1.49015e+06	4.92156e+06	2.24791e+06		1	8	19.0352	207.639	0.0916742	0.00547749	0.0401258	0.001444	0.0051262
P07996	Thrombospondin-1 OS=Homo sapiens OX=9606 GN=THBS1 PE=1 SV=2	1.72838e+07	6.18034e+06	1.90884e+07	1.03171e+08	4.1455e+07	3.42732e+07	8.87827e+07	1.22777e+08	8.74661e+07	1.609e+07	5.37357e+07	2.67969e+07	5.53987e+07	2.07101e+07	5.04958e+07	1.56135e+07	6.44402e+07	3.20439e+07	1.29527e+08	4.02515e+07		10	10	3786.41	1816.18	2.08482			0.911797	0.934839
P35443	Thrombospondin-4 OS=Homo sapiens OX=9606 GN=THBS4 PE=1 SV=2	545466			3.7783e+06	875818		2.08294e+06		462359			554902		213512			2.42466e+06	1.38208e+06	629054			5	5	87.5818	2679.69	0.0326836	1	1.32353
P02786	Transferrin receptor protein 1 OS=Homo sapiens OX=9606 GN=TFRC PE=1 SV=2	1.84589e+06	8.47837e+06		484703	1.58006e+06	663756	1.58892e+06	2.1685e+06	997890	1.07568e+06	4.08385e+06	1.04383e+07	6.28765e+06	3.57977e+06	5.2476e+06	1.40921e+06	4.54339e+06	4.3229e+06	4.54899e+06	7.47759e+06		9	10	158.006	408.385	0.386903	1	1.01286	0.00388621	0.0103148
Q15582	Transforming growth factor-beta-induced protein ig-h3 OS=Homo sapiens OX=9606 GN=TGFBI PE=1 SV=1		2.09854e+06		2.60044e+06		3.54645e+06	682524			1.13663e+06	596011		321549		722024	736964	566284	735814	798974	749805		5	8	209.854	249.449	0.841272	0.349845	0.715592	1	1
P61586	Transforming protein RhoA OS=Homo sapiens OX=9606 GN=RHOA PE=1 SV=1											147629		138806							363728		0	3	0.01	59.6011	0.001	0.210526	0.491228
P37802	Transgelin-2 OS=Homo sapiens OX=9606 GN=TAGLN2 PE=1 SV=3											548194		437741		224261		240196		393012	571682		0	6	0.01	36.3728	0.001	0.0108359	0.0598827	0.00597196	0.0147482
P29401	Transketolase OS=Homo sapiens OX=9606 GN=TKT PE=1 SV=3			4.08489e+06	3.67487e+07								639058		31516.8				82547.8				2	3	2041.68	39.3012	51.9495	1	1.26
P30408	Transmembrane 4 L6 family member 1 OS=Homo sapiens OX=9606 GN=TM4SF1 PE=1 SV=1								1.19416e+06				1.05201e+06		606465			524663	445150	1.77677e+06	208998		1	6	119.416	52.4663	2.27606	0.0572755	0.20502	0.0459638	0.0795959
Q9BVC6	Transmembrane protein 109 OS=Homo sapiens OX=9606 GN=TMEM109 PE=1 SV=1				184159															107076			1	1	18.4159	52.4663	0.351005	1	1.31799
Q66K66	Transmembrane protein 198 OS=Homo sapiens OX=9606 GN=TMEM198 PE=1 SV=1		690298								1.33628e+06	192017	329187	614957	903062	1.85122e+06	8.69939e+07	1.2046e+06	2.20784e+06	742206	389215	1	2	10	101.329	74.2206	1.36524	0.000714456	0.00978494	0.0026399	0.00742307
Q6UWD8	Transmembrane protein C16orf54 OS=Homo sapiens OX=9606 GN=C16orf54 PE=1 SV=1								1.05637e+08			197732	510625	36664.3	153752	112980	128108	436853	409393	477313	330154		1	10	10563.7	42.3123	1000	0.000119076	0.00375089	0.0017452	0.00569697
P02766	Transthyretin OS=Homo sapiens OX=9606 GN=TTR PE=1 SV=1	450170	12533.5		309182					1.07545e+06		2.5743e+06	7.51872e+06	3.6345e+06	2.9579e+06	4.43352e+06	1.39169e+06	1.62041e+06	6.43478e+06	3.55293e+06	5.8643e+06	1	4	10	37.9676	95.1159	0.399172	0.0108359	0.0588502	0.000149393	0.00103482
P67936	Tropomyosin alpha-4 chain OS=Homo sapiens OX=9606 GN=TPM4 PE=1 SV=3												428128		288739			250673		985382			0	4	0.01	276.61	0.001	0.0866873	0.257609
P07477	Trypsin-1 OS=Homo sapiens OX=9606 GN=PRSS1 PE=1 SV=1	1.54384e+07	3.13256e+07	3.98083e+07	650997	373116	218814	1.94508e+06		9.23121e+07	608819	2.12701e+07	1.4387e+06	3.32041e+07	1.22949e+06	2.77062e+07	1.71911e+07	1.12841e+06	2.15558e+06	1.73346e+06	1.92169e+07		10	10	194.508	158.608	1.22634			0.384673	0.468872
Q9BQE3	Tubulin alpha-1C chain OS=Homo sapiens OX=9606 GN=TUBA1C PE=1 SV=1		90692.1	2.58226e+07	1.29578e+08	129588	6.31927e+06	6788.81	1.05645e+06	29364.5	1.72449e+06	2.18251e+06	2.63114e+06	435218	4.8282e+07	774726	689420	1.3522e+06	1.53128e+06	2.11454e+06	2.09152e+06		4	5	105.645	210.303	0.502345	1	1.125
P68366	Tubulin alpha-4A chain OS=Homo sapiens OX=9606 GN=TUBA4A PE=1 SV=1			7.2205e+06	3.39791e+07	127154		415734			51576.8		928012		342520	217879		247911		499760	498543		5	6	41.5734	85.1369	0.488313	1	1.121	0.721363	0.803401
P07437	Tubulin beta chain OS=Homo sapiens OX=9606 GN=TUBB PE=1 SV=2			4.38601e+06	2.37196e+07								1.40396e+06		834470			1.19768e+06	1.49987e+06	2.0774e+06			2	5	1405.28	83.447	16.8404	0.349845	0.710976
Q9H4B7	Tubulin beta-1 chain OS=Homo sapiens OX=9606 GN=TUBB1 PE=1 SV=1	331826			4.82763e+06	398634			58190.5	41161.2		146487	390223	315074	996179	210803		925834	864749	2.29471e+06	741785		4	9	33.1826	89.5291	0.370635	0.0572755	0.202717	0.0463932	0.0793716
Q14166	Tubulin--tyrosine ligase-like protein 12 OS=Homo sapiens OX=9606 GN=TTLL12 PE=1 SV=2		2.5987e+07						1.78893e+07				2.74561e+06		8.38115e+06				4.55924e+06		217000		2	4	2193.82	86.4749	25.3694	0.628483	0.916538
Q9UMX0	Ubiquilin-1 OS=Homo sapiens OX=9606 GN=UBQLN1 PE=1 SV=2			1.0112e+06	5.96365e+06																		2	0	348.743	365.242	0.954826	0.473684	0.727856
P62987	Ubiquitin-60S ribosomal protein L40 OS=Homo sapiens OX=9606 GN=UBA52 PE=1 SV=2		884823		714042	880591				195279		1.1304e+06	3.36036e+06	3.156e+06	616362	1.02306e+06	583346	1.61563e+06	1.71211e+06	2.35541e+06	1.32321e+06		4	10	79.7316	146.942	0.542606	0.0108359	0.0578528	0.000860908	0.00349283
P68036	Ubiquitin-conjugating enzyme E2 L3 OS=Homo sapiens OX=9606 GN=UBE2L3 PE=1 SV=1			1.58475e+06	9.37286e+06								363263								5526.87		2	2	547.88	122.681	4.46591	1	1.3125
Q14376	UDP-glucose 4-epimerase OS=Homo sapiens OX=9606 GN=GALE PE=1 SV=2	2.66758e+06	735022	1.22252e+06	1.37421e+06	516381	3.22034e+06	1.39683e+06		967828	1.3994e+06	7.00553e+06	1.40492e+07	4.9557e+06	1.62664e+07	1.3173e+07	12428340	1.21358e+07	2.88604e+07	6.36474e+06	8.14062e+06		9	10	137.421	1013.82	0.135547	1	1.00962	1.08251e-05	0.000146396
Q5HYC2	Uncharacterized protein KIAA2026 OS=Homo sapiens OX=9606 GN=KIAA2026 PE=2 SV=2	2.83593e+06	985129	2.21074e+06	1.7809e+06	5.95845e+06		8.85061e+06	2.80431e+07	8.8359e+06	2.63383e+06	9.20889e+06	1.36044e+07	3.66075e+06	1.48014e+06	6.09585e+06	9411176	6.00032e+06	5.47049e+06	1.39026e+07	1.21493e+07		9	10	283.593	931.003	0.30461	1	1.00639	0.0892096	0.139206
P13611	Versican core protein OS=Homo sapiens OX=9606 GN=VCAN PE=1 SV=3				2.62386e+06		477307	297955	1.51279e+07		1.62455e+06		1.16237e+06	368213	400860			2.44439e+06	2.93482e+06	2.2889e+06			5	6	162.455	456.562	0.355822	1	1.11702	0.781485	0.840688
P08670	Vimentin OS=Homo sapiens OX=9606 GN=VIM PE=1 SV=4			1.67918e+06	8.42664e+06					119298					113204					552354			3	2	167.918	85.7362	1.95854	1	1.25498
P18206	Vinculin OS=Homo sapiens OX=9606 GN=VCL PE=1 SV=4	5.76891e+06	1.29685e+07	8.41835e+06	4.03388e+07	9.75155e+06	1.18056e+07	8.75533e+06	1.93806e+07	4.91464e+06	2.0391e+07	4.0269e+06	3.23121e+06	4.30067e+06	1.21464e+07	5.84021e+06	3.30852e+06	1.09717e+07	5.78396e+06	2.28615e+07	1.07394e+07		10	10	1077.86	504.231	2.13762			0.123005	0.18007
P02774	Vitamin D-binding protein OS=Homo sapiens OX=9606 GN=GC PE=1 SV=2				289457							1.08932e+06	3.33044e+06	866774	2.71063e+06	1.56287e+06	1.15699e+06	1.59683e+06	2.74228e+06	1.52357e+06	1.4914e+06	1	1	10	28.9457	326.987	0.0885225	0.000119076	0.0034099	8.74499e-05	0.000776118
P07225	Vitamin K-dependent protein S OS=Homo sapiens OX=9606 GN=PROS1 PE=1 SV=1	8.17657e+07	5.73096e+06	1.83527e+07	1.88283e+07	1.14705e+07	3.89428e+06	4.33061e+07	4.07232e+07	3.78033e+07	3.59408e+07	2.21042e+08	2.78769e+08	1.99326e+08	1.80343e+08	1.70301e+08	1.51816e+08	3.24465e+08	2.95626e+08	1.90081e+08	1.83266e+08	1	10	10	2738.45	7757.32	0.353016			1.08251e-05	0.000146396
P04004	Vitronectin OS=Homo sapiens OX=9606 GN=VTN PE=1 SV=1	4.17583e+07	2.1345e+07	6.57993e+07	9.75606e+07	5.21275e+07	1.20078e+07	7.15067e+07	1.21449e+08	2.14694e+07	7.41498e+07	3.94408e+07	8.68314e+07	6.9732e+07	7.32283e+07	2.6647e+07	2.68798e+07	4.72209e+07	4.65808e+07	6.31317e+07	8.25964e+07	1	10	10	5896.34	11932.4	0.494147			0.970512	0.980874
P45880	Voltage-dependent anion-selective channel protein 2 OS=Homo sapiens OX=9606 GN=VDAC2 PE=1 SV=2				5.13558e+06																		1	0	513.558	5517.63	0.0930759	1	1.00318
P04275	von Willebrand factor OS=Homo sapiens OX=9606 GN=VWF PE=1 SV=4	1.1649e+08	3.63166e+07	1.65615e+08	3.95161e+08	1.44034e+08	1.08327e+08	3.62495e+08	9.22267e+08	1.68787e+08	1.82451e+08	3.27162e+08	3.17786e+08	3.29997e+08	9.697e+07	1.94553e+08	6.01401e+08	5.12643e+08	2.39933e+08	4.72346e+08	7.13939e+08	1	10	10	16720.1	32858	0.50886			0.105122	0.159651
Q9Y2W2	WW domain-binding protein 11 OS=Homo sapiens OX=9606 GN=WBP11 PE=1 SV=1	2.43429e+06	527135	568555	1.3065e+07	3.67146e+06	1.08952e+06	2.94897e+06	391245	3.27649e+06	5.35422e+06	164294	3.11999e+06	203964	2.56188e+06		97945.9	4.31724e+06	4.96581e+06	6.96891e+06	9.38434e+06		10	9	269.163	9697	0.0277573	1	1	0.739364	0.807613
P13010	X-ray repair cross-complementing protein 5 OS=Homo sapiens OX=9606 GN=XRCC5 PE=1 SV=3			2.34463e+06	1.1041e+07	180069																	3	0	234.463	311.999	0.751485	0.210526	0.487616
Q9NSD4	Zinc finger protein 275 OS=Homo sapiens OX=9606 GN=ZNF275 PE=1 SV=2											202565		191669		302696					413721		0	4	0.01	25.263	0.001	0.0866873	0.255201

## Sheet: Table S2
Table S2. Functions associated with proteins upregulated in CD3(+) exosomes.
#category	term ID	term description	observed gene count	background gene count	strength	false discovery rate	matching proteins in your network
COMPARTMENTS	GOCC:0045111	Intermediate filament cytoskeleton	8	116	1.44	4.26e-07	KRT14,KRT9,KRT5,KRT1,KRT15,KRT24,KRT10,KRT2
COMPARTMENTS	GOCC:0005882	Intermediate filament	7	73	1.58	4.96e-07	KRT14,KRT9,KRT5,KRT1,KRT15,KRT10,KRT2
COMPARTMENTS	GOCC:0030057	Desmosome	3	23	1.72	0.0034	DSG1,DSP,JUP
COMPARTMENTS	GOCC:0001533	Cornified envelope	7	43	1.81	8.26e-08	KRT1,DSG1,KRT10,KRT2,HRNR,DSP,JUP
COMPARTMENTS	GOCC:0001931	Uropod	2	12	1.81	0.0332	MYH9,SELPLG
COMPARTMENTS	GOCC:0031254	Cell trailing edge	2	12	1.81	0.0332	MYH9,SELPLG
COMPARTMENTS	GOCC:0072562	Blood microparticle	4	116	1.14	0.0155	KRT1,LGALS3BP,HSPA8,PECAM1
COMPARTMENTS	GOCC:0009898	Cytoplasmic side of plasma membrane	4	112	1.14	0.014	MYH9,DSG1,GNAQ,TGM3
COMPARTMENTS	GOCC:0030667	Secretory granule membrane	7	252	1.5	0.0005	DSG1,CD53,ANPEP,PIGR,CD47,DSP,PECAM1
COMPARTMENTS	GOCC:0098562	Cytoplasmic side of membrane	4	136	1.7	0.0256	MYH9,DSG1,GNAQ,TGM3
COMPARTMENTS	GOCC:0070820	Tertiary granule	5	164	1.9	0.0052	DSG1,CD53,CAMP,CD47,DSP
COMPARTMENTS	GOCC:0043226	Organelle	36	9848	0.16	0.0448	KRT14,MYH9,GAPDH,KRT9,KRT5,KRT1,KRT15,DSG1,PSMA6,LGALS3BP,YWHAE,KRT24,KRT10,CD53,GNAQ,CAMP,ANXA5,ANPEP,ANTXR2,KRT2,PKD2L1,PIGR,ATP2A3,CD47,F11R,S100A9,HRNR,DSP,JUP,MMRN1,SPTLC3,SVEP1,PCYOX1,KANSL3,HSPA8,PECAM1
COMPARTMENTS	GOCC:0005737	Cytoplasm	36	7871	0.26	0.00043	KRT14,MYH9,GAPDH,KRT9,KRT5,KRT1,KRT15,DSG1,PSMA6,LGALS3BP,YWHAE,KRT24,KRT10,CD53,GNAQ,CAMP,ANXA5,ANPEP,PRDX2,SDPR,ANTXR2,KRT2,PIGR,ATP2A3,CD47,S100A9,HRNR,DSP,TGM3,JUP,MMRN1,LDHB,SVEP1,PCYOX1,HSPA8,PECAM1
COMPARTMENTS	GOCC:0016020	Membrane	27	5657	0.28	0.0087	MYH9,SELPLG,GAPDH,KRT1,DSG1,KRT10,CD53,GNAQ,ANXA5,ANPEP,SDPR,ANTXR2,KRT2,PKD2L1,PIGR,ATP2A3,CD47,F11R,S100A9,HRNR,DSP,TGM3,JUP,LDHB,SPTLC3,HSPA8,PECAM1
COMPARTMENTS	GOCC:0071944	Cell periphery	22	3688	0.38	0.0031	MYH9,SELPLG,GAPDH,KRT1,DSG1,KRT10,CD53,GNAQ,ANPEP,SDPR,KRT2,PKD2L1,PIGR,CD47,F11R,S100A9,HRNR,DSP,TGM3,JUP,HSPA8,PECAM1
COMPARTMENTS	GOCC:0012505	Endomembrane system	19	3080	0.39	0.0069	MYH9,GAPDH,KRT1,DSG1,LGALS3BP,CD53,CAMP,ANPEP,ANTXR2,PIGR,ATP2A3,CD47,HRNR,DSP,JUP,MMRN1,SPTLC3,HSPA8,PECAM1
COMPARTMENTS	GOCC:0005886	Plasma membrane	22	3531	0.4	0.0017	MYH9,SELPLG,GAPDH,KRT1,DSG1,KRT10,CD53,GNAQ,ANPEP,SDPR,KRT2,PKD2L1,PIGR,CD47,F11R,S100A9,HRNR,DSP,TGM3,JUP,HSPA8,PECAM1
COMPARTMENTS	GOCC:0098588	Bounding membrane of organelle	11	1416	0.49	0.0363	DSG1,CD53,ANPEP,ANTXR2,PKD2L1,PIGR,ATP2A3,CD47,DSP,HSPA8,PECAM1
COMPARTMENTS	GOCC:0031410	Cytoplasmic vesicle	16	1709	0.57	0.00043	MYH9,KRT1,DSG1,LGALS3BP,CD53,CAMP,ANPEP,ANTXR2,PIGR,CD47,HRNR,DSP,JUP,MMRN1,HSPA8,PECAM1
COMPARTMENTS	GOCC:0097708	Intracellular vesicle	16	1711	0.57	0.00043	MYH9,KRT1,DSG1,LGALS3BP,CD53,CAMP,ANPEP,ANTXR2,PIGR,CD47,HRNR,DSP,JUP,MMRN1,HSPA8,PECAM1
COMPARTMENTS	GOCC:0005576	Extracellular region	20	2035	0.59	1.07e-05	KRT14,GAPDH,KRT5,KRT1,LGALS3BP,CD53,GNAQ,MASP1,CAMP,ANXA5,ANPEP,PIGR,F11R,S100A9,EFEMP1,MMRN1,PCYOX1,DCD,HSPA8,PECAM1
COMPARTMENTS	GOCC:0031982	Vesicle	20	2051	0.59	1.07e-05	MYH9,GAPDH,KRT1,DSG1,LGALS3BP,CD53,GNAQ,CAMP,ANXA5,ANPEP,ANTXR2,PIGR,CD47,S100A9,HRNR,DSP,JUP,MMRN1,HSPA8,PECAM1
COMPARTMENTS	GOCC:0098805	Whole membrane	13	1219	0.63	0.00095	SELPLG,DSG1,CD53,GNAQ,ANPEP,SDPR,ANTXR2,PIGR,CD47,DSP,LDHB,HSPA8,PECAM1
COMPARTMENTS	GOCC:0099080	Supramolecular complex	9	769	0.67	0.0087	KRT14,MYH9,KRT9,KRT5,KRT1,KRT15,PSMA6,KRT10,KRT2
COMPARTMENTS	GOCC:0012506	Vesicle membrane	8	535	0.78	0.0047	DSG1,CD53,ANPEP,PIGR,CD47,DSP,HSPA8,PECAM1
COMPARTMENTS	GOCC:0030659	Cytoplasmic vesicle membrane	8	524	0.79	0.0042	DSG1,CD53,ANPEP,PIGR,CD47,DSP,HSPA8,PECAM1
COMPARTMENTS	GOCC:0005615	Extracellular space	16	985	0.81	4.96e-07	GAPDH,KRT5,KRT1,LGALS3BP,CD53,MASP1,CAMP,ANXA5,ANPEP,PIGR,S100A9,EFEMP1,PCYOX1,DCD,HSPA8,PECAM1
COMPARTMENTS	GOCC:0099512	Supramolecular fiber	8	490	0.81	0.0031	KRT14,MYH9,KRT9,KRT5,KRT1,KRT15,KRT10,KRT2
COMPARTMENTS	GOCC:0099081	Supramolecular polymer	8	498	0.81	0.0033	KRT14,MYH9,KRT9,KRT5,KRT1,KRT15,KRT10,KRT2
COMPARTMENTS	GOCC:0070161	Anchoring junction	9	540	0.82	0.00096	DSG1,YWHAE,CD53,ANXA5,F11R,DSP,JUP,HSPA8,PECAM1
COMPARTMENTS	GOCC:0099503	Secretory vesicle	15	785	0.88	4.19e-07	MYH9,KRT1,DSG1,LGALS3BP,CD53,CAMP,ANPEP,PIGR,CD47,HRNR,DSP,JUP,MMRN1,HSPA8,PECAM1
COMPARTMENTS	GOCC:0098552	Side of membrane	5	266	0.88	0.0332	MYH9,DSG1,GNAQ,TGM3,HSPA8
COMPARTMENTS	GOCC:0005911	Cell-cell junction	6	303	0.9	0.0087	DSG1,CD53,F11R,DSP,JUP,PECAM1
COMPARTMENTS	GOCC:1903561	Extracellular vesicle	9	444	0.91	0.0003	GAPDH,LGALS3BP,CD53,CAMP,ANXA5,ANPEP,S100A9,HSPA8,PECAM1
COMPARTMENTS	GOCC:0030141	Secretory granule	15	704	0.93	1.43e-07	MYH9,KRT1,DSG1,LGALS3BP,CD53,CAMP,ANPEP,PIGR,CD47,HRNR,DSP,JUP,MMRN1,HSPA8,PECAM1
COMPARTMENTS	GOCC:0099513	Polymeric cytoskeletal fiber	7	330	0.93	0.0022	KRT14,KRT9,KRT5,KRT1,KRT15,KRT10,KRT2
COMPARTMENTS	GOCC:0060205	Cytoplasmic vesicle lumen	5	235	0.93	0.0208	LGALS3BP,CAMP,HRNR,JUP,MMRN1
COMPARTMENTS	GOCC:0034774	Secretory granule lumen	5	230	0.94	0.0194	LGALS3BP,CAMP,HRNR,JUP,MMRN1
COMPARTMENTS	GOCC:0043230	Extracellular organelle	10	451	0.95	4.15e-05	GAPDH,LGALS3BP,CD53,CAMP,ANXA5,ANPEP,F11R,S100A9,HSPA8,PECAM1
COMPARTMENTS	GOCC:0070062	Extracellular exosome	9	368	0.99	7.12e-05	GAPDH,LGALS3BP,CD53,CAMP,ANXA5,ANPEP,S100A9,HSPA8,PECAM1
COMPARTMENTS	GOCC:0031983	Vesicle lumen	6	240	1	0.0033	LGALS3BP,CAMP,HRNR,JUP,MMRN1,HSPA8
COMPARTMENTS	GOCC:0042581	Specific granule	4	158	1	0.0391	CD53,CAMP,CD47,JUP
COMPARTMENTS	GOCC:0045095	Keratin filament	4	16	2	4.15e-05	KRT14,KRT5,KRT1,KRT2
DISEASES	DOID:9120	Amyloidosis	4	70	1.36	0.0063	KRT14,KRT5,KRT1,DCD
DISEASES	DOID:0111669	Hyaline fibromatosis syndrome	2	3	2.43	0.0095	KRT15,ANTXR2
DISEASES	DOID:161	Keratosis	7	58	1.68	2.12e-07	KRT14,KRT9,KRT5,KRT1,DSG1,DSP,JUP
DISEASES	DOID:3390	Palmoplantar keratosis	6	46	1.72	2.06e-06	KRT14,KRT9,KRT1,DSG1,DSP,JUP
DISEASES	DOID:2730	Epidermolysis bullosa	3	20	1.78	0.005	KRT14,KRT5,DSP
DISEASES	DOID:0060073	Lymphatic system cancer	4	105	1.18	0.0197	KRT14,KRT5,KRT1,PECAM1
DISEASES	DOID:0060084	Cell type benign neoplasm	6	152	1.2	0.00071	KRT14,KRT5,KRT1,KRT10,KRT2,PECAM1
DISEASES	DOID:6498	Seborrheic keratosis	3	6	2.3	0.00048	KRT14,KRT5,KRT1
DISEASES	DOID:8691	Mycosis fungoides	3	6	2.3	0.00048	KRT14,KRT5,KRT1
DISEASES	DOID:174	Acanthoma	5	8	2.4	1.46e-07	KRT14,KRT5,KRT1,KRT10,KRT2
DISEASES	DOID:0050639	Primary cutaneous amyloidosis	3	11	2.4	0.0013	KRT14,KRT5,KRT1
DISEASES	DOID:4603	Epidermolytic hyperkeratosis	4	4	2.6	1.74e-06	KRT9,KRT1,KRT10,KRT2
DISEASES	DOID:0060877	Bullous congenital ichthyosiform erythroderma	3	3	2.6	0.00016	KRT1,KRT10,KRT2
DISEASES	DOID:7039	Borst-Jadassohn intraepidermal carcinoma	3	3	2.6	0.00016	KRT14,KRT5,KRT1
DISEASES	DOID:0060735	Epidermolysis bullosa simplex dowling-meara type	2	2	2.6	0.0064	KRT14,KRT5
DISEASES	DOID:0080223	Epidermolytic palmoplantar keratoderma	2	2	2.6	0.0064	KRT9,KRT1
DISEASES	DOID:4323	Epidermolytic acanthoma	2	2	2.6	0.0064	KRT1,KRT2
DISEASES	DOID:37	Skin disease	14	481	1.7	4.65e-08	KRT14,KRT9,KRT5,KRT1,KRT15,DSG1,KRT10,GNAQ,CAMP,ANTXR2,KRT2,DSP,TGM3,JUP
DISEASES	DOID:0060072	Benign neoplasm	7	233	1.8	0.00061	KRT14,KRT5,KRT1,YWHAE,KRT10,KRT2,PECAM1
DISEASES	DOID:2513	Basal cell carcinoma	4	20	1.9	0.00016	KRT14,KRT5,KRT1,KRT15
DISEASES	DOID:14566	Disease of cellular proliferation	10	1012	0.6	0.0214	KRT14,GAPDH,KRT5,KRT1,KRT15,YWHAE,KRT10,GNAQ,KRT2,PECAM1
DISEASES	DOID:0050686	Organ system cancer	8	677	0.67	0.0302	KRT14,GAPDH,KRT5,KRT1,KRT15,YWHAE,GNAQ,PECAM1
DISEASES	DOID:0050687	Cell type cancer	7	406	0.84	0.0102	KRT14,GAPDH,KRT5,KRT1,KRT15,GNAQ,PECAM1
DISEASES	DOID:0060085	Organ system benign neoplasm	5	215	0.97	0.0249	KRT14,KRT5,KRT1,YWHAE,PECAM1
GO Component	GO:0005882	Intermediate filament	11	199	1.34	8.07e-10	KRT14,KRT32,KRT9,KRT5,KRT1,KRT15,KRT24,KRT10,KRT2,DSP,JUP
GO Component	GO:0030057	Desmosome	3	25	1.68	0.0031	DSG1,DSP,JUP
GO Component	GO:0001533	Cornified envelope	7	45	1.79	9e-09	KRT1,DSG1,KRT10,KRT2,HRNR,DSP,JUP
GO Component	GO:0001931	Uropod	2	13	1.79	0.0274	MYH9,SELPLG
GO Component	GO:0072562	Blood microparticle	4	115	1.14	0.0113	KRT1,LGALS3BP,ANXA5,HSPA8
GO Component	GO:0009898	Cytoplasmic side of plasma membrane	4	157	1.1	0.0281	DSG1,GNAQ,TGM3,JUP
GO Component	GO:0044291	Cell-cell contact zone	3	72	1.22	0.0329	DSP,JUP,PECAM1
GO Component	GO:0070820	Tertiary granule	5	164	1.9	0.0038	DSG1,CD53,CAMP,CD47,DSP
GO Component	GO:0005916	Fascia adherens	2	10	1.9	0.0178	DSP,JUP
GO Component	GO:0045095	Keratin filament	4	92	1.23	0.0056	KRT14,KRT5,KRT1,KRT2
GO Component	GO:0043227	Membrane-bounded organelle	45	12427	0.16	0.00057	KRT14,MYH9,KRT32,GAPDH,KRT9,KRT5,KRT1,KRT15,DSG1,PSMA6,LGALS3BP,YWHAE,KRT24,KRT10,CD53,GNAQ,MASP1,CAMP,ANXA5,ANPEP,PRDX2,SDPR,ANTXR2,KRT2,PKD2L1,PIGR,ATP2A3,CD47,F11R,S100A9,HRNR,DSP,TGM3,JUP,EFEMP1,MMRN1,LDHB,SPTLC3,SVEP1,PCYOX1,KANSL3,DCD,HSPA8,PECAM1,FCGBP
GO Component	GO:0005737	Cytoplasm	41	11428	0.16	0.0078	KRT14,MYH9,KRT32,GAPDH,KRT9,KRT5,KRT1,KRT15,DSG1,PSMA6,LGALS3BP,YWHAE,KRT24,KRT10,CD53,GNAQ,MASP1,CAMP,ANXA5,ANPEP,PRDX2,SDPR,ANTXR2,KRT2,PKD2L1,PIGR,ATP2A3,CD47,F11R,S100A9,HRNR,DSP,TGM3,JUP,MMRN1,LDHB,SPTLC3,SVEP1,PCYOX1,HSPA8,PECAM1
GO Component	GO:0016020	Membrane	34	9072	0.18	0.0357	MYH9,SELPLG,GAPDH,KRT9,KRT5,KRT1,DSG1,LGALS3BP,YWHAE,KRT10,CD53,GNAQ,ANXA5,ANPEP,SDPR,ANTXR2,KRT2,PKD2L1,C16orf54,PIGR,ATP2A3,CD47,F11R,S100A9,HRNR,DSP,TGM3,JUP,LDHB,SPTLC3,SVEP1,PCYOX1,HSPA8,PECAM1
GO Component	GO:0005886	Plasma membrane	26	5314	0.29	0.0064	MYH9,SELPLG,GAPDH,KRT5,KRT1,DSG1,KRT10,CD53,GNAQ,ANXA5,ANPEP,SDPR,ANTXR2,KRT2,PKD2L1,PIGR,CD47,F11R,S100A9,HRNR,DSP,TGM3,JUP,PCYOX1,HSPA8,PECAM1
GO Component	GO:0071944	Cell periphery	27	5432	0.3	0.0035	KRT14,MYH9,SELPLG,GAPDH,KRT5,KRT1,DSG1,KRT10,CD53,GNAQ,ANXA5,ANPEP,SDPR,ANTXR2,KRT2,PKD2L1,PIGR,CD47,F11R,S100A9,HRNR,DSP,TGM3,JUP,PCYOX1,HSPA8,PECAM1
GO Component	GO:0005856	Cytoskeleton	15	2221	0.43	0.0115	KRT14,MYH9,KRT32,GAPDH,KRT9,KRT5,KRT1,KRT15,YWHAE,KRT24,KRT10,KRT2,S100A9,DSP,JUP
GO Component	GO:0098805	Whole membrane	13	1715	0.48	0.0114	SELPLG,DSG1,CD53,GNAQ,ANPEP,SDPR,ANTXR2,PIGR,CD47,DSP,LDHB,HSPA8,PECAM1
GO Component	GO:0031410	Cytoplasmic vesicle	19	2386	0.5	0.00023	KRT1,DSG1,LGALS3BP,YWHAE,CD53,CAMP,ANPEP,ANTXR2,PKD2L1,PIGR,CD47,F11R,S100A9,HRNR,DSP,JUP,MMRN1,HSPA8,PECAM1
GO Component	GO:0005576	Extracellular region	39	4166	0.57	1.63e-15	KRT14,MYH9,KRT32,GAPDH,KRT9,KRT5,KRT1,KRT15,PSMA6,LGALS3BP,YWHAE,KRT24,KRT10,CD53,GNAQ,MASP1,CAMP,ANXA5,ANPEP,PRDX2,ANTXR2,KRT2,PIGR,CD47,F11R,S100A9,HRNR,DSP,TGM3,JUP,EFEMP1,MMRN1,LDHB,SVEP1,PCYOX1,DCD,HSPA8,PECAM1,FCGBP
GO Component	GO:0009986	Cell surface	8	824	0.59	0.0357	KRT10,CD53,ANXA5,ANPEP,ANTXR2,PKD2L1,CD47,PECAM1
GO Component	GO:0031982	Vesicle	39	3879	0.6	1.47e-16	KRT14,MYH9,KRT32,GAPDH,KRT9,KRT5,KRT1,KRT15,DSG1,PSMA6,LGALS3BP,YWHAE,KRT24,KRT10,CD53,GNAQ,CAMP,ANXA5,ANPEP,PRDX2,ANTXR2,KRT2,PKD2L1,PIGR,CD47,F11R,S100A9,HRNR,DSP,TGM3,JUP,EFEMP1,MMRN1,LDHB,PCYOX1,DCD,HSPA8,PECAM1,FCGBP
GO Component	GO:0030659	Cytoplasmic vesicle membrane	8	770	0.62	0.0274	DSG1,CD53,ANPEP,PIGR,CD47,DSP,HSPA8,PECAM1
GO Component	GO:0005615	Extracellular space	37	3195	0.67	4.38e-17	KRT14,MYH9,KRT32,GAPDH,KRT9,KRT5,KRT1,KRT15,PSMA6,LGALS3BP,YWHAE,KRT24,KRT10,CD53,GNAQ,MASP1,CAMP,ANXA5,ANPEP,PRDX2,KRT2,PIGR,CD47,F11R,S100A9,HRNR,DSP,TGM3,JUP,EFEMP1,LDHB,SVEP1,PCYOX1,DCD,HSPA8,PECAM1,FCGBP
GO Component	GO:0070161	Anchoring junction	10	820	0.69	0.0023	MYH9,DSG1,YWHAE,CD53,ANXA5,F11R,DSP,JUP,HSPA8,PECAM1
GO Component	GO:0005911	Cell-cell junction	7	490	0.76	0.0113	MYH9,DSG1,CD53,F11R,DSP,JUP,PECAM1
GO Component	GO:0099512	Supramolecular fiber	14	939	0.77	7.22e-06	KRT14,MYH9,KRT32,KRT9,KRT5,KRT1,KRT15,PSMA6,KRT24,KRT10,KRT2,DSP,JUP,PECAM1
GO Component	GO:0070062	Extracellular exosome	35	2099	0.82	3.66e-20	KRT14,MYH9,KRT32,GAPDH,KRT9,KRT5,KRT1,KRT15,PSMA6,LGALS3BP,YWHAE,KRT24,KRT10,CD53,GNAQ,CAMP,ANXA5,ANPEP,PRDX2,KRT2,PIGR,CD47,F11R,S100A9,HRNR,DSP,TGM3,JUP,EFEMP1,LDHB,PCYOX1,DCD,HSPA8,PECAM1,FCGBP
GO Component	GO:0098552	Side of membrane	9	531	0.83	0.00059	DSG1,GNAQ,ANXA5,ANPEP,ANTXR2,TGM3,JUP,HSPA8,PECAM1
GO Component	GO:0030141	Secretory granule	15	845	0.85	2.5e-07	KRT1,DSG1,LGALS3BP,CD53,CAMP,ANPEP,PIGR,CD47,S100A9,HRNR,DSP,JUP,MMRN1,HSPA8,PECAM1
GO Component	GO:0062023	Collagen-containing extracellular matrix	7	396	0.85	0.0038	KRT1,LGALS3BP,ANXA5,S100A9,HRNR,EFEMP1,MMRN1
GO Component	GO:0034774	Secretory granule lumen	7	324	0.94	0.0014	LGALS3BP,CAMP,S100A9,HRNR,JUP,MMRN1,HSPA8
GO Component	GO:0030667	Secretory granule membrane	7	300	0.97	0.00089	DSG1,CD53,ANPEP,PIGR,CD47,DSP,PECAM1
GO Component	GO:0042581	Specific granule	4	159	1	0.0288	CD53,CAMP,CD47,JUP
GO Function	GO:0005200	Structural constituent of cytoskeleton	6	104	1.36	0.0005	KRT14,KRT9,KRT5,KRT15,KRT2,DSP
GO Function	GO:0097110	Scaffold protein binding	4	58	1.44	0.0093	KRT5,KRT15,YWHAE,DSP
GO Function	GO:0030280	Structural constituent of skin epidermis	3	14	1.92	0.0087	KRT1,KRT10,KRT2
GO Function	GO:0086080	Protein binding involved in heterotypic cell-cell adhesion	3	13	1.96	0.0087	CD47,DSP,JUP
GO Function	GO:0005509	Calcium ion binding	10	703	0.75	0.0087	DSG1,MASP1,ANXA5,PKD2L1,S100A9,HRNR,TGM3,EFEMP1,MMRN1,SVEP1
GO Function	GO:0005198	Structural molecule activity	13	635	0.91	1.41e-05	KRT14,KRT32,KRT9,KRT5,KRT1,KRT15,KRT24,KRT10,KRT2,DSP,TGM3,JUP,MMRN1
GO Process	GO:0031424	Keratinization	14	226	1.39	3.42e-12	KRT14,KRT32,KRT9,KRT5,KRT1,KRT15,DSG1,KRT24,KRT10,KRT2,HRNR,DSP,TGM3,JUP
GO Process	GO:0043163	Cell envelope organization	2	3	2.43	0.0145	HRNR,TGM3
GO Process	GO:0050832	Defense response to fungus	4	48	1.52	0.0025	GAPDH,CAMP,S100A9,DCD
GO Process	GO:0007159	Leukocyte cell-cell adhesion	5	56	1.55	0.00016	SELPLG,CD47,F11R,S100A9,PECAM1
GO Process	GO:0045123	Cellular extravasation	4	42	1.58	0.0016	SELPLG,CD47,F11R,PECAM1
GO Process	GO:0070268	Cornification	12	113	1.63	2.54e-12	KRT14,KRT32,KRT9,KRT5,KRT1,KRT15,DSG1,KRT24,KRT10,KRT2,DSP,JUP
GO Process	GO:0051873	Killing by host of symbiont cells	3	27	1.65	0.0138	GAPDH,CAMP,DCD
GO Process	GO:0018149	Peptide cross-linking	5	34	1.77	1.82e-05	KRT1,KRT10,KRT2,DSP,TGM3
GO Process	GO:0045109	Intermediate filament organization	4	25	1.81	0.00028	KRT14,KRT9,KRT2,DSP
GO Process	GO:0035821	Modulation of process of other organism	4	115	1.14	0.0384	GAPDH,CAMP,S100A9,HSPA8
GO Process	GO:0061844	Antimicrobial humoral immune response mediated by antimicrobial peptide	4	113	1.14	0.037	GAPDH,CAMP,S100A9,DCD
GO Process	GO:0008544	Epidermis development	15	419	1.16	2.39e-10	KRT14,KRT32,KRT9,KRT5,KRT1,KRT15,DSG1,KRT24,KRT10,KRT2,HRNR,DSP,TGM3,JUP,SVEP1
GO Process	GO:0035696	Monocyte extravasation	2	5	2.2	0.0256	CD47,PECAM1
GO Process	GO:0043312	Neutrophil degranulation	13	484	1.3	1.86e-07	KRT1,DSG1,CD53,CAMP,ANPEP,PIGR,CD47,S100A9,HRNR,DSP,JUP,HSPA8,PECAM1
GO Process	GO:0045216	Cell-cell junction organization	5	180	1.5	0.0203	DSG1,F11R,DSP,JUP,PECAM1
GO Process	GO:0086091	Regulation of heart rate by cardiac conduction	3	38	1.5	0.0282	YWHAE,DSP,JUP
GO Process	GO:0035606	Peptidyl-cysteine s-trans-nitrosylation	2	2	2.6	0.0094	GAPDH,S100A9
GO Process	GO:0086073	Bundle of his cell-purkinje myocyte adhesion involved in cell communication	2	6	2.12	0.0316	DSP,JUP
GO Process	GO:0051702	Interaction with symbiont	4	93	1.23	0.0208	GAPDH,CAMP,DCD,HSPA8
GO Process	GO:0050818	Regulation of coagulation	4	84	1.27	0.0157	KRT1,ANXA5,PRDX2,F11R
GO Process	GO:0051179	Localization	27	5591	0.29	0.0195	MYH9,SELPLG,KRT1,DSG1,PSMA6,LGALS3BP,YWHAE,CD53,MASP1,CAMP,ANXA5,ANPEP,ANTXR2,KRT2,PKD2L1,PIGR,ATP2A3,CD47,F11R,S100A9,HRNR,DSP,JUP,MMRN1,PCYOX1,HSPA8,PECAM1
GO Process	GO:0048731	System development	23	4426	0.32	0.0295	KRT14,MYH9,KRT32,SELPLG,KRT9,KRT5,KRT1,KRT15,DSG1,YWHAE,KRT24,KRT10,ANPEP,PRDX2,KRT2,S100A9,HRNR,DSP,TGM3,JUP,EFEMP1,SVEP1,PECAM1
GO Process	GO:0006810	Transport	25	4353	0.36	0.0028	MYH9,KRT1,DSG1,PSMA6,LGALS3BP,YWHAE,CD53,MASP1,CAMP,ANXA5,ANPEP,ANTXR2,PKD2L1,PIGR,ATP2A3,CD47,F11R,S100A9,HRNR,DSP,JUP,MMRN1,PCYOX1,HSPA8,PECAM1
GO Process	GO:0006950	Response to stress	20	3485	0.36	0.0282	MYH9,GAPDH,KRT1,PSMA6,LGALS3BP,YWHAE,GNAQ,MASP1,CAMP,ANXA5,PRDX2,ATP2A3,CD47,F11R,S100A9,DSP,MMRN1,DCD,HSPA8,PECAM1
GO Process	GO:0048513	Animal organ development	20	3197	0.4	0.0102	KRT14,MYH9,KRT32,SELPLG,KRT9,KRT5,KRT1,KRT15,DSG1,YWHAE,KRT24,KRT10,PRDX2,KRT2,HRNR,DSP,TGM3,JUP,EFEMP1,PECAM1
GO Process	GO:0051641	Cellular localization	20	2967	0.43	0.0037	MYH9,KRT1,DSG1,LGALS3BP,YWHAE,CD53,CAMP,ANXA5,ANPEP,PIGR,ATP2A3,CD47,F11R,S100A9,HRNR,DSP,JUP,MMRN1,HSPA8,PECAM1
GO Process	GO:0051649	Establishment of localization in cell	19	2375	0.5	0.00068	MYH9,KRT1,DSG1,LGALS3BP,YWHAE,CD53,CAMP,ANXA5,ANPEP,PIGR,ATP2A3,CD47,S100A9,HRNR,DSP,JUP,MMRN1,HSPA8,PECAM1
GO Process	GO:0002376	Immune system process	21	2481	0.53	6.65e-05	MYH9,SELPLG,GAPDH,KRT1,DSG1,PSMA6,CD53,MASP1,CAMP,ANPEP,PRDX2,PIGR,CD47,F11R,S100A9,HRNR,DSP,JUP,DCD,HSPA8,PECAM1
GO Process	GO:0009888	Tissue development	17	1760	0.59	0.00025	KRT14,KRT32,KRT9,KRT5,KRT1,KRT15,DSG1,KRT24,KRT10,KRT2,F11R,HRNR,DSP,TGM3,JUP,SVEP1,PECAM1
GO Process	GO:0016192	Vesicle-mediated transport	18	1805	0.6	6.65e-05	MYH9,KRT1,DSG1,LGALS3BP,CD53,MASP1,CAMP,ANXA5,ANPEP,PIGR,CD47,S100A9,HRNR,DSP,JUP,MMRN1,HSPA8,PECAM1
GO Process	GO:0006955	Immune response	16	1588	0.6	0.00032	GAPDH,KRT1,DSG1,CD53,MASP1,CAMP,ANPEP,PIGR,CD47,S100A9,HRNR,DSP,JUP,DCD,HSPA8,PECAM1
GO Process	GO:0007155	Cell adhesion	12	925	0.71	0.00078	MYH9,SELPLG,DSG1,LGALS3BP,CD47,F11R,S100A9,DSP,JUP,MMRN1,SVEP1,PECAM1
GO Process	GO:0012501	Programmed cell death	15	1054	0.75	1.22e-05	KRT14,KRT32,GAPDH,KRT9,KRT5,KRT1,KRT15,DSG1,KRT24,KRT10,KRT2,ATP2A3,S100A9,DSP,JUP
GO Process	GO:0034330	Cell junction organization	7	493	0.75	0.0391	KRT14,KRT5,DSG1,F11R,DSP,JUP,PECAM1
GO Process	GO:0002252	Immune effector process	15	969	0.79	4.19e-06	KRT1,DSG1,CD53,MASP1,CAMP,ANPEP,PRDX2,PIGR,CD47,S100A9,HRNR,DSP,JUP,HSPA8,PECAM1
GO Process	GO:0050878	Regulation of body fluid levels	8	509	0.8	0.0097	MYH9,KRT1,GNAQ,ANXA5,PRDX2,F11R,HRNR,MMRN1
GO Process	GO:0001775	Cell activation	18	1075	0.83	6.69e-08	MYH9,SELPLG,KRT1,DSG1,CD53,GNAQ,CAMP,ANPEP,PRDX2,KRT2,PIGR,CD47,S100A9,HRNR,DSP,JUP,HSPA8,PECAM1
GO Process	GO:0045321	Leukocyte activation	16	929	0.84	3.4e-07	MYH9,SELPLG,KRT1,DSG1,CD53,CAMP,ANPEP,PRDX2,PIGR,CD47,S100A9,HRNR,DSP,JUP,HSPA8,PECAM1
GO Process	GO:0098609	Cell-cell adhesion	9	505	0.85	0.0014	MYH9,SELPLG,DSG1,CD47,F11R,S100A9,DSP,JUP,PECAM1
GO Process	GO:0050900	Leukocyte migration	6	316	0.88	0.0282	MYH9,SELPLG,CD47,F11R,S100A9,PECAM1
GO Process	GO:0034329	Cell junction assembly	6	280	0.93	0.0164	KRT14,KRT5,DSG1,F11R,JUP,PECAM1
GO Process	GO:0006959	Humoral immune response	6	275	0.94	0.0157	GAPDH,KRT1,MASP1,CAMP,S100A9,DCD
GO Process	GO:0030855	Epithelial cell differentiation	16	673	0.98	7.34e-09	KRT14,KRT32,KRT9,KRT5,KRT1,KRT15,DSG1,KRT24,KRT10,KRT2,F11R,HRNR,DSP,TGM3,JUP,PECAM1
GO Process	GO:0045055	Regulated exocytosis	17	697	0.99	1.15e-09	MYH9,KRT1,DSG1,LGALS3BP,CD53,CAMP,ANXA5,ANPEP,PIGR,CD47,S100A9,HRNR,DSP,JUP,MMRN1,HSPA8,PECAM1
InterPro	IPR039008	Intermediate filament, rod domain	9	73	1.69	1.51e-09	KRT14,KRT32,KRT9,KRT5,KRT1,KRT15,KRT24,KRT10,KRT2
InterPro	IPR018039	Intermediate filament protein, conserved site	9	62	1.76	7.82e-10	KRT14,KRT32,KRT9,KRT5,KRT1,KRT15,KRT24,KRT10,KRT2
InterPro	IPR002957	Keratin, type I	6	32	1.87	1.04e-06	KRT14,KRT32,KRT9,KRT15,KRT24,KRT10
KEGG	hsa04915	Estrogen signaling pathway	8	133	1.38	3.45e-07	KRT14,KRT32,KRT9,KRT15,KRT24,KRT10,GNAQ,HSPA8
KEGG	hsa05150	Staphylococcus aureus infection	9	86	1.62	5.86e-10	KRT14,KRT32,SELPLG,KRT9,KRT15,DSG1,KRT24,KRT10,CAMP
Pfam	PF00038	Intermediate filament protein	9	72	1.7	1.37e-09	KRT14,KRT32,KRT9,KRT5,KRT1,KRT15,KRT24,KRT10,KRT2
Reactome	HSA-6809371	Formation of the cornified envelope	12	127	1.58	1.58e-12	KRT14,KRT32,KRT9,KRT5,KRT1,KRT15,DSG1,KRT24,KRT10,KRT2,DSP,JUP
Reactome	HSA-1500931	Cell-Cell communication	5	130	1.18	0.0058	KRT14,KRT5,CD47,F11R,JUP
Reactome	HSA-6798695	Neutrophil degranulation	13	473	1.4	9.53e-08	KRT1,DSG1,CD53,CAMP,ANPEP,PIGR,CD47,S100A9,HRNR,DSP,JUP,HSPA8,PECAM1
Reactome	HSA-446728	Cell junction organization	4	92	1.23	0.0233	KRT14,KRT5,F11R,JUP
Reactome	HSA-1266738	Developmental Biology	15	1087	0.74	1.79e-05	KRT14,MYH9,KRT32,KRT9,KRT5,KRT1,KRT15,DSG1,PSMA6,KRT24,KRT10,KRT2,DSP,JUP,HSPA8
Reactome	HSA-109582	Hemostasis	9	605	0.77	0.0057	SELPLG,LGALS3BP,GNAQ,ANXA5,ATP2A3,CD47,F11R,MMRN1,PECAM1
Reactome	HSA-168249	Innate Immune System	16	1025	0.79	1.22e-06	MYH9,KRT1,DSG1,PSMA6,CD53,CAMP,ANPEP,PIGR,CD47,S100A9,HRNR,DSP,JUP,DCD,HSPA8,PECAM1
SMART	SM01391	Intermediate filament protein	9	67	1.73	1.59e-10	KRT14,KRT32,KRT9,KRT5,KRT1,KRT15,KRT24,KRT10,KRT2
STRING clusters	CL:35932	Keratin	9	135	1.43	9.69e-08	KRT14,KRT32,KRT9,KRT5,KRT1,KRT15,KRT24,KRT10,KRT2
STRING clusters	CL:36141	Keratin type II head	3	14	1.92	0.0063	KRT1,KRT10,KRT2
STRING clusters	CL:36139	Keratin type II head, and Keratin, type I	7	27	2.2	9.01e-09	KRT14,KRT32,KRT5,KRT1,KRT15,KRT10,KRT2
STRING clusters	CL:36140	Keratin type II head, and Large cell acanthoma	6	22	2.4	9.69e-08	KRT14,KRT5,KRT1,KRT15,KRT10,KRT2
TISSUES	BTO:0000091	Ascites	3	58	1.31	0.0142	GAPDH,LGALS3BP,HSPA8
TISSUES	BTO:0004680	Stratum basale	3	5	1.38	7.04e-05	KRT14,KRT5,KRT10
TISSUES	BTO:0000939	Basal cell	2	3	2.43	0.0028	KRT14,KRT5
TISSUES	BTO:0003969	Hair follicle outer root sheath	2	3	2.43	0.0028	KRT14,KRT15
TISSUES	BTO:0001202	Saliva	4	57	1.45	0.001	DSG1,LGALS3BP,PIGR,FCGBP
TISSUES	BTO:0001499	Tear	2	24	1.52	0.0428	PIGR,DCD
TISSUES	BTO:0001208	Larynx	3	32	1.57	0.0039	KRT14,GAPDH,KRT5
TISSUES	BTO:0003914	Interstitial cell of cajal	2	15	1.73	0.0219	GAPDH,PRDX2
TISSUES	BTO:0000121	Bile	4	19	1.92	2.94e-05	LGALS3BP,ANPEP,PIGR,FCGBP
TISSUES	BTO:0000167	Adenocarcinoma cell line	3	83	1.16	0.0316	GAPDH,ANXA5,CD47
TISSUES	BTO:0001470	Epidermal cell	7	185	1.18	4.46e-05	KRT14,KRT5,KRT15,DSG1,KRT10,PRDX2,S100A9
TISSUES	BTO:0000667	Keratinocyte	4	99	1.21	0.0051	DSG1,KRT10,PRDX2,S100A9
TISSUES	BTO:0000903	Atrium	3	74	1.21	0.0246	GAPDH,LDHB,HSPA8
TISSUES	BTO:0001629	Left ventricle	3	74	1.21	0.0246	GAPDH,LDHB,HSPA8
TISSUES	BTO:0000132	Blood platelet	9	337	1.3	1.74e-05	MYH9,GAPDH,KRT1,YWHAE,SDPR,ATP2A3,F11R,MMRN1,PECAM1
TISSUES	BTO:0002309	Myoepithelial cell	2	4	2.3	0.0039	KRT14,KRT5
TISSUES	BTO:0000849	Melanoma cell line	4	145	1.4	0.0152	YWHAE,ANXA5,DCD,HSPA8
TISSUES	BTO:0002860	Oral mucosa	3	11	2.4	0.00038	KRT5,KRT1,S100A9
TISSUES	BTO:0001113	Prepuce	4	51	1.5	0.00075	DSG1,KRT10,DSP,TGM3
TISSUES	BTO:0002074	Stratified epithelium	2	2	2.6	0.002	KRT14,KRT10
TISSUES	BTO:0002922	Bronchial epithelial cell	2	7	2.6	0.0077	KRT14,KRT5
TISSUES	BTO:0000392	Plasma cell	4	137	1.7	0.013	LGALS3BP,ANPEP,PIGR,FCGBP
TISSUES	BTO:0001120	Epithelial cell line	4	129	1.9	0.0109	GAPDH,ANXA5,CD47,PECAM1
TISSUES	BTO:0000404	Epidermis	9	277	1.11	5.14e-06	KRT14,KRT32,KRT5,KRT15,DSG1,KRT10,PRDX2,KRT2,S100A9
TISSUES	BTO:0001049	Pharynx	3	68	1.25	0.0205	KRT14,KRT5,HSPA8
TISSUES	BTO:0004238	Interstitial cell	3	64	1.27	0.0176	GAPDH,PRDX2,HSPA8
TISSUES	BTO:0001158	Rectum	3	62	1.29	0.0163	MYH9,DSP,FCGBP
TISSUES	BTO:0001489	Whole body	46	12619	0.16	0.00013	KRT14,MYH9,KRT32,SELPLG,GAPDH,KRT9,KRT5,KRT1,KRT15,DSG1,PSMA6,LGALS3BP,YWHAE,KRT24,KRT10,CD53,GNAQ,MASP1,CAMP,ANXA5,ANPEP,PRDX2,SDPR,ANTXR2,KRT2,PKD2L1,PIGR,ATP2A3,CD47,F11R,S100A9,HRNR,DSP,TGM3,JUP,EFEMP1,MMRN1,LDHB,SPTLC3,SVEP1,PCYOX1,KANSL3,DCD,HSPA8,PECAM1,FCGBP
TISSUES	BTO:0003091	Urogenital system	30	6716	0.25	0.0046	KRT14,MYH9,SELPLG,GAPDH,KRT5,DSG1,PSMA6,LGALS3BP,YWHAE,KRT10,GNAQ,MASP1,CAMP,ANXA5,PRDX2,ANTXR2,ATP2A3,CD47,F11R,S100A9,DSP,TGM3,JUP,EFEMP1,LDHB,SPTLC3,SVEP1,PCYOX1,KANSL3,HSPA8
TISSUES	BTO:0000522	Gland	31	6602	0.27	0.0014	KRT14,MYH9,GAPDH,KRT5,KRT15,PSMA6,LGALS3BP,YWHAE,KRT10,GNAQ,MASP1,CAMP,ANXA5,ANPEP,PRDX2,ANTXR2,PIGR,ATP2A3,CD47,F11R,S100A9,HRNR,DSP,JUP,EFEMP1,LDHB,PCYOX1,KANSL3,DCD,HSPA8,PECAM1
TISSUES	BTO:0000083	Female reproductive system	27	5799	0.27	0.0067	KRT14,MYH9,GAPDH,KRT5,PSMA6,LGALS3BP,YWHAE,KRT10,GNAQ,MASP1,CAMP,ANXA5,PRDX2,ANTXR2,ATP2A3,CD47,F11R,S100A9,DSP,JUP,EFEMP1,LDHB,SPTLC3,SVEP1,PCYOX1,KANSL3,HSPA8
TISSUES	BTO:0001488	Endocrine gland	29	6036	0.28	0.0021	KRT14,MYH9,GAPDH,KRT5,KRT15,PSMA6,LGALS3BP,YWHAE,KRT10,GNAQ,MASP1,CAMP,ANXA5,ANPEP,PRDX2,ANTXR2,PIGR,ATP2A3,CD47,F11R,S100A9,DSP,JUP,EFEMP1,LDHB,PCYOX1,KANSL3,HSPA8,PECAM1
TISSUES	BTO:0000081	Reproductive system	29	6107	0.28	0.0024	KRT14,MYH9,GAPDH,KRT5,DSG1,PSMA6,LGALS3BP,YWHAE,KRT10,GNAQ,MASP1,CAMP,ANXA5,PRDX2,ANTXR2,ATP2A3,CD47,F11R,S100A9,DSP,TGM3,JUP,EFEMP1,LDHB,SPTLC3,SVEP1,PCYOX1,KANSL3,HSPA8
TISSUES	BTO:0000082	Male reproductive system	15	2671	0.35	0.0389	GAPDH,KRT5,DSG1,PSMA6,LGALS3BP,YWHAE,KRT10,GNAQ,CAMP,ANXA5,DSP,TGM3,LDHB,KANSL3,HSPA8
TISSUES	BTO:0001491	Viscus	32	5020	0.41	1.16e-06	KRT14,MYH9,GAPDH,KRT5,KRT1,KRT15,PSMA6,LGALS3BP,YWHAE,KRT24,KRT10,CD53,GNAQ,MASP1,ANXA5,ANPEP,PRDX2,PIGR,ATP2A3,CD47,F11R,S100A9,DSP,JUP,EFEMP1,LDHB,SPTLC3,PCYOX1,KANSL3,HSPA8,PECAM1,FCGBP
TISSUES	BTO:0000284	Organism form	17	2239	0.48	0.0011	MYH9,GAPDH,PSMA6,LGALS3BP,YWHAE,GNAQ,CAMP,ANXA5,ANTXR2,JUP,LDHB,SPTLC3,SVEP1,PCYOX1,KANSL3,HSPA8,FCGBP
TISSUES	BTO:0000174	Embryonic structure	16	2132	0.48	0.0021	MYH9,GAPDH,PSMA6,LGALS3BP,YWHAE,GNAQ,ANXA5,ANTXR2,JUP,LDHB,SPTLC3,SVEP1,PCYOX1,KANSL3,HSPA8,FCGBP
TISSUES	BTO:0000648	Intestine	10	1249	0.5	0.0246	MYH9,GAPDH,LGALS3BP,KRT24,ANPEP,PIGR,DSP,KANSL3,HSPA8,FCGBP
TISSUES	BTO:0000511	Gastrointestinal tract	14	1680	0.52	0.0022	MYH9,GAPDH,LGALS3BP,YWHAE,KRT24,ANXA5,ANPEP,PRDX2,PIGR,DSP,LDHB,KANSL3,HSPA8,FCGBP
TISSUES	BTO:0003099	Internal female genital organ	22	2593	0.53	9.06e-06	KRT14,MYH9,GAPDH,KRT5,LGALS3BP,YWHAE,KRT10,GNAQ,MASP1,ANXA5,ANTXR2,ATP2A3,CD47,F11R,S100A9,JUP,LDHB,SPTLC3,SVEP1,PCYOX1,KANSL3,HSPA8
TISSUES	BTO:0000088	Cardiovascular system	9	1005	0.55	0.0219	GAPDH,YWHAE,ANTXR2,EFEMP1,MMRN1,LDHB,PCYOX1,HSPA8,PECAM1
TISSUES	BTO:0000345	Digestive gland	24	2645	0.56	5.61e-07	KRT14,MYH9,GAPDH,KRT5,KRT15,PSMA6,LGALS3BP,YWHAE,KRT10,GNAQ,MASP1,ANXA5,ANPEP,PRDX2,PIGR,CD47,F11R,S100A9,DSP,JUP,LDHB,PCYOX1,HSPA8,PECAM1
TISSUES	BTO:0000058	Alimentary canal	17	1865	0.56	0.00012	KRT14,MYH9,GAPDH,KRT5,LGALS3BP,YWHAE,KRT24,ANXA5,ANPEP,PRDX2,PIGR,F11R,DSP,LDHB,KANSL3,HSPA8,FCGBP
TISSUES	BTO:0000580	Blood cancer cell	10	1098	0.56	0.011	MYH9,SELPLG,GAPDH,PSMA6,YWHAE,CD47,LDHB,PCYOX1,HSPA8,PECAM1
TISSUES	BTO:0000562	Heart	7	695	0.6	0.0389	GAPDH,YWHAE,MMRN1,LDHB,PCYOX1,HSPA8,PECAM1
TISSUES	BTO:0001078	Placenta	12	1176	0.61	0.0015	MYH9,GAPDH,LGALS3BP,YWHAE,ANXA5,ANTXR2,JUP,LDHB,SPTLC3,SVEP1,PCYOX1,HSPA8
TISSUES	BTO:0000421	Connective tissue	9	871	0.62	0.0096	GAPDH,LGALS3BP,YWHAE,ANXA5,PRDX2,ANTXR2,EFEMP1,LDHB,HSPA8
TISSUES	BTO:0000570	Hematopoietic system	27	2543	0.63	1.64e-09	KRT14,MYH9,SELPLG,GAPDH,KRT9,KRT5,KRT1,PSMA6,LGALS3BP,YWHAE,KRT10,CD53,GNAQ,ANPEP,PRDX2,SDPR,ANTXR2,KRT2,ATP2A3,CD47,F11R,S100A9,JUP,MMRN1,LDHB,HSPA8,PECAM1
TISSUES	BTO:0000759	Liver	21	1882	0.65	2.7e-07	MYH9,GAPDH,KRT5,PSMA6,LGALS3BP,YWHAE,KRT10,GNAQ,MASP1,ANXA5,ANPEP,PRDX2,PIGR,CD47,F11R,S100A9,DSP,LDHB,PCYOX1,HSPA8,PECAM1
TISSUES	BTO:0000753	Lymphoid tissue	17	1496	0.66	9.06e-06	KRT14,MYH9,GAPDH,KRT9,KRT5,KRT1,YWHAE,KRT10,CD53,PRDX2,SDPR,ANTXR2,KRT2,CD47,S100A9,LDHB,HSPA8
TISSUES	BTO:0000203	Respiratory system	17	1436	0.67	5.39e-06	KRT14,MYH9,GAPDH,KRT5,LGALS3BP,YWHAE,ANXA5,PRDX2,F11R,S100A9,DSP,JUP,EFEMP1,LDHB,PCYOX1,HSPA8,PECAM1
TISSUES	BTO:0000988	Pancreas	7	568	0.69	0.0153	KRT14,GAPDH,KRT5,KRT15,ANPEP,DSP,HSPA8
TISSUES	BTO:0000763	Lung	15	1162	0.71	1.17e-05	KRT14,MYH9,GAPDH,KRT5,LGALS3BP,YWHAE,ANXA5,PRDX2,S100A9,DSP,JUP,EFEMP1,LDHB,HSPA8,PECAM1
TISSUES	BTO:0000634	Integument	27	1970	0.74	1.39e-11	KRT14,KRT32,GAPDH,KRT5,KRT1,KRT15,DSG1,PSMA6,LGALS3BP,KRT24,KRT10,GNAQ,ANXA5,ANPEP,PRDX2,ANTXR2,KRT2,S100A9,HRNR,DSP,EFEMP1,MMRN1,LDHB,DCD,HSPA8,PECAM1,FCGBP
TISSUES	BTO:0000089	Blood	23	1675	0.74	1.27e-09	KRT14,MYH9,SELPLG,GAPDH,KRT9,KRT5,KRT1,YWHAE,KRT10,GNAQ,ANPEP,PRDX2,SDPR,KRT2,ATP2A3,CD47,F11R,S100A9,JUP,MMRN1,LDHB,HSPA8,PECAM1
TISSUES	BTO:0000744	Lymphocytic leukemia cell	5	361	0.74	0.0474	MYH9,GAPDH,CD47,HSPA8,PECAM1
TISSUES	BTO:0000416	Epithelium	9	624	0.76	0.0014	KRT14,KRT5,KRT10,GNAQ,ANPEP,ANTXR2,MMRN1,PECAM1,FCGBP
TISSUES	BTO:0000975	Ovary	7	482	0.76	0.0073	GAPDH,LGALS3BP,ANXA5,ATP2A3,CD47,F11R,HSPA8
TISSUES	BTO:0001090	Mouth	7	482	0.76	0.0073	KRT14,KRT5,KRT1,KRT15,S100A9,TGM3,HSPA8
TISSUES	BTO:0001253	Skin	20	1069	0.87	3.76e-10	KRT14,KRT32,GAPDH,KRT5,KRT1,KRT15,DSG1,PSMA6,LGALS3BP,KRT10,ANXA5,PRDX2,KRT2,S100A9,HRNR,DSP,EFEMP1,LDHB,DCD,HSPA8
TISSUES	BTO:0000886	Mucosa	6	318	0.88	0.0058	KRT14,KRT5,KRT1,KRT24,KRT10,S100A9
TISSUES	BTO:0000574	Hematopoietic cell	18	933	0.89	1.98e-09	KRT14,MYH9,SELPLG,GAPDH,KRT9,KRT5,KRT1,YWHAE,KRT10,GNAQ,PRDX2,SDPR,KRT2,CD47,S100A9,JUP,LDHB,HSPA8
TISSUES	BTO:0000782	T-lymphocyte	5	255	0.89	0.0141	MYH9,SDPR,CD47,S100A9,LDHB
TISSUES	BTO:0000751	Leukocyte	17	849	0.9	4.29e-09	KRT14,MYH9,SELPLG,GAPDH,KRT9,KRT5,KRT1,YWHAE,KRT10,PRDX2,SDPR,KRT2,CD47,S100A9,JUP,LDHB,HSPA8
TISSUES	BTO:0001546	Chronic lymphocytic leukemia cell	4	193	0.92	0.0345	MYH9,GAPDH,CD47,PECAM1
TISSUES	BTO:0000772	Lymphoblast	5	235	0.93	0.0106	MYH9,GAPDH,YWHAE,PRDX2,HSPA8
TISSUES	BTO:0000123	Bladder	6	274	0.94	0.003	KRT14,MYH9,GAPDH,KRT24,LDHB,SPTLC3
TISSUES	BTO:0000775	Lymphocyte	15	648	0.97	1.08e-08	KRT14,MYH9,GAPDH,KRT9,KRT5,KRT1,YWHAE,KRT10,PRDX2,SDPR,KRT2,CD47,S100A9,LDHB,HSPA8
TISSUES	BTO:0000828	Throat	5	216	0.97	0.0077	KRT14,MYH9,GAPDH,KRT5,HSPA8
UniProt Keywords	KW-0702	S-nitrosylation	3	56	1.33	0.0365	GAPDH,ANXA5,S100A9
UniProt Keywords	KW-0416	Keratin	9	136	1.42	2.77e-08	KRT14,KRT32,KRT9,KRT5,KRT1,KRT15,KRT24,KRT10,KRT2
UniProt Keywords	KW-0977	Ichthyosis	3	44	1.43	0.0248	KRT1,KRT10,KRT2
UniProt Keywords	KW-0403	Intermediate filament	9	75	1.68	3.77e-10	KRT14,KRT32,KRT9,KRT5,KRT1,KRT15,KRT24,KRT10,KRT2
UniProt Keywords	KW-0049	Antioxidant	2	14	1.76	0.0482	PRDX2,S100A9
UniProt Keywords	KW-1007	Palmoplantar keratoderma	6	36	1.81	1.95e-07	KRT14,KRT9,KRT1,DSG1,DSP,JUP
UniProt Keywords	KW-0263	Epidermolysis bullosa	3	16	1.87	0.0023	KRT14,KRT5,DSP
UniProt Keywords	KW-1183	Host cell receptor for virus entry	3	67	1.25	0.0482	SELPLG,ANPEP,F11R
UniProt Keywords	KW-0175	Coiled coil	14	2139	0.42	0.0435	KRT14,MYH9,KRT32,KRT9,KRT5,KRT1,KRT15,KRT24,KRT10,SDPR,KRT2,PKD2L1,DSP,MMRN1
UniProt Keywords	KW-0106	Calcium	9	875	0.61	0.0288	DSG1,ANXA5,PKD2L1,ATP2A3,S100A9,HRNR,TGM3,EFEMP1,SVEP1
UniProt Keywords	KW-0130	Cell adhesion	8	474	0.83	0.0032	MYH9,SELPLG,DSG1,LGALS3BP,CD47,JUP,SVEP1,PECAM1

## Sheet: Table S3
Table S3. Functions associated with proteins upregulated in CD3(-) exosomes.
#category	term ID	term description	observed gene count	background gene count	strength	false discovery rate	matching proteins in your network
COMPARTMENTS	GOCC:0034358	Plasma lipoprotein particle	3	45	1.31	0.0278	CETP,ADIPOQ,PLTP
COMPARTMENTS	GOCC:1990777	Lipoprotein particle	3	45	1.31	0.0278	CETP,ADIPOQ,PLTP
COMPARTMENTS	GOCC:0005581	Collagen trimer	3	35	1.43	0.0162	COL1A1,COL1A2,COL2A1
COMPARTMENTS	GOCC:0098644	Complex of collagen trimers	3	20	1.67	0.0047	COL1A1,COL1A2,COL2A1
COMPARTMENTS	GOCC:0005583	Fibrillar collagen trimer	3	11	1.93	0.0014	COL1A1,COL1A2,COL2A1
COMPARTMENTS	GOCC:0098643	Banded collagen fibril	3	11	1.93	0.0014	COL1A1,COL1A2,COL2A1
COMPARTMENTS	GOCC:0031091	Platelet alpha granule	4	91	1.14	0.0162	SRGN,PPBP,FGG,CD9
COMPARTMENTS	GOCC:0035579	Specific granule membrane	4	90	1.14	0.0161	SLC2A3,ADAM10,STOM,CD59
COMPARTMENTS	GOCC:0072562	Blood microparticle	6	116	1.21	0.00036	STOM,FCN2,FGG,TFRC,CD5L,ACTG2
COMPARTMENTS	GOCC:0005788	Endoplasmic reticulum lumen	5	150	1.2	0.0103	COL1A1,ADAM10,COL1A2,FGG,COL2A1
COMPARTMENTS	GOCC:1990779	Glycoprotein ib-ix-v complex	2	6	2.2	0.0179	GP9,GP1BB
COMPARTMENTS	GOCC:0070062	Extracellular exosome	13	368	1.5	1.23e-07	CTSD,ADAM10,SRI,STOM,COL1A2,HSP90AA1,TFRC,CD9,CD59,ITGB1,ANXA11,PPIA,MUC1
COMPARTMENTS	GOCC:0005584	Collagen type i trimer	2	2	2.5	0.0052	COL1A1,COL1A2
COMPARTMENTS	GOCC:0070820	Tertiary granule	6	164	1.6	0.0017	SLC2A3,CTSD,ADAM10,STOM,PPBP,CD59
COMPARTMENTS	GOCC:0042581	Specific granule	6	158	1.8	0.0014	SLC2A3,CTSD,ADAM10,STOM,CD59,ANXA11
COMPARTMENTS	GOCC:0070821	Tertiary granule membrane	4	73	1.23	0.0085	SLC2A3,ADAM10,STOM,CD59
COMPARTMENTS	GOCC:0032994	Protein-lipid complex	3	49	1.29	0.0335	CETP,ADIPOQ,PLTP
COMPARTMENTS	GOCC:0110165	Cellular anatomical entity	58	13853	0.12	0.0014	SLC2A3,CETP,PSMA3,COL1A1,PLEK,CTSD,SRGN,LRP1,ADAM10,TNC,SRI,CELSR2,TMX2,STOM,FCN2,PPBP,COL1A2,GP9,KRT17,RAB1B,GNAI2,MARCO,HSP90AA1,FGG,TFRC,STX11,TAGLN2,CD5L,CPN1,FCN1,YWHAB,MBL2,CDSN,DPP6,KRT6A,COL2A1,CD99,CD9,SSC5D,STEAP3,CD59,ITGB1,ILK,GP1BB,MASP2,CLDN5,ACTG2,UBA52,ADIPOQ,CASP14,ANXA11,PNPLA8,PLTP,PPIA,TNKS1BP1,MYL6,IFITM2,MUC1
COMPARTMENTS	GOCC:0005737	Cytoplasm	42	7871	0.23	0.0014	SLC2A3,PSMA3,COL1A1,PLEK,CTSD,SRGN,LRP1,ADAM10,SRI,STOM,PPBP,COL1A2,KRT17,RAB1B,GNAI2,MARCO,HSP90AA1,FGG,TFRC,STX11,TAGLN2,FCN1,YWHAB,KRT6A,COL2A1,CD99,CD9,STEAP3,CD59,ITGB1,ILK,ACTG2,UBA52,ADIPOQ,CASP14,ANXA11,PNPLA8,PPIA,TNKS1BP1,MYL6,IFITM2,MUC1
COMPARTMENTS	GOCC:0016020	Membrane	32	5657	0.25	0.0113	SLC2A3,PLEK,CTSD,LRP1,ADAM10,TNC,SRI,CELSR2,TMX2,STOM,GP9,RAB1B,GNAI2,MARCO,HSP90AA1,FGG,TFRC,STX11,FCN1,CDSN,DPP6,CD9,STEAP3,CD59,ITGB1,ILK,GP1BB,CLDN5,UBA52,PNPLA8,IFITM2,MUC1
COMPARTMENTS	GOCC:0032991	Protein-containing complex	29	5142	0.25	0.0266	SLC2A3,CETP,PSMA3,COL1A1,LRP1,ADAM10,STOM,COL1A2,GP9,GNAI2,HSP90AA1,FGG,TFRC,STX11,MBL2,DPP6,COL2A1,CD9,CD59,ITGB1,GP1BB,ACTG2,UBA52,ADIPOQ,PLTP,PPIA,TNKS1BP1,MYL6,IFITM2
COMPARTMENTS	GOCC:0005886	Plasma membrane	22	3531	0.29	0.0436	SLC2A3,PLEK,LRP1,ADAM10,SRI,CELSR2,STOM,GP9,GNAI2,MARCO,FGG,TFRC,FCN1,CDSN,DPP6,CD9,CD59,ITGB1,ILK,GP1BB,CLDN5,MUC1
COMPARTMENTS	GOCC:0012505	Endomembrane system	26	3080	0.43	0.00017	SLC2A3,COL1A1,CTSD,SRGN,LRP1,ADAM10,SRI,TMX2,STOM,PPBP,COL1A2,RAB1B,HSP90AA1,FGG,TFRC,FCN1,COL2A1,CD9,STEAP3,CD59,ITGB1,ADIPOQ,ANXA11,PPIA,IFITM2,MUC1
COMPARTMENTS	GOCC:0098588	Bounding membrane of organelle	15	1416	0.52	0.0028	SLC2A3,CTSD,LRP1,ADAM10,SRI,STOM,RAB1B,TFRC,CD9,STEAP3,CD59,ITGB1,UBA52,PNPLA8,IFITM2
COMPARTMENTS	GOCC:0031982	Vesicle	23	2051	0.55	1.2e-05	SLC2A3,CTSD,SRGN,LRP1,ADAM10,SRI,STOM,PPBP,COL1A2,RAB1B,MARCO,HSP90AA1,FGG,TFRC,FCN1,CD9,STEAP3,CD59,ITGB1,ANXA11,PPIA,IFITM2,MUC1
COMPARTMENTS	GOCC:0098805	Whole membrane	14	1219	0.56	0.0023	SLC2A3,CTSD,LRP1,ADAM10,STOM,RAB1B,TFRC,CD9,STEAP3,CD59,ITGB1,UBA52,PNPLA8,IFITM2
COMPARTMENTS	GOCC:0030054	Cell junction	12	1045	0.56	0.0085	LRP1,ADAM10,TNC,YWHAB,CDSN,CD9,CD59,ITGB1,ILK,CLDN5,PPIA,TNKS1BP1
COMPARTMENTS	GOCC:0005887	Integral component of plasma membrane	9	782	0.56	0.042	SLC2A3,LRP1,STOM,GP9,DPP6,CD59,ITGB1,GP1BB,MUC1
COMPARTMENTS	GOCC:0031410	Cytoplasmic vesicle	20	1709	0.57	5.07e-05	SLC2A3,CTSD,SRGN,LRP1,ADAM10,STOM,PPBP,RAB1B,MARCO,HSP90AA1,FGG,TFRC,FCN1,CD9,STEAP3,CD59,ITGB1,ANXA11,PPIA,IFITM2
COMPARTMENTS	GOCC:0097708	Intracellular vesicle	20	1711	0.57	5.07e-05	SLC2A3,CTSD,SRGN,LRP1,ADAM10,STOM,PPBP,RAB1B,MARCO,HSP90AA1,FGG,TFRC,FCN1,CD9,STEAP3,CD59,ITGB1,ANXA11,PPIA,IFITM2
COMPARTMENTS	GOCC:0098797	Plasma membrane protein complex	9	675	0.62	0.0179	LRP1,STOM,GP9,GNAI2,TFRC,DPP6,CD59,ITGB1,GP1BB
COMPARTMENTS	GOCC:0099512	Supramolecular fiber	7	490	0.65	0.0474	COL1A1,SRI,COL1A2,KRT17,KRT6A,COL2A1,ACTG2
COMPARTMENTS	GOCC:0005576	Extracellular region	31	2035	0.68	8.06e-12	CETP,COL1A1,CTSD,SRGN,ADAM10,TNC,SRI,STOM,FCN2,PPBP,COL1A2,HSP90AA1,FGG,TFRC,CD5L,CPN1,FCN1,MBL2,CDSN,COL2A1,CD9,SSC5D,CD59,ITGB1,MASP2,ACTG2,ADIPOQ,ANXA11,PLTP,PPIA,MUC1
COMPARTMENTS	GOCC:0099503	Secretory vesicle	13	785	0.72	0.00019	SLC2A3,CTSD,SRGN,ADAM10,STOM,PPBP,HSP90AA1,FGG,FCN1,CD9,CD59,ANXA11,PPIA
COMPARTMENTS	GOCC:0030141	Secretory granule	13	704	0.77	6.81e-05	SLC2A3,CTSD,SRGN,ADAM10,STOM,PPBP,HSP90AA1,FGG,FCN1,CD9,CD59,ANXA11,PPIA
COMPARTMENTS	GOCC:0009986	Cell surface	9	433	0.82	0.0014	ADAM10,FGG,TFRC,CD5L,FCN1,MBL2,CD59,ITGB1,ADIPOQ
COMPARTMENTS	GOCC:0070161	Anchoring junction	12	540	0.85	4.3e-05	LRP1,ADAM10,TNC,YWHAB,CDSN,CD9,CD59,ITGB1,ILK,CLDN5,PPIA,TNKS1BP1
COMPARTMENTS	GOCC:0030139	Endocytic vesicle	6	256	0.87	0.0131	LRP1,MARCO,HSP90AA1,TFRC,CD9,ANXA11
COMPARTMENTS	GOCC:0005615	Extracellular space	25	985	0.9	2.51e-13	CETP,COL1A1,CTSD,SRGN,ADAM10,SRI,STOM,FCN2,COL1A2,HSP90AA1,FGG,TFRC,CD5L,CPN1,MBL2,CD9,CD59,ITGB1,MASP2,ACTG2,ADIPOQ,ANXA11,PLTP,PPIA,MUC1
COMPARTMENTS	GOCC:0062023	Collagen-containing extracellular matrix	5	197	0.9	0.0269	COL1A1,TNC,COL1A2,COL2A1,SSC5D
COMPARTMENTS	GOCC:0043230	Extracellular organelle	13	451	0.96	8.48e-07	CTSD,ADAM10,SRI,STOM,COL1A2,HSP90AA1,TFRC,CD9,CD59,ITGB1,ANXA11,PPIA,MUC1
COMPARTMENTS	GOCC:1903561	Extracellular vesicle	13	444	0.97	8.48e-07	CTSD,ADAM10,SRI,STOM,COL1A2,HSP90AA1,TFRC,CD9,CD59,ITGB1,ANXA11,PPIA,MUC1
COMPARTMENTS	GOCC:0030055	Cell-substrate junction	8	262	0.98	0.00034	LRP1,ADAM10,TNC,YWHAB,CD9,ITGB1,ILK,PPIA
COMPARTMENTS	GOCC:0005925	Focal adhesion	8	255	1	0.0003	LRP1,ADAM10,TNC,YWHAB,CD9,ITGB1,ILK,PPIA
COMPARTMENTS	GOCC:0101002	ficolin-1-rich granule	4	125	1	0.0407	CTSD,HSP90AA1,FCN1,PPIA
COMPARTMENTS	GOCC:1904813	ficolin-1-rich granule lumen	4	125	1	0.0407	CTSD,HSP90AA1,FCN1,PPIA
GO Component	GO:0042470	Melanosome	7	104	1.33	8.98e-06	CTSD,STOM,HSP90AA1,TFRC,YWHAB,ITGB1,ANXA11
GO Component	GO:0005581	Collagen trimer	8	88	1.47	1.41e-07	COL1A1,FCN2,COL1A2,MARCO,FCN1,MBL2,COL2A1,ADIPOQ
GO Component	GO:0005614	Interstitial matrix	3	14	1.83	0.0013	TNC,ABI3BP,MBL2
GO Component	GO:0031091	Platelet alpha granule	4	91	1.14	0.0106	SRGN,PPBP,FGG,CD9
GO Component	GO:0035579	Specific granule membrane	4	90	1.14	0.0105	SLC2A3,ADAM10,STOM,CD59
GO Component	GO:0072562	Blood microparticle	6	115	1.21	0.00017	STOM,FCN2,FGG,TFRC,CD5L,ACTG2
GO Component	GO:0005583	Fibrillar collagen trimer	4	12	2.2	1.94e-05	COL1A1,COL1A2,MARCO,COL2A1
GO Component	GO:0062023	Collagen-containing extracellular matrix	14	396	1.5	1.6e-08	COL1A1,CTSD,TNC,ABI3BP,FCN2,COL1A2,MARCO,FGG,FCN1,MBL2,COL2A1,SSC5D,ADIPOQ,ANXA11
GO Component	GO:0005584	Collagen type i trimer	2	2	2.5	0.0034	COL1A1,COL1A2
GO Component	GO:0070820	Tertiary granule	6	164	1.6	0.0011	SLC2A3,CTSD,ADAM10,STOM,PPBP,CD59
GO Component	GO:0042581	Specific granule	6	159	1.8	0.00099	SLC2A3,CTSD,ADAM10,STOM,CD59,ANXA11
GO Component	GO:0070821	Tertiary granule membrane	4	73	1.23	0.0051	SLC2A3,ADAM10,STOM,CD59
GO Component	GO:0005886	Plasma membrane	29	5314	0.24	0.0297	SLC2A3,PLEK,LRP1,ADAM10,SRI,CELSR2,STOM,GP9,GNAI2,MARCO,HSP90AA1,FGG,TFRC,STX11,CD5L,FCN1,CDSN,DPP6,CD99,CD9,STEAP3,CD59,ITGB1,ILK,GP1BB,CLDN5,UBA52,IFITM2,MUC1
GO Component	GO:0032991	Protein-containing complex	28	5073	0.24	0.0304	CETP,PSMA3,COL1A1,LRP1,ADAM10,FCN2,COL1A2,GNAI2,MARCO,HSP90AA1,FGG,TFRC,STX11,FCN1,YWHAB,MBL2,DPP6,COL2A1,CD9,ITGB1,ILK,UBA52,ADIPOQ,PLTP,PPIA,TNKS1BP1,MYL6,IFITM2
GO Component	GO:0071944	Cell periphery	31	5432	0.26	0.0085	SLC2A3,PLEK,LRP1,ADAM10,SRI,CELSR2,STOM,GP9,KRT17,GNAI2,MARCO,HSP90AA1,FGG,TFRC,STX11,CD5L,FCN1,CDSN,DPP6,CD99,CD9,STEAP3,CD59,ITGB1,ILK,GP1BB,CLDN5,ACTG2,UBA52,IFITM2,MUC1
GO Component	GO:0012505	Endomembrane system	29	4542	0.3	0.0027	SLC2A3,COL1A1,CTSD,SRGN,LRP1,ADAM10,TNC,SRI,TMX2,STOM,PPBP,COL1A2,RAB1B,HSP90AA1,FGG,TFRC,STX11,FCN1,COL2A1,CD9,STEAP3,CD59,ITGB1,UBA52,ADIPOQ,ANXA11,PNPLA8,PPIA,MUC1
GO Component	GO:0030054	Cell junction	18	2075	0.44	0.0034	PSMA3,SRGN,LRP1,ADAM10,TNC,SRI,GNAI2,STX11,YWHAB,CDSN,CD99,CD9,CD59,ITGB1,ILK,CLDN5,PPIA,TNKS1BP1
GO Component	GO:0031982	Vesicle	35	3879	0.45	5.87e-08	SLC2A3,CETP,PSMA3,COL1A1,CTSD,SRGN,LRP1,ADAM10,SRI,STOM,FCN2,PPBP,COL1A2,RAB1B,GNAI2,MARCO,HSP90AA1,FGG,TFRC,STX11,TAGLN2,FCN1,YWHAB,KRT6A,CD9,STEAP3,CD59,ITGB1,MASP2,ACTG2,UBA52,ANXA11,PPIA,MYL6,MUC1
GO Component	GO:0098805	Whole membrane	16	1715	0.47	0.0039	SLC2A3,CTSD,LRP1,ADAM10,STOM,RAB1B,GNAI2,MARCO,TFRC,YWHAB,CD9,STEAP3,CD59,ITGB1,UBA52,PNPLA8
GO Component	GO:0031410	Cytoplasmic vesicle	23	2386	0.48	5.2e-05	SLC2A3,COL1A1,CTSD,SRGN,LRP1,ADAM10,STOM,PPBP,RAB1B,MARCO,HSP90AA1,FGG,TFRC,STX11,FCN1,YWHAB,CD9,STEAP3,CD59,ITGB1,UBA52,ANXA11,PPIA
GO Component	GO:0005576	Extracellular region	44	4166	0.52	7.58e-14	SLC2A3,CETP,PSMA3,COL1A1,PLEK,CTSD,SRGN,ADAM10,TNC,SRI,ABI3BP,STOM,FCN2,PPBP,COL1A2,RAB1B,GNAI2,MARCO,HSP90AA1,FGG,TFRC,TAGLN2,CD5L,C1orf56,CPN1,FCN1,YWHAB,MBL2,CDSN,KRT6A,COL2A1,CD9,SSC5D,CD59,ITGB1,MASP2,ACTG2,UBA52,ADIPOQ,ANXA11,PLTP,PPIA,MYL6,MUC1
GO Component	GO:0099512	Supramolecular fiber	10	939	0.53	0.0297	COL1A1,SRI,COL1A2,KRT17,MARCO,KRT6A,COL2A1,ILK,ACTG2,CASP14
GO Component	GO:0030659	Cytoplasmic vesicle membrane	9	770	0.57	0.0297	SLC2A3,LRP1,ADAM10,STOM,MARCO,TFRC,CD9,CD59,UBA52
GO Component	GO:0005615	Extracellular space	40	3195	0.6	5.05e-14	SLC2A3,CETP,PSMA3,COL1A1,CTSD,SRGN,ADAM10,TNC,SRI,ABI3BP,STOM,FCN2,PPBP,COL1A2,RAB1B,GNAI2,HSP90AA1,FGG,TFRC,TAGLN2,CD5L,CPN1,FCN1,YWHAB,MBL2,KRT6A,COL2A1,CD9,SSC5D,CD59,ITGB1,MASP2,ACTG2,UBA52,ADIPOQ,ANXA11,PLTP,PPIA,MYL6,MUC1
GO Component	GO:0070062	Extracellular exosome	27	2099	0.61	1.97e-08	SLC2A3,CETP,PSMA3,CTSD,ADAM10,SRI,STOM,FCN2,COL1A2,RAB1B,GNAI2,HSP90AA1,FGG,TFRC,TAGLN2,YWHAB,KRT6A,CD9,CD59,ITGB1,MASP2,ACTG2,UBA52,ANXA11,PPIA,MYL6,MUC1
GO Component	GO:0009986	Cell surface	11	824	0.62	0.0034	ADAM10,HSP90AA1,FGG,TFRC,CD5L,FCN1,MBL2,CD9,CD59,ITGB1,ADIPOQ
GO Component	GO:0099503	Secretory vesicle	16	1010	0.7	1.02e-05	SLC2A3,COL1A1,CTSD,SRGN,LRP1,ADAM10,STOM,PPBP,HSP90AA1,FGG,STX11,FCN1,CD9,CD59,ANXA11,PPIA
GO Component	GO:0070161	Anchoring junction	13	820	0.7	0.00013	LRP1,ADAM10,TNC,YWHAB,CDSN,CD99,CD9,CD59,ITGB1,ILK,CLDN5,PPIA,TNKS1BP1
GO Component	GO:0030141	Secretory granule	15	845	0.75	8.58e-06	SLC2A3,COL1A1,CTSD,SRGN,LRP1,ADAM10,STOM,PPBP,HSP90AA1,FGG,FCN1,CD9,CD59,ANXA11,PPIA
GO Component	GO:0009897	External side of plasma membrane	6	331	0.76	0.0285	FGG,TFRC,FCN1,CD9,CD59,ITGB1
GO Component	GO:0005788	Endoplasmic reticulum lumen	6	308	0.79	0.0202	COL1A1,ADAM10,TNC,COL1A2,FGG,COL2A1
GO Component	GO:0030139	Endocytic vesicle	6	301	0.8	0.0184	LRP1,MARCO,HSP90AA1,CD9,UBA52,ANXA11
GO Component	GO:0034774	Secretory granule lumen	7	324	0.83	0.0044	CTSD,SRGN,PPBP,HSP90AA1,FGG,FCN1,PPIA
GO Component	GO:0005925	Focal adhesion	10	405	0.89	6.1e-05	LRP1,ADAM10,TNC,YWHAB,CD99,CD9,CD59,ITGB1,ILK,PPIA
GO Component	GO:1904813	ficolin-1-rich granule lumen	4	125	1	0.0297	CTSD,HSP90AA1,FCN1,PPIA
GO Function	GO:0038024	Cargo receptor activity	5	73	1.33	0.0148	LRP1,MARCO,TFRC,CD5L,SSC5D
GO Function	GO:0005044	Scavenger receptor activity	4	46	1.43	0.0148	LRP1,MARCO,CD5L,SSC5D
GO Function	GO:0043394	Proteoglycan binding	4	37	1.52	0.0148	LRP1,TNC,FCN2,COL2A1
GO Function	GO:0030020	Extracellular matrix structural constituent conferring tensile strength	3	28	1.52	0.0315	COL1A1,COL1A2,COL2A1
GO Function	GO:0048407	Platelet-derived growth factor binding	3	11	1.93	0.0148	COL1A1,COL1A2,COL2A1
GO Function	GO:0048306	Calcium-dependent protein binding	4	63	1.3	0.0241	FCN2,MBL2,MASP2,ANXA11
GO Function	GO:0002020	Protease binding	5	138	1.6	0.0287	COL1A1,LRP1,SRI,COL1A2,ITGB1
GO Function	GO:0005201	Extracellular matrix structural constituent	5	119	1.12	0.0208	COL1A1,TNC,COL1A2,FGG,COL2A1
GO Function	GO:0005515	Protein binding	40	7026	0.25	0.0148	PSMA3,COL1A1,PLEK,LRP1,ADAM10,TNC,SRI,STOM,FCN2,PPBP,COL1A2,GNAI2,MARCO,HSP90AA1,FGG,TFRC,STX11,TAGLN2,FCN1,YWHAB,MBL2,CDSN,COL2A1,CD9,SSC5D,STEAP3,CD59,ITGB1,ILK,GP1BB,MASP2,CLDN5,UBA52,ADIPOQ,ANXA11,PLTP,PPIA,TNKS1BP1,GALE,MUC1
GO Function	GO:0042802	Identical protein binding	17	1896	0.45	0.0241	COL1A1,PLEK,ADAM10,SRI,STOM,COL1A2,HSP90AA1,FGG,TFRC,YWHAB,CDSN,COL2A1,STEAP3,GP1BB,CLDN5,ADIPOQ,GALE
GO Function	GO:0005102	Signaling receptor binding	15	1581	0.48	0.0293	LRP1,ADAM10,SRI,FCN2,PPBP,GNAI2,MARCO,FGG,FCN1,MBL2,COL2A1,CD9,ITGB1,ILK,ADIPOQ
GO Function	GO:0044877	Protein-containing complex binding	13	1216	0.53	0.0293	LRP1,ADAM10,ABI3BP,GNAI2,HSP90AA1,TFRC,YWHAB,CD9,ITGB1,ILK,ANXA11,PLTP,TNKS1BP1
GO Function	GO:0005198	Structural molecule activity	10	635	0.7	0.017	COL1A1,TNC,COL1A2,KRT17,FGG,KRT6A,COL2A1,CLDN5,UBA52,MYL6
GO Process	GO:0060351	Cartilage development involved in endochondral bone morphogenesis	3	43	1.33	0.0466	COL1A1,MBL2,COL2A1
GO Process	GO:0034109	Homotypic cell-cell adhesion	4	57	1.35	0.0077	PLEK,FGG,CD99,ILK
GO Process	GO:0052372	Modulation by symbiont of entry into host	3	42	1.35	0.045	FCN1,KRT6A,IFITM2
GO Process	GO:0070527	Platelet aggregation	3	42	1.35	0.045	PLEK,FGG,ILK
GO Process	GO:0019068	Virion assembly	3	40	1.37	0.0414	RAB1B,UBA52,PPIA
GO Process	GO:0010543	Regulation of platelet activation	3	34	1.43	0.0295	PLEK,FGG,CD9
GO Process	GO:0043277	Apoptotic cell clearance	4	43	1.47	0.004	LRP1,FCN2,MARCO,FCN1
GO Process	GO:0072378	Blood coagulation, fibrin clot formation	3	26	1.56	0.0156	GP9,FGG,GP1BB
GO Process	GO:0006278	RNA-dependent DNA biosynthetic process	3	25	1.58	0.015	HSP90AA1,PPIA,TNKS1BP1
GO Process	GO:0010874	Regulation of cholesterol efflux	4	30	1.61	0.0014	CETP,LRP1,ADIPOQ,PLTP
GO Process	GO:0014912	Negative regulation of smooth muscle cell migration	3	22	1.63	0.0114	LRP1,ILK,ADIPOQ
GO Process	GO:0032376	Positive regulation of cholesterol transport	4	28	1.65	0.0012	CETP,LRP1,ADIPOQ,PLTP
GO Process	GO:0010875	Positive regulation of cholesterol efflux	3	20	1.67	0.0092	LRP1,ADIPOQ,PLTP
GO Process	GO:0043589	Skin morphogenesis	3	11	1.93	0.0032	COL1A1,COL1A2,CDSN
GO Process	GO:0043654	Recognition of apoptotic cell	2	7	1.96	0.0418	FCN2,FCN1
GO Process	GO:0007229	Integrin-mediated signaling pathway	4	94	1.96	0.0335	PLEK,ADAM10,ITGB1,ILK
GO Process	GO:0002576	Platelet degranulation	6	129	1.16	0.0014	PLEK,SRGN,PPBP,FGG,TAGLN2,CD9
GO Process	GO:0007162	Negative regulation of cell adhesion	9	280	1.1	0.00022	COL1A1,LRP1,ADAM10,TNC,FGG,CDSN,CD9,ADIPOQ,MUC1
GO Process	GO:0006898	Receptor-mediated endocytosis	6	184	1.1	0.0065	LRP1,MARCO,HSP90AA1,TFRC,CD9,ITGB1
GO Process	GO:0071897	DNA biosynthetic process	4	101	1.1	0.0414	HSP90AA1,UBA52,PPIA,TNKS1BP1
GO Process	GO:0001867	Complement activation, lectin pathway	4	10	2.1	8.72e-05	FCN2,FCN1,MBL2,MASP2
GO Process	GO:0006909	Phagocytosis	8	210	1.8	0.00028	LRP1,FCN2,MARCO,HSP90AA1,FCN1,MBL2,ITGB1,ANXA11
GO Process	GO:1903659	Regulation of complement-dependent cytotoxicity	2	8	1.9	0.0486	CD5L,CD59
GO Process	GO:0030168	Platelet activation	8	135	1.27	2.16e-05	COL1A1,PLEK,COL1A2,GP9,FGG,CD9,ILK,GP1BB
GO Process	GO:0031623	Receptor internalization	4	64	1.29	0.0111	LRP1,TFRC,CD9,ITGB1
GO Process	GO:0065007	Biological regulation	54	12171	0.15	0.0039	CETP,PSMA3,COL1A1,PLEK,CTSD,SRGN,LRP1,ADAM10,TNC,SRI,CELSR2,ABI3BP,STOM,FCN2,PPBP,COL1A2,GP9,KRT17,RAB1B,GNAI2,MARCO,HSP90AA1,FGG,TFRC,STX11,CD5L,C1orf56,CPN1,FCN1,YWHAB,MBL2,CDSN,DPP6,KRT6A,COL2A1,CD99,CD9,SSC5D,STEAP3,CD59,ITGB1,ILK,GP1BB,MASP2,CLDN5,ACTG2,UBA52,ADIPOQ,PNPLA8,PLTP,PPIA,TNKS1BP1,IFITM2,MUC1
GO Process	GO:0050789	Regulation of biological process	51	11475	0.15	0.0115	CETP,PSMA3,COL1A1,PLEK,CTSD,SRGN,LRP1,ADAM10,TNC,SRI,CELSR2,ABI3BP,STOM,FCN2,PPBP,COL1A2,KRT17,RAB1B,GNAI2,MARCO,HSP90AA1,FGG,TFRC,CD5L,C1orf56,CPN1,FCN1,YWHAB,MBL2,CDSN,DPP6,KRT6A,COL2A1,CD99,CD9,SSC5D,STEAP3,CD59,ITGB1,ILK,GP1BB,MASP2,CLDN5,ACTG2,UBA52,ADIPOQ,PLTP,PPIA,TNKS1BP1,IFITM2,MUC1
GO Process	GO:0050896	Response to stimulus	44	8046	0.24	0.00083	SLC2A3,PSMA3,COL1A1,PLEK,CTSD,SRGN,LRP1,ADAM10,TNC,SRI,CELSR2,STOM,FCN2,PPBP,COL1A2,GP9,RAB1B,GNAI2,MARCO,HSP90AA1,FGG,TFRC,CD5L,CPN1,FCN1,YWHAB,MBL2,KRT6A,COL2A1,CD9,SSC5D,CD59,ITGB1,ILK,GP1BB,MASP2,CLDN5,UBA52,ADIPOQ,ANXA11,PPIA,TNKS1BP1,IFITM2,MUC1
GO Process	GO:0048522	Positive regulation of cellular process	31	5579	0.24	0.0375	PSMA3,COL1A1,PLEK,CTSD,LRP1,ADAM10,TNC,SRI,ABI3BP,STOM,PPBP,KRT17,RAB1B,GNAI2,MARCO,HSP90AA1,FGG,TFRC,CD5L,YWHAB,MBL2,KRT6A,CD99,ITGB1,ILK,CLDN5,UBA52,ADIPOQ,PPIA,TNKS1BP1,MUC1
GO Process	GO:0007154	Cell communication	31	5320	0.26	0.017	PSMA3,COL1A1,PLEK,SRGN,LRP1,ADAM10,TNC,SRI,CELSR2,PPBP,COL1A2,RAB1B,GNAI2,MARCO,HSP90AA1,FGG,TFRC,STX11,FCN1,YWHAB,CD59,ITGB1,ILK,GP1BB,CLDN5,UBA52,ADIPOQ,PPIA,TNKS1BP1,IFITM2,MUC1
GO Process	GO:0023052	Signaling	31	5239	0.27	0.0141	PSMA3,COL1A1,PLEK,SRGN,LRP1,ADAM10,TNC,SRI,CELSR2,PPBP,COL1A2,RAB1B,GNAI2,MARCO,HSP90AA1,FGG,TFRC,STX11,FCN1,YWHAB,CD59,ITGB1,ILK,GP1BB,CLDN5,UBA52,ADIPOQ,PPIA,TNKS1BP1,IFITM2,MUC1
GO Process	GO:0007165	Signal transduction	29	4876	0.27	0.0235	PSMA3,COL1A1,PLEK,SRGN,LRP1,ADAM10,SRI,CELSR2,PPBP,COL1A2,RAB1B,GNAI2,MARCO,HSP90AA1,FGG,TFRC,FCN1,YWHAB,CD59,ITGB1,ILK,GP1BB,CLDN5,UBA52,ADIPOQ,PPIA,TNKS1BP1,IFITM2,MUC1
GO Process	GO:0048518	Positive regulation of biological process	37	6112	0.28	0.0014	CETP,PSMA3,COL1A1,PLEK,CTSD,LRP1,ADAM10,TNC,SRI,ABI3BP,STOM,FCN2,PPBP,KRT17,RAB1B,GNAI2,MARCO,HSP90AA1,FGG,TFRC,CD5L,FCN1,YWHAB,MBL2,KRT6A,CD99,ITGB1,ILK,MASP2,CLDN5,ACTG2,UBA52,ADIPOQ,PLTP,PPIA,TNKS1BP1,MUC1
GO Process	GO:0048583	Regulation of response to stimulus	28	4114	0.33	0.0049	PSMA3,COL1A1,PLEK,LRP1,ADAM10,SRI,FCN2,COL1A2,GNAI2,MARCO,HSP90AA1,FGG,TFRC,CD5L,CPN1,FCN1,YWHAB,MBL2,COL2A1,CD99,CD9,CD59,ITGB1,ILK,MASP2,UBA52,ADIPOQ,MUC1
GO Process	GO:0051179	Localization	40	5591	0.35	1.75e-05	SLC2A3,CETP,PSMA3,COL1A1,PLEK,CTSD,SRGN,LRP1,ADAM10,SRI,CELSR2,STOM,FCN2,PPBP,COL1A2,RAB1B,MARCO,HSP90AA1,FGG,TFRC,STX11,TAGLN2,CD5L,FCN1,YWHAB,MBL2,DPP6,CD99,CD9,SSC5D,STEAP3,CD59,ITGB1,ILK,UBA52,ADIPOQ,ANXA11,PNPLA8,PLTP,PPIA
GO Process	GO:0065008	Regulation of biological quality	29	4042	0.35	0.0014	CETP,PSMA3,COL1A1,PLEK,SRGN,LRP1,ADAM10,SRI,CELSR2,COL1A2,GP9,GNAI2,HSP90AA1,FGG,TFRC,STX11,YWHAB,COL2A1,CD9,STEAP3,CD59,ITGB1,ILK,GP1BB,CLDN5,UBA52,ADIPOQ,PNPLA8,TNKS1BP1
GO Process	GO:0048513	Animal organ development	24	3197	0.37	0.0052	COL1A1,PLEK,SRGN,LRP1,ADAM10,TNC,SRI,CELSR2,TMX2,COL1A2,KRT17,TFRC,MBL2,CDSN,KRT6A,COL2A1,CD9,ITGB1,ILK,CLDN5,ACTG2,ADIPOQ,CASP14,MYL6
GO Process	GO:0010033	Response to organic substance	23	3011	0.38	0.0061	PSMA3,COL1A1,LRP1,ADAM10,TNC,PPBP,COL1A2,GNAI2,HSP90AA1,FGG,TFRC,CPN1,COL2A1,CD9,SSC5D,ITGB1,ILK,CLDN5,UBA52,ADIPOQ,PPIA,IFITM2,MUC1
GO Process	GO:0033036	Macromolecule localization	19	2473	0.38	0.0235	CETP,COL1A1,PLEK,SRGN,LRP1,SRI,RAB1B,HSP90AA1,FGG,TFRC,STX11,FCN1,YWHAB,DPP6,STEAP3,UBA52,ADIPOQ,PNPLA8,PLTP
GO Process	GO:0071310	Cellular response to organic substance	18	2369	0.38	0.0375	PSMA3,COL1A1,LRP1,TNC,PPBP,COL1A2,HSP90AA1,FGG,TFRC,COL2A1,ITGB1,ILK,CLDN5,UBA52,ADIPOQ,PPIA,IFITM2,MUC1
GO Process	GO:0051641	Cellular localization	23	2967	0.39	0.0052	SLC2A3,COL1A1,PLEK,CTSD,SRGN,ADAM10,SRI,STOM,PPBP,RAB1B,HSP90AA1,FGG,STX11,TAGLN2,FCN1,YWHAB,DPP6,CD9,CD59,ITGB1,UBA52,ADIPOQ,PPIA
GO Process	GO:0006810	Transport	35	4353	0.4	1.75e-05	SLC2A3,CETP,PSMA3,COL1A1,PLEK,CTSD,SRGN,LRP1,ADAM10,SRI,CELSR2,STOM,FCN2,PPBP,RAB1B,MARCO,HSP90AA1,FGG,TFRC,STX11,TAGLN2,CD5L,FCN1,YWHAB,MBL2,CD9,SSC5D,STEAP3,CD59,ITGB1,UBA52,ANXA11,PNPLA8,PLTP,PPIA
GO Process	GO:0006950	Response to stress	28	3485	0.4	0.00036	PSMA3,COL1A1,PLEK,LRP1,TNC,FCN2,PPBP,COL1A2,GP9,MARCO,HSP90AA1,FGG,CD5L,FCN1,MBL2,KRT6A,CD9,SSC5D,CD59,ITGB1,ILK,GP1BB,MASP2,UBA52,ADIPOQ,TNKS1BP1,IFITM2,MUC1
GO Process	GO:0051649	Establishment of localization in cell	19	2375	0.4	0.015	SLC2A3,PLEK,CTSD,SRGN,ADAM10,STOM,PPBP,RAB1B,HSP90AA1,FGG,STX11,TAGLN2,FCN1,YWHAB,CD9,CD59,ITGB1,UBA52,PPIA
GO Process	GO:0007166	Cell surface receptor signaling pathway	20	2325	0.43	0.0052	PSMA3,COL1A1,PLEK,ADAM10,CELSR2,PPBP,COL1A2,GNAI2,MARCO,HSP90AA1,FCN1,CD59,ITGB1,ILK,GP1BB,CLDN5,UBA52,PPIA,IFITM2,MUC1
GO Process	GO:0032879	Regulation of localization	24	2740	0.44	0.00065	CETP,COL1A1,CTSD,SRGN,LRP1,ADAM10,SRI,CELSR2,STOM,GNAI2,HSP90AA1,FGG,TFRC,YWHAB,MBL2,DPP6,CD99,CD9,ITGB1,ILK,CLDN5,ADIPOQ,PLTP,PPIA
GO Process	GO:0042981	Regulation of apoptotic process	14	1550	0.45	0.0375	CTSD,LRP1,ADAM10,GNAI2,FGG,TFRC,YWHAB,COL2A1,STEAP3,ITGB1,ILK,UBA52,ADIPOQ,MUC1
GO Process	GO:0009888	Tissue development	16	1760	0.46	0.015	COL1A1,SRGN,TNC,COL1A2,KRT17,TAGLN2,MBL2,CDSN,KRT6A,COL2A1,CD9,ITGB1,ILK,ACTG2,CASP14,MYL6
GO Process	GO:0048584	Positive regulation of response to stimulus	21	2257	0.47	0.0013	PSMA3,COL1A1,PLEK,LRP1,ADAM10,SRI,FCN2,GNAI2,MARCO,HSP90AA1,FGG,TFRC,FCN1,YWHAB,MBL2,ITGB1,ILK,MASP2,UBA52,ADIPOQ,MUC1
GO Process	GO:0010648	Negative regulation of cell communication	13	1382	0.47	0.0418	PSMA3,PLEK,SRGN,LRP1,SRI,GNAI2,FGG,YWHAB,COL2A1,ITGB1,UBA52,ADIPOQ,MUC1
GO Process	GO:0023057	Negative regulation of signaling	13	1385	0.47	0.0419	PSMA3,PLEK,SRGN,LRP1,SRI,GNAI2,FGG,YWHAB,COL2A1,ITGB1,UBA52,ADIPOQ,MUC1
GO Process	GO:0043067	Regulation of programmed cell death	15	1569	0.48	0.015	CTSD,LRP1,ADAM10,GNAI2,FGG,TFRC,YWHAB,CDSN,COL2A1,STEAP3,ITGB1,ILK,UBA52,ADIPOQ,MUC1
GO Process	GO:0044419	Interspecies interaction between organisms	19	1899	0.5	0.0014	PSMA3,STOM,FCN2,PPBP,RAB1B,MARCO,HSP90AA1,TFRC,FCN1,YWHAB,MBL2,KRT6A,SSC5D,ITGB1,MASP2,UBA52,ADIPOQ,PPIA,IFITM2
GO Process	GO:0002376	Immune system process	26	2481	0.52	1.88e-05	SLC2A3,PSMA3,COL1A1,PLEK,CTSD,LRP1,ADAM10,STOM,FCN2,PPBP,COL1A2,MARCO,HSP90AA1,TFRC,CD5L,FCN1,MBL2,KRT6A,CD99,SSC5D,CD59,ITGB1,MASP2,PPIA,IFITM2,MUC1
GO Process	GO:0006955	Immune response	17	1588	0.53	0.002	SLC2A3,CTSD,LRP1,ADAM10,STOM,FCN2,PPBP,MARCO,HSP90AA1,FCN1,MBL2,KRT6A,SSC5D,CD59,MASP2,PPIA,IFITM2
GO Process	GO:0051270	Regulation of cellular component movement	11	1009	0.54	0.0387	COL1A1,LRP1,ADAM10,SRI,GNAI2,CD99,CD9,ITGB1,ILK,CLDN5,ADIPOQ
GO Process	GO:0030334	Regulation of cell migration	10	865	0.56	0.045	COL1A1,LRP1,ADAM10,GNAI2,CD99,CD9,ITGB1,ILK,CLDN5,ADIPOQ
GO Process	GO:0002682	Regulation of immune system process	19	1514	0.6	0.00012	PSMA3,COL1A1,ADAM10,FCN2,COL1A2,HSP90AA1,TFRC,CD5L,CPN1,FCN1,MBL2,COL2A1,CD99,CD9,CD59,ITGB1,MASP2,ADIPOQ,MUC1
GO Process	GO:0044403	Symbiotic process	11	865	0.6	0.014	PSMA3,STOM,RAB1B,HSP90AA1,TFRC,YWHAB,MBL2,KRT6A,ITGB1,UBA52,PPIA
GO Process	GO:0071345	Cellular response to cytokine stimulus	13	1013	0.61	0.0041	PSMA3,COL1A1,PPBP,COL1A2,HSP90AA1,FGG,TFRC,ITGB1,ILK,UBA52,PPIA,IFITM2,MUC1
GO Process	GO:0007155	Cell adhesion	12	925	0.61	0.0065	PLEK,TNC,CELSR2,GP9,FGG,CDSN,CD99,CD9,ITGB1,ILK,GP1BB,CLDN5
GO Process	GO:0051050	Positive regulation of transport	12	923	0.61	0.0065	CETP,LRP1,SRI,STOM,GNAI2,FGG,YWHAB,MBL2,ITGB1,ADIPOQ,PLTP,PPIA
GO Process	GO:0034097	Response to cytokine	15	1101	0.63	0.00065	PSMA3,COL1A1,ADAM10,PPBP,COL1A2,HSP90AA1,FGG,TFRC,ITGB1,ILK,UBA52,ADIPOQ,PPIA,IFITM2,MUC1
GO Process	GO:0070201	Regulation of establishment of protein localization	9	642	0.65	0.0271	CTSD,SRGN,LRP1,SRI,STOM,FGG,YWHAB,ADIPOQ,PPIA
GO Process	GO:1903827	Regulation of cellular protein localization	8	568	0.65	0.0486	LRP1,ADAM10,STOM,HSP90AA1,TFRC,YWHAB,ITGB1,ADIPOQ
GO Process	GO:0016192	Vesicle-mediated transport	26	1805	0.66	1.34e-07	SLC2A3,PLEK,CTSD,SRGN,LRP1,ADAM10,STOM,FCN2,PPBP,RAB1B,MARCO,HSP90AA1,FGG,TFRC,STX11,TAGLN2,CD5L,FCN1,MBL2,CD9,SSC5D,CD59,ITGB1,UBA52,ANXA11,PPIA
GO Process	GO:0002252	Immune effector process	14	969	0.66	0.00075	SLC2A3,CTSD,LRP1,ADAM10,STOM,FCN2,PPBP,HSP90AA1,FCN1,MBL2,CD59,MASP2,PPIA,IFITM2
GO Process	GO:0032880	Regulation of protein localization	14	934	0.67	0.00056	CTSD,SRGN,LRP1,ADAM10,SRI,CELSR2,STOM,HSP90AA1,FGG,TFRC,YWHAB,ITGB1,ADIPOQ,PPIA
GO Process	GO:0019221	Cytokine-mediated signaling pathway	10	678	0.67	0.0097	PSMA3,PPBP,COL1A2,HSP90AA1,ITGB1,ILK,UBA52,PPIA,IFITM2,MUC1
GO Process	GO:0061024	Membrane organization	12	796	0.68	0.0022	CETP,RAB1B,MARCO,HSP90AA1,TFRC,STX11,YWHAB,CD9,CD59,UBA52,PLTP,PPIA
GO Process	GO:0002263	Cell activation involved in immune response	10	630	0.7	0.0065	SLC2A3,CTSD,LRP1,ADAM10,STOM,PPBP,HSP90AA1,FCN1,CD59,PPIA
GO Process	GO:0098609	Cell-cell adhesion	8	505	0.7	0.0279	PLEK,CELSR2,FGG,CDSN,CD99,ITGB1,ILK,CLDN5
GO Process	GO:0046903	Secretion	18	1097	0.71	1.75e-05	SLC2A3,PLEK,CTSD,SRGN,ADAM10,CELSR2,STOM,PPBP,HSP90AA1,FGG,STX11,TAGLN2,FCN1,CD9,STEAP3,CD59,PNPLA8,PPIA
GO Process	GO:0032940	Secretion by cell	16	979	0.71	5.46e-05	SLC2A3,PLEK,CTSD,SRGN,ADAM10,STOM,PPBP,HSP90AA1,FGG,STX11,TAGLN2,FCN1,CD9,STEAP3,CD59,PPIA
GO Process	GO:0002443	Leukocyte mediated immunity	11	641	0.73	0.0017	SLC2A3,CTSD,ADAM10,STOM,PPBP,HSP90AA1,FCN1,MBL2,CD59,MASP2,PPIA
GO Process	GO:0001775	Cell activation	19	1075	0.75	3.59e-06	SLC2A3,COL1A1,PLEK,CTSD,LRP1,ADAM10,STOM,PPBP,COL1A2,GP9,HSP90AA1,FGG,FCN1,CD9,CD59,ITGB1,ILK,GP1BB,PPIA
GO Process	GO:0050776	Regulation of immune response	16	896	0.75	2.16e-05	PSMA3,COL1A1,FCN2,COL1A2,HSP90AA1,TFRC,CD5L,CPN1,FCN1,MBL2,COL2A1,CD99,CD59,ITGB1,MASP2,MUC1
GO Process	GO:0030155	Regulation of cell adhesion	13	712	0.76	0.00024	COL1A1,LRP1,ADAM10,TNC,CELSR2,ABI3BP,FGG,TFRC,CDSN,CD9,ILK,ADIPOQ,MUC1
GO Process	GO:0002253	Activation of immune response	7	385	0.76	0.0304	PSMA3,FCN2,HSP90AA1,FCN1,MBL2,MASP2,MUC1
GO Process	GO:0043312	Neutrophil degranulation	9	484	0.77	0.0056	SLC2A3,CTSD,ADAM10,STOM,PPBP,HSP90AA1,FCN1,CD59,PPIA
GO Process	GO:0045055	Regulated exocytosis	15	697	0.83	1.75e-05	SLC2A3,PLEK,CTSD,SRGN,ADAM10,STOM,PPBP,HSP90AA1,FGG,STX11,TAGLN2,FCN1,CD9,CD59,PPIA
GO Process	GO:0050878	Regulation of body fluid levels	11	509	0.83	0.00036	COL1A1,PLEK,CELSR2,COL1A2,GP9,GNAI2,FGG,CD9,CD59,ILK,GP1BB
GO Process	GO:0006959	Humoral immune response	6	275	0.84	0.0332	FCN2,PPBP,FCN1,MBL2,KRT6A,MASP2
GO Process	GO:0006897	Endocytosis	10	433	0.86	0.00056	LRP1,FCN2,MARCO,HSP90AA1,TFRC,CD5L,FCN1,CD9,SSC5D,ITGB1
GO Process	GO:0030198	Extracellular matrix organization	8	338	0.87	0.0037	COL1A1,ADAM10,TNC,ABI3BP,COL1A2,FGG,COL2A1,ITGB1
GO Process	GO:0042060	Wound healing	11	439	0.9	0.00012	COL1A1,PLEK,TNC,COL1A2,GP9,FGG,KRT6A,CD9,CD59,ILK,GP1BB
GO Process	GO:1905475	Regulation of protein localization to membrane	5	198	0.9	0.0496	LRP1,ADAM10,STOM,YWHAB,ITGB1
GO Process	GO:0043903	Regulation of symbiotic process	6	230	0.92	0.0152	STOM,FCN1,MBL2,KRT6A,PPIA,IFITM2
GO Process	GO:0007596	Blood coagulation	9	303	0.97	0.00036	COL1A1,PLEK,COL1A2,GP9,FGG,CD9,CD59,ILK,GP1BB
GO Process	GO:1903034	Regulation of response to wounding	5	169	0.97	0.0298	PLEK,LRP1,FGG,CD9,ITGB1
GO Process	GO:0016485	Protein processing	5	158	1	0.0235	SRGN,ADAM10,FGG,CD5L,CPN1
InterPro	IPR008160	Collagen triple helix repeat	8	77	1.52	1.67e-06	COL1A1,FCN2,COL1A2,MARCO,FCN1,MBL2,COL2A1,ADIPOQ
InterPro	IPR014716	Fibrinogen, alpha/beta/gamma chain, C-terminal globular, subdomain 1	4	26	1.67	0.0079	TNC,FCN2,FGG,FCN1
InterPro	IPR000885	Fibrillar collagen, C-terminal	3	11	1.93	0.0144	COL1A1,COL1A2,COL2A1
InterPro	IPR002181	Fibrinogen, alpha/beta/gamma chain, C-terminal globular domain	4	32	1.6	0.0111	TNC,FCN2,FGG,FCN1
InterPro	IPR036056	Fibrinogen-like, C-terminal	4	32	1.6	0.0111	TNC,FCN2,FGG,FCN1
InterPro	IPR020837	Fibrinogen, conserved site	3	19	1.7	0.05	FCN2,FGG,FCN1
KEGG	hsa05150	Staphylococcus aureus infection	4	86	1.16	0.009	KRT17,FGG,MBL2,MASP2
KEGG	hsa04610	Complement and coagulation cascades	4	82	1.18	0.0088	FGG,MBL2,CD59,MASP2
KEGG	hsa04512	ECM-receptor interaction	7	88	1.4	6.61e-06	COL1A1,TNC,COL1A2,GP9,COL2A1,ITGB1,GP1BB
KEGG	hsa04670	Leukocyte transendothelial migration	4	109	1.6	0.0189	GNAI2,CD99,ITGB1,CLDN5
KEGG	hsa04640	Hematopoietic cell lineage	5	91	1.23	0.0015	GP9,TFRC,CD9,CD59,GP1BB
KEGG	hsa04611	Platelet activation	7	122	1.26	2.75e-05	COL1A1,COL1A2,GP9,GNAI2,FGG,ITGB1,GP1BB
KEGG	hsa04979	Cholesterol metabolism	3	48	1.29	0.0209	CETP,LRP1,PLTP
KEGG	hsa04151	PI3K-Akt signaling pathway	7	350	0.8	0.0087	COL1A1,TNC,COL1A2,HSP90AA1,YWHAB,COL2A1,ITGB1
KEGG	hsa04145	Phagosome	4	142	0.95	0.0358	MARCO,TFRC,MBL2,ITGB1
KEGG	hsa04510	Focal adhesion	6	198	0.98	0.0037	COL1A1,TNC,COL1A2,COL2A1,ITGB1,ILK
KEGG	hsa04915	Estrogen signaling pathway	4	133	0.98	0.0311	CTSD,KRT17,GNAI2,HSP90AA1
Pfam	PF01391	Collagen triple helix repeat (20 copies)	8	76	1.52	7.73e-07	COL1A1,FCN2,COL1A2,MARCO,FCN1,MBL2,COL2A1,ADIPOQ
Pfam	PF00530	Scavenger receptor cysteine-rich domain	3	21	1.65	0.0499	MARCO,CD5L,SSC5D
Pfam	PF00147	Fibrinogen beta and gamma chains, C-terminal globular domain	4	24	1.72	0.003	TNC,FCN2,FGG,FCN1
Pfam	PF01410	Fibrillar collagen C-terminal domain	3	11	1.93	0.0122	COL1A1,COL1A2,COL2A1
Reactome	HSA-3000178	ECM proteoglycans	5	76	1.31	0.00058	COL1A1,TNC,COL1A2,COL2A1,ITGB1
Reactome	HSA-8948216	Collagen chain trimerization	3	44	1.33	0.0245	COL1A1,COL1A2,COL2A1
Reactome	HSA-216083	Integrin cell surface interactions	6	85	1.35	6.51e-05	COL1A1,TNC,COL1A2,FGG,COL2A1,ITGB1
Reactome	HSA-2855086	Ficolins bind to repetitive carbohydrate structures on the target cell surface	3	4	2.37	0.00015	FCN2,FCN1,MASP2
Reactome	HSA-1442490	Collagen degradation	5	64	1.39	0.00031	COL1A1,CTSD,ADAM10,COL1A2,COL2A1
Reactome	HSA-140877	Formation of Fibrin Clot (Clotting Cascade)	3	39	1.39	0.0185	GP9,FGG,GP1BB
Reactome	HSA-3000171	Non-integrin membrane-ECM interactions	5	59	1.43	0.00023	COL1A1,TNC,COL1A2,COL2A1,ITGB1
Reactome	HSA-166658	Complement cascade	6	57	1.52	1.24e-05	FCN2,CPN1,FCN1,MBL2,CD59,MASP2
Reactome	HSA-76009	Platelet Aggregation (Plug Formation)	5	39	1.61	5.2e-05	COL1A1,COL1A2,GP9,FGG,GP1BB
Reactome	HSA-8874081	MET activates PTK2 signaling	4	30	1.61	0.00042	COL1A1,COL1A2,COL2A1,ITGB1
Reactome	HSA-2173782	Binding and Uptake of Ligands by Scavenger Receptors	6	41	1.65	3.27e-06	COL1A1,LRP1,COL1A2,MARCO,HSP90AA1,SSC5D
Reactome	HSA-3000170	Syndecan interactions	4	27	1.67	0.00031	COL1A1,TNC,COL1A2,ITGB1
Reactome	HSA-3000480	Scavenging by Class A Receptors	3	18	1.72	0.0031	COL1A1,COL1A2,MARCO
Reactome	HSA-76002	Platelet activation, signaling and aggregation	12	260	1.16	9.98e-08	COL1A1,PLEK,SRGN,PPBP,COL1A2,GP9,GNAI2,FGG,TAGLN2,CD9,GP1BB,PPIA
Reactome	HSA-75892	Platelet Adhesion to exposed collagen	5	15	2.2	2.16e-06	COL1A1,COL1A2,GP9,ITGB1,GP1BB
Reactome	HSA-430116	GP1b-IX-V activation signalling	4	12	2.2	3.85e-05	COL1A1,COL1A2,GP9,GP1BB
Reactome	HSA-446343	Localization of the PINCH-ILK-PARVIN complex to focal adhesions	2	4	2.2	0.0099	ITGB1,ILK
Reactome	HSA-5336415	Uptake and function of diphtheria toxin	2	6	2.2	0.0173	HSP90AA1,CD9
Reactome	HSA-9673221	Defective F9 activation	2	6	2.2	0.0173	GP9,GP1BB
Reactome	HSA-6806834	Signaling by MET	5	79	1.3	0.00064	COL1A1,COL1A2,COL2A1,ITGB1,UBA52
Reactome	HSA-202733	Cell surface interactions at the vascular wall	5	138	1.6	0.0066	COL1A1,COL1A2,CD99,ITGB1,PPIA
Reactome	HSA-6785807	Interleukin-4 and Interleukin-13 signaling	4	107	1.7	0.024	COL1A2,HSP90AA1,ITGB1,MUC1
Reactome	HSA-8964058	HDL remodeling	2	10	1.8	0.0313	CETP,PLTP
Reactome	HSA-198933	Immunoregulatory interactions between a Lymphoid and a non-Lymphoid cell	5	129	1.9	0.0051	COL1A1,COL1A2,COL2A1,CD99,ITGB1
Reactome	HSA-917937	Iron uptake and transport	3	56	1.23	0.0415	TFRC,STEAP3,UBA52
Reactome	HSA-114608	Platelet degranulation	7	127	1.23	4.61e-05	PLEK,SRGN,PPBP,FGG,TAGLN2,CD9,PPIA
Reactome	HSA-166662	Lectin pathway of complement activation	4	7	2.26	9.09e-06	FCN2,FCN1,MBL2,MASP2
Reactome	HSA-1643685	Disease	14	1548	0.46	0.0178	PSMA3,ADAM10,GP9,GNAI2,HSP90AA1,FGG,YWHAB,CD9,ITGB1,GP1BB,UBA52,PPIA,GALE,MUC1
Reactome	HSA-1266738	Developmental Biology	11	1087	0.5	0.0295	PSMA3,ADAM10,KRT17,HSP90AA1,KRT6A,COL2A1,ITGB1,UBA52,ADIPOQ,CASP14,MYL6
Reactome	HSA-168256	Immune System	24	1956	0.59	1.68e-06	SLC2A3,PSMA3,COL1A1,CTSD,ADAM10,STOM,FCN2,PPBP,COL1A2,HSP90AA1,FGG,CPN1,FCN1,YWHAB,MBL2,COL2A1,CD99,CD59,ITGB1,MASP2,UBA52,PPIA,IFITM2,MUC1
Reactome	HSA-382551	Transport of small molecules	9	721	0.6	0.0245	SLC2A3,CETP,PSMA3,SRI,STOM,TFRC,STEAP3,UBA52,PLTP
Reactome	HSA-1280218	Adaptive Immune System	10	743	0.63	0.008	PSMA3,COL1A1,CTSD,COL1A2,YWHAB,COL2A1,CD99,ITGB1,UBA52,PPIA
Reactome	HSA-9006934	Signaling by Receptor Tyrosine Kinases	8	502	0.7	0.0128	COL1A1,ADAM10,COL1A2,HSP90AA1,YWHAB,COL2A1,ITGB1,UBA52
Reactome	HSA-449147	Signaling by Interleukins	7	440	0.7	0.0268	PSMA3,COL1A2,HSP90AA1,ITGB1,UBA52,PPIA,MUC1
Reactome	HSA-168249	Innate Immune System	17	1025	0.72	5.15e-06	SLC2A3,PSMA3,CTSD,ADAM10,STOM,FCN2,PPBP,HSP90AA1,FGG,CPN1,FCN1,MBL2,CD59,MASP2,UBA52,PPIA,MUC1
Reactome	HSA-5653656	Vesicle-mediated transport	11	660	0.72	0.00065	COL1A1,LRP1,COL1A2,RAB1B,MARCO,HSP90AA1,TFRC,YWHAB,SSC5D,CD59,UBA52
Reactome	HSA-6798695	Neutrophil degranulation	9	473	0.78	0.0016	SLC2A3,CTSD,ADAM10,STOM,PPBP,HSP90AA1,FCN1,CD59,PPIA
Reactome	HSA-109582	Hemostasis	15	605	0.89	6.72e-07	COL1A1,PLEK,SRGN,SRI,PPBP,COL1A2,GP9,GNAI2,FGG,TAGLN2,CD99,CD9,ITGB1,GP1BB,PPIA
Reactome	HSA-1474244	Extracellular matrix organization	8	301	0.92	0.00058	COL1A1,CTSD,ADAM10,TNC,COL1A2,FGG,COL2A1,ITGB1
SMART	SM00202	Scavenger receptor Cys-rich	3	23	1.61	0.0269	MARCO,CD5L,SSC5D
SMART	SM00186	Fibrinogen-related domains (FReDs)	4	27	1.67	0.0019	TNC,FCN2,FGG,FCN1
STRING clusters	CL:19970	Initial triggering of complement, and Complement component 3 deficiency	4	21	1.78	0.0016	FCN2,FCN1,MBL2,MASP2
STRING clusters	CL:19706	Mixed, incl. complement and coagulation cascades, and lipoprotein particle	9	182	1.18	3.83e-05	CETP,FCN2,GP9,FGG,FCN1,MBL2,GP1BB,MASP2,PLTP
STRING clusters	CL:19977	Complement component C4-A, and Complement activation lectin pathway	3	6	2.2	0.0028	FCN2,MBL2,MASP2
STRING clusters	CL:17853	Mixed, incl. tetraspanin family, and annexin	4	63	1.3	0.0271	ADAM10,SRI,CD9,ANXA11
STRING clusters	CL:19707	Mixed, incl. formation of fibrin clot (clotting cascade), and lipoprotein particle	5	129	1.9	0.0271	CETP,GP9,FGG,GP1BB,PLTP
STRING clusters	CL:16512	Fibrillar collagen, C-terminal, and Lateral cystocele	3	12	1.9	0.0101	COL1A1,COL1A2,COL2A1
TISSUES	BTO:0000294	Dermis	2	13	1.67	0.0407	COL1A2,ADIPOQ
TISSUES	BTO:0000020	Abdomen	4	90	1.14	0.0101	SRI,HSP90AA1,ADIPOQ,PPIA
TISSUES	BTO:0004850	Bone marrow cell	8	170	1.16	9.75e-06	CTSD,LRP1,FCN2,MARCO,TFRC,MBL2,ITGB1,PLTP
TISSUES	BTO:0000392	Plasma cell	7	137	1.21	3e-05	CTSD,LRP1,FCN2,MARCO,TFRC,MBL2,ITGB1
TISSUES	BTO:0000091	Ascites	3	58	1.21	0.0392	SRI,HSP90AA1,PPIA
TISSUES	BTO:0000132	Blood platelet	11	337	1.1	2.51e-06	CTSD,ADAM10,PPBP,GP9,HSP90AA1,FGG,TAGLN2,YWHAB,CD9,GP1BB,PPIA
TISSUES	BTO:0000849	Melanoma cell line	5	145	1.4	0.0054	CTSD,HSP90AA1,TFRC,ITGB1,ANXA11
TISSUES	BTO:0000368	Ear	3	51	1.27	0.0287	COL1A1,COL1A2,COL2A1
TISSUES	BTO:0000042	Animal	62	14895	0.12	6.77e-06	SLC2A3,CETP,PSMA3,COL1A1,PLEK,CTSD,SRGN,LRP1,ADAM10,TNC,SRI,CELSR2,TMX2,ABI3BP,STOM,FCN2,PPBP,COL1A2,GP9,KRT17,RAB1B,GNAI2,MARCO,HSP90AA1,FGG,TFRC,STX11,TAGLN2,CD5L,C1orf56,ZNF275,CPN1,FCN1,YWHAB,MBL2,CDSN,DPP6,KRT6A,COL2A1,CD99,CD9,SSC5D,STEAP3,CD59,ITGB1,ILK,GP1BB,MASP2,CLDN5,ACTG2,UBA52,ADIPOQ,CASP14,ANXA11,PNPLA8,PLTP,PPIA,TNKS1BP1,MYL6,GALE,IFITM2,MUC1
TISSUES	BTO:0001489	Whole body	58	12619	0.16	9.9e-06	SLC2A3,CETP,PSMA3,COL1A1,PLEK,CTSD,SRGN,LRP1,ADAM10,TNC,SRI,CELSR2,TMX2,STOM,FCN2,PPBP,COL1A2,GP9,KRT17,RAB1B,GNAI2,MARCO,HSP90AA1,FGG,TFRC,TAGLN2,CD5L,C1orf56,CPN1,FCN1,YWHAB,MBL2,CDSN,DPP6,KRT6A,COL2A1,CD99,CD9,STEAP3,CD59,ITGB1,ILK,GP1BB,MASP2,CLDN5,ACTG2,UBA52,ADIPOQ,CASP14,ANXA11,PNPLA8,PLTP,PPIA,TNKS1BP1,MYL6,GALE,IFITM2,MUC1
TISSUES	BTO:0000081	Reproductive system	36	6107	0.27	0.0008	SLC2A3,PSMA3,COL1A1,CTSD,LRP1,ADAM10,TMX2,STOM,COL1A2,KRT17,RAB1B,GNAI2,HSP90AA1,TFRC,TAGLN2,C1orf56,YWHAB,CDSN,KRT6A,CD99,CD9,STEAP3,CD59,ITGB1,ILK,GP1BB,CLDN5,ACTG2,UBA52,ANXA11,PNPLA8,PLTP,PPIA,TNKS1BP1,MYL6,GALE
TISSUES	BTO:0000083	Female reproductive system	34	5799	0.27	0.0018	SLC2A3,PSMA3,COL1A1,CTSD,LRP1,ADAM10,TMX2,STOM,COL1A2,KRT17,RAB1B,GNAI2,HSP90AA1,TFRC,TAGLN2,C1orf56,YWHAB,KRT6A,CD99,CD9,STEAP3,CD59,ITGB1,ILK,GP1BB,ACTG2,UBA52,ANXA11,PNPLA8,PLTP,PPIA,TNKS1BP1,MYL6,GALE
TISSUES	BTO:0001488	Endocrine gland	41	6036	0.33	2.62e-06	SLC2A3,CETP,PSMA3,COL1A1,CTSD,LRP1,ADAM10,TNC,SRI,TMX2,STOM,FCN2,COL1A2,KRT17,RAB1B,GNAI2,HSP90AA1,FGG,TFRC,TAGLN2,CD5L,C1orf56,CPN1,YWHAB,MBL2,KRT6A,CD99,CD9,STEAP3,CD59,ITGB1,MASP2,CLDN5,ACTG2,UBA52,ANXA11,PLTP,PPIA,TNKS1BP1,MYL6,MUC1
TISSUES	BTO:0001491	Viscus	42	5020	0.42	3.57e-09	SLC2A3,CETP,PSMA3,COL1A1,PLEK,CTSD,LRP1,ADAM10,TNC,SRI,TMX2,STOM,FCN2,COL1A2,KRT17,RAB1B,GNAI2,HSP90AA1,FGG,TFRC,TAGLN2,CD5L,CPN1,YWHAB,MBL2,KRT6A,CD99,CD9,STEAP3,CD59,ITGB1,ILK,MASP2,ACTG2,UBA52,ANXA11,PLTP,PPIA,TNKS1BP1,MYL6,GALE,MUC1
TISSUES	BTO:0000570	Hematopoietic system	25	2543	0.49	9.66e-06	SLC2A3,CETP,PSMA3,COL1A1,PLEK,CTSD,LRP1,ADAM10,STOM,PPBP,GP9,HSP90AA1,FGG,TFRC,TAGLN2,CD5L,YWHAB,CD99,CD9,CD59,GP1BB,UBA52,ANXA11,PPIA,MYL6
TISSUES	BTO:0000174	Embryonic structure	21	2132	0.49	0.00011	PSMA3,COL1A1,CTSD,LRP1,ADAM10,STOM,COL1A2,RAB1B,HSP90AA1,TFRC,TAGLN2,COL2A1,CD59,ITGB1,ILK,GP1BB,UBA52,PLTP,PPIA,TNKS1BP1,MYL6
TISSUES	BTO:0000511	Gastrointestinal tract	17	1680	0.5	0.00085	SLC2A3,COL1A1,CTSD,SRI,COL1A2,HSP90AA1,YWHAB,CD99,CD9,STEAP3,CD59,ILK,ACTG2,PPIA,MYL6,GALE,MUC1
TISSUES	BTO:0000203	Respiratory system	15	1436	0.52	0.0019	SLC2A3,COL1A1,CTSD,SRGN,COL1A2,MARCO,HSP90AA1,FCN1,CD59,ITGB1,CLDN5,PPIA,MYL6,IFITM2,MUC1
TISSUES	BTO:0003099	Internal female genital organ	28	2593	0.53	3.75e-07	SLC2A3,COL1A1,CTSD,LRP1,ADAM10,STOM,COL1A2,KRT17,RAB1B,GNAI2,HSP90AA1,TFRC,TAGLN2,KRT6A,CD99,CD9,CD59,ITGB1,ILK,GP1BB,ACTG2,UBA52,PNPLA8,PLTP,PPIA,TNKS1BP1,MYL6,GALE
TISSUES	BTO:0000753	Lymphoid tissue	16	1496	0.53	0.00085	SLC2A3,CETP,PSMA3,COL1A1,PLEK,CTSD,PPBP,HSP90AA1,CD5L,YWHAB,CD99,CD59,UBA52,ANXA11,PPIA,MYL6
TISSUES	BTO:0000058	Alimentary canal	21	1865	0.55	1.48e-05	SLC2A3,COL1A1,CTSD,SRI,COL1A2,HSP90AA1,TFRC,YWHAB,KRT6A,CD99,CD9,STEAP3,CD59,ITGB1,ILK,ACTG2,ANXA11,PPIA,MYL6,GALE,MUC1
TISSUES	BTO:0000763	Lung	13	1162	0.55	0.0032	COL1A1,CTSD,SRGN,COL1A2,MARCO,HSP90AA1,FCN1,CD59,CLDN5,PPIA,MYL6,IFITM2,MUC1
TISSUES	BTO:0000634	Integument	24	1970	0.58	8.49e-07	COL1A1,CTSD,LRP1,SRI,COL1A2,KRT17,GNAI2,HSP90AA1,TAGLN2,YWHAB,CDSN,KRT6A,CD99,CD59,ITGB1,ILK,CLDN5,ACTG2,ADIPOQ,CASP14,PLTP,PPIA,TNKS1BP1,GALE
TISSUES	BTO:0000345	Digestive gland	33	2645	0.6	3.2e-10	CETP,PSMA3,COL1A1,CTSD,LRP1,ADAM10,TNC,TMX2,STOM,FCN2,COL1A2,KRT17,RAB1B,GNAI2,HSP90AA1,FGG,TFRC,TAGLN2,CD5L,CPN1,YWHAB,MBL2,KRT6A,CD99,STEAP3,CD59,ITGB1,MASP2,ANXA11,PLTP,PPIA,TNKS1BP1,MYL6
TISSUES	BTO:0000089	Blood	21	1675	0.6	4.09e-06	SLC2A3,PSMA3,PLEK,CTSD,LRP1,ADAM10,STOM,PPBP,GP9,HSP90AA1,FGG,TFRC,TAGLN2,YWHAB,CD99,CD9,CD59,GP1BB,UBA52,PPIA,MYL6
TISSUES	BTO:0000751	Leukocyte	11	849	0.61	0.0035	PSMA3,PLEK,PPBP,HSP90AA1,YWHAB,CD99,CD9,CD59,UBA52,PPIA,MYL6
TISSUES	BTO:0000421	Connective tissue	12	871	0.64	0.0011	SLC2A3,COL1A1,TNC,COL1A2,RAB1B,MARCO,HSP90AA1,COL2A1,ADIPOQ,PNPLA8,PLTP,PPIA
TISSUES	BTO:0001493	Trunk	13	927	0.65	0.00042	SLC2A3,COL1A1,SRI,TMX2,KRT17,GNAI2,HSP90AA1,YWHAB,KRT6A,ACTG2,ADIPOQ,PPIA,MUC1
TISSUES	BTO:0000759	Liver	27	1882	0.66	3.57e-09	CETP,COL1A1,CTSD,LRP1,ADAM10,TNC,STOM,FCN2,COL1A2,GNAI2,HSP90AA1,FGG,TFRC,CD5L,CPN1,YWHAB,MBL2,CD99,STEAP3,CD59,ITGB1,MASP2,ANXA11,PLTP,PPIA,TNKS1BP1,MYL6
TISSUES	BTO:0001078	Placenta	18	1176	0.68	3.12e-06	COL1A1,CTSD,LRP1,ADAM10,STOM,COL1A2,RAB1B,HSP90AA1,TFRC,TAGLN2,CD59,ITGB1,ILK,GP1BB,UBA52,PLTP,PPIA,MYL6
TISSUES	BTO:0000574	Hematopoietic cell	14	933	0.68	9.28e-05	PSMA3,PLEK,STOM,PPBP,HSP90AA1,TFRC,YWHAB,CD99,CD9,CD59,GP1BB,UBA52,PPIA,MYL6
TISSUES	BTO:0000775	Lymphocyte	10	648	0.69	0.002	PSMA3,PLEK,PPBP,HSP90AA1,YWHAB,CD99,CD59,UBA52,PPIA,MYL6
TISSUES	BTO:0001129	Prostate gland	7	446	0.69	0.0243	HSP90AA1,KRT6A,CLDN5,ACTG2,UBA52,PPIA,MYL6
TISSUES	BTO:0001486	Skeletal system	19	1203	0.7	9.55e-07	SLC2A3,PSMA3,COL1A1,CTSD,LRP1,TNC,STOM,FCN2,COL1A2,MARCO,HSP90AA1,FGG,TFRC,TAGLN2,MBL2,COL2A1,ITGB1,PNPLA8,PLTP
TISSUES	BTO:0001253	Skin	19	1069	0.75	2.42e-07	COL1A1,CTSD,LRP1,SRI,COL1A2,KRT17,GNAI2,HSP90AA1,TAGLN2,YWHAB,CDSN,KRT6A,CD99,CD59,ITGB1,ADIPOQ,CASP14,PPIA,GALE
TISSUES	BTO:0000988	Pancreas	11	568	0.79	0.00013	PSMA3,COL1A1,CTSD,COL1A2,KRT17,RAB1B,HSP90AA1,KRT6A,CD99,PPIA,MYL6
TISSUES	BTO:0000141	Bone marrow	11	478	0.86	3e-05	PSMA3,CTSD,LRP1,STOM,FCN2,MARCO,TFRC,TAGLN2,MBL2,ITGB1,PLTP
TISSUES	BTO:0000828	Throat	5	216	0.86	0.0287	COL1A1,TMX2,KRT17,KRT6A,MUC1
TISSUES	BTO:0000782	T-lymphocyte	6	255	0.87	0.008	PSMA3,PLEK,PPBP,HSP90AA1,CD99,CD59
TISSUES	BTO:0000255	Brain cell line	4	145	0.94	0.0481	COL1A1,HSP90AA1,CLDN5,PPIA
TISSUES	BTO:0000140	Bone	4	138	0.96	0.0411	COL1A1,COL1A2,HSP90AA1,COL2A1
UniProt Keywords	KW-0094	Blood coagulation	3	46	1.31	0.0241	GP9,FGG,GP1BB
UniProt Keywords	KW-0087	Bernard Soulier syndrome	2	3	2.32	0.0066	GP9,GP1BB
UniProt Keywords	KW-1018	Complement activation lectin pathway	2	3	2.32	0.0066	FCN2,MBL2
UniProt Keywords	KW-0176	Collagen	8	82	1.49	1.33e-07	COL1A1,FCN2,COL1A2,MARCO,FCN1,MBL2,COL2A1,ADIPOQ
UniProt Keywords	KW-0379	Hydroxylation	8	140	1.26	2.8e-06	COL1A1,CELSR2,FCN2,COL1A2,MBL2,COL2A1,MASP2,ADIPOQ
UniProt Keywords	KW-9995	Disease	26	3996	0.31	0.0066	CETP,COL1A1,CTSD,LRP1,ADAM10,TNC,ABI3BP,COL1A2,GP9,KRT17,FGG,TFRC,STX11,CPN1,DPP6,KRT6A,COL2A1,CD59,GP1BB,MASP2,ACTG2,ADIPOQ,CASP14,ANXA11,GALE,MUC1
UniProt Keywords	KW-0225	Disease mutation	23	3145	0.36	0.0044	CETP,COL1A1,CTSD,LRP1,ADAM10,TNC,ABI3BP,COL1A2,GP9,KRT17,FGG,TFRC,CPN1,DPP6,KRT6A,COL2A1,CD59,GP1BB,MASP2,ACTG2,ADIPOQ,ANXA11,GALE
UniProt Keywords	KW-0325	Glycoprotein	33	4349	0.38	1.23e-05	SLC2A3,CETP,COL1A1,CTSD,SRGN,LRP1,ADAM10,TNC,CELSR2,ABI3BP,FCN2,COL1A2,GP9,MARCO,FGG,TFRC,CD5L,CPN1,FCN1,DPP6,COL2A1,CD99,CD9,SSC5D,STEAP3,CD59,ITGB1,GP1BB,ADIPOQ,PNPLA8,PLTP,PPIA,MUC1
UniProt Keywords	KW-1015	Disulfide bond	30	3304	0.46	1.86e-06	CETP,COL1A1,CTSD,SRGN,LRP1,ADAM10,TNC,CELSR2,FCN2,PPBP,COL1A2,GP9,MARCO,FGG,TFRC,CD5L,CPN1,FCN1,MBL2,DPP6,COL2A1,CD9,SSC5D,CD59,ITGB1,GP1BB,MASP2,ADIPOQ,PLTP,MUC1
UniProt Keywords	KW-0732	Signal	31	3233	0.48	3e-07	CETP,COL1A1,CTSD,SRGN,LRP1,ADAM10,TNC,CELSR2,TMX2,ABI3BP,FCN2,PPBP,COL1A2,GP9,FGG,CD5L,C1orf56,CPN1,FCN1,MBL2,CDSN,COL2A1,CD99,SSC5D,CD59,ITGB1,GP1BB,MASP2,ADIPOQ,PLTP,MUC1
UniProt Keywords	KW-0964	Secreted	25	1818	0.64	5.66e-08	CETP,COL1A1,CTSD,SRGN,TNC,ABI3BP,FCN2,PPBP,COL1A2,FGG,TFRC,CD5L,C1orf56,CPN1,FCN1,MBL2,COL2A1,CD9,SSC5D,CD59,MASP2,ADIPOQ,PLTP,PPIA,MUC1
UniProt Keywords	KW-0106	Calcium	13	875	0.67	0.00031	COL1A1,LRP1,SRI,CELSR2,FCN2,COL1A2,FGG,FCN1,MBL2,COL2A1,ITGB1,MASP2,ANXA11
UniProt Keywords	KW-0391	Immunity	8	522	0.68	0.0131	FCN2,MARCO,CD5L,FCN1,MBL2,SSC5D,MASP2,IFITM2
UniProt Keywords	KW-0564	Palmitate	6	339	0.75	0.032	STOM,GNAI2,TFRC,CD9,IFITM2,MUC1
UniProt Keywords	KW-0399	Innate immunity	7	324	0.83	0.0061	FCN2,MARCO,FCN1,MBL2,SSC5D,MASP2,IFITM2
WikiPathways	WP2806	Complement system	9	97	1.47	3e-08	FCN2,GNAI2,FGG,CPN1,FCN1,MBL2,CD59,MASP2,ADIPOQ
WikiPathways	WP430	Statin inhibition of cholesterol production	3	29	1.51	0.0105	CETP,LRP1,PLTP
WikiPathways	WP5111	Familial hyperlipidemia type 4	3	21	1.65	0.0055	CETP,LRP1,PLTP
WikiPathways	WP5108	Familial hyperlipidemia type 1	3	17	1.75	0.0055	CETP,LRP1,PLTP
WikiPathways	WP5112	Familial hyperlipidemia type 5	3	14	1.83	0.0055	CETP,LRP1,PLTP
WikiPathways	WP5110	Familial hyperlipidemia type 3	3	13	1.83	0.0055	CETP,LRP1,PLTP
WikiPathways	WP5090	Complement system in neuronal development and plasticity	5	105	1.18	0.0055	FCN2,FCN1,MBL2,CD59,MASP2
WikiPathways	WP4172	PI3K-Akt signaling pathway	6	336	0.75	0.0491	COL1A1,TNC,COL1A2,HSP90AA1,COL2A1,ITGB1
WikiPathways	WP3932	Focal adhesion: PI3K-Akt-mTOR-signaling pathway	7	302	0.86	0.0055	SLC2A3,COL1A1,TNC,COL1A2,HSP90AA1,COL2A1,ITGB1
WikiPathways	WP306	Focal adhesion	6	196	0.99	0.0055	COL1A1,TNC,COL1A2,COL2A1,ITGB1,ILK

## Sheet: Table S4
Table S4. Metabolites identified in CD3(+) and CD3(-) exosomes from plasma of healthy donors.
Metabolite	Metabolite class	number of measurements >LOD		median value		CD3(+)exo/CD3(-)exo (median values)	significance of differences CD3(+)exo vs. CD3(-)exo
		CD3(+)exo	CD3(-)exo	CD3(+)exo	CD3(-)exo		Fisher p-value	Fisher q-value	Wicoxon p-value	Wilcoxon q-value
AC(15:0)	Acylcarnitines	10	3	0.192027	0	1000	0.00309598	0.026903	0.00013173	0.000460198
CE(19:2)	Cholesterol Esters	5	2	0.425295	0	1000	0.349845	0.760009
TG(48:3)	Triglycerides	7	1	0.280839	0	1000	0.0197666	0.1186	0.0168947	0.028947
TG(49:2)	Triglycerides	6	2	0.497867	0	1000	0.169802	0.535885	0.0365848	0.0549794
LPC(12:0)	Lyso-phosphatidylcholines	5	2	0.967109	0	1000	0.349845	0.760009
PC(34:0)	Phosphatidylcholines	10	3	4.49668	0	1000	0.00309598	0.026903	0.000179701	0.000531132
PC(36:0)	Phosphatidylcholines	6	1	0.462969	0	1000	0.0572755	0.262426	0.014719	0.0253809
PC(39:0)	Phosphatidylcholines	10	3	1.3691	0	1000	0.00309598	0.026903	0.000243759	0.000636613
PC(44:3)	Phosphatidylcholines	6	4	3.9243	0	1000	0.649917	1	0.0824702	0.114945
PC-O(26:1)	Phosphatidylcholines	9	4	0.417211	0	1000	0.0572755	0.262426	0.00175956	0.00366915
PC-O(40:0)	Phosphatidylcholines	10	2	1.07254	0	1000	0.000714456	0.0100024	0.000110671	0.000402303
PC-O(40:4)	Phosphatidylcholines	10	3	6.76065	0	1000	0.00309598	0.026903	0.000243759	0.000636613
PC-O(42:3)	Phosphatidylcholines	7	3	0.0676189	0	1000	0.178895	0.535885	0.0237266	0.037766
PC-O(44:4)	Phosphatidylcholines	6	2	0.12695	0	1000	0.169802	0.535885	0.0295786	0.0462595
SM(31:1)	Sphingomyelins	7	3	0.948304	0	1000	0.178895	0.535885	0.0237266	0.037766
SM(33:2)	Sphingomyelins	5	2	0.226955	0	1000	0.349845	0.760009
PC-O(35:4)	Phosphatidylcholines	10	6	1.62297	0.00872516	186.01	0.0866873	0.291269	0.000172654	0.000531132
LPC-O(18:2)	Lyso-phosphatidylcholines	7	5	1.53135	0.009934	154.152	0.649917	1	0.0349719	0.0531493
TG(51:1)	Triglycerides	10	10	0.3595	0.00739616	48.6064			0.00105003	0.00235383
PC(41:3)	Phosphatidylcholines	6	5	1.0677	0.0473182	22.5642	1	1	0.142601	0.186211
PC-O(40:1)	Phosphatidylcholines	7	8	0.386658	0.0172083	22.4693	1	1	0.269406	0.32941
TG(53:4)	Triglycerides	9	9	0.167395	0.007482	22.3731	1	1	0.00394033	0.00768079
PC-O(40:2)	Phosphatidylcholines	9	9	7.33088	0.399128	18.3672	1	1	0.0190648	0.0318536
AC(19:0)	Acylcarnitines	7	5	0.00347691	0.00024835	14	0.649917	1	0.0349719	0.0531493
AC(4:0-OH)	Acylcarnitines	10	7	0.109746	0.00798251	13.7483	0.210526	0.535885	0.000178614	0.000531132
PC-O(42:1)	Phosphatidylcholines	8	7	0.558145	0.0420451	13.2749	1	1	0.0435449	0.0647159
CE(17:0)	Cholesterol Esters	10	6	81.1226	6.29277	12.8914	0.0866873	0.291269	0.000172654	0.000531132
AC(10:3)	Acylcarnitines	10	6	0.0176632	0.00145312	12.1553	0.0866873	0.291269	0.000172654	0.000531132
TG(53:6)	Triglycerides	7	6	0.0698465	0.00579905	12.0445	1	1	0.134036	0.180279
H1	Sugars	10	10	682.889	61.8915	11.0336			0.00150469	0.00316219
TG(56:9)	Triglycerides	10	5	2.17584	0.197662	11.0079	0.0325077	0.157538	0.000397406	0.000980754
AC(7:0)	Acylcarnitines	9	9	0.0133631	0.00126206	10.5883	1	1	0.00106086	0.00235844
AC(3:0-DC)	Acylcarnitines	10	10	0.0284105	0.00270868	10.4887			1.08251e-05	5.29445e-05
AC(8:0)	Acylcarnitines	10	10	0.0246847	0.00248223	9.94456			1.08251e-05	5.29445e-05
AC(10:2)	Acylcarnitines	8	7	0.00740397	0.000744649	9.94291	1	1	0.0110091	0.0198755
AC(5:1)	Acylcarnitines	10	10	0.045724	0.00460245	9.93471			1.08251e-05	5.29445e-05
AC(7:0-DC)	Acylcarnitines	10	10	0.0473171	0.00482031	9.81619			1.08251e-05	5.29445e-05
AC(8:1)	Acylcarnitines	10	10	0.0141866	0.00144734	9.80186			1.08251e-05	5.29445e-05
PC-O(33:2)	Phosphatidylcholines	10	9	14.6014	1.52814	9.555	1	1	1.08251e-05	5.29445e-05
PC(42:2)	Phosphatidylcholines	6	6	0.154466	0.0163071	9.47233	1	1	0.257449	0.319142
AC(5:0-OH)	Acylcarnitines	10	10	0.0259085	0.00273699	9.46604			1.08251e-05	5.29445e-05
AC(3:0-OH)	Acylcarnitines	10	10	0.125866	0.0145816	8.63182			1.08251e-05	5.29445e-05
AC(4:1)	Acylcarnitines	10	8	0.0372715	0.00436223	8.54413	0.473684	0.858766	0.000181651	0.000531132
AC(10:1)	Acylcarnitines	10	9	0.00860906	0.00102066	8.43479	1	1	1.08251e-05	5.29445e-05
PC-O(42:0)	Phosphatidylcholines	7	5	0.0536539	0.00647364	8.28805	0.649917	1	0.0349719	0.0531493
AC(5:0)	Acylcarnitines	10	10	0.0454301	0.00553455	8.20845			1.08251e-05	5.29445e-05
PC(42:4)	Phosphatidylcholines	8	7	1.92787	0.245843	7.84186	1	1	0.0223213	0.0361713
AC(12:0)	Acylcarnitines	10	10	0.0128968	0.00164567	7.83679			1.08251e-05	5.29445e-05
AC(4:0)	Acylcarnitines	10	9	0.0585626	0.00766248	7.64278	1	1	1.08251e-05	5.29445e-05
PC(43:2)	Phosphatidylcholines	10	8	3.86129	0.516025	7.48276	0.473684	0.858766	0.00149386	0.00316219
Cer(42:2)	Ceramides	10	10	6.9638	0.936225	7.43817			1.08251e-05	5.29445e-05
AC(14:2-OH)	Acylcarnitines	7	8	0.0208599	0.00283369	7.36141	1	1	0.086709	0.119614
Total Ceramides	Ceramides	10	10	9.81271	1.3441	7.30056			1.08251e-05	5.29445e-05
AC(3:1)	Acylcarnitines	9	10	0.0355969	0.00502605	7.08249	1	1	0.00150469	0.00316219
PC(42:3)	Phosphatidylcholines	10	9	18.4592	2.61796	7.05101	1	1	1.08251e-05	5.29445e-05
AC(16:0-OH)	Acylcarnitines	6	7	0.0030992	0.000441544	7.01899	1	1	0.236333	0.298468
PC(42:10)	Phosphatidylcholines	10	10	66.3519	9.51644	6.97234			1.08251e-05	5.29445e-05
AC(11:0)	Acylcarnitines	10	10	0.0104256	0.0015428	6.75757			1.08251e-05	5.29445e-05
PC-O(28:0)	Phosphatidylcholines	10	10	191.189	30.2688	6.31639			1.08251e-05	5.29445e-05
AC(14:0)	Acylcarnitines	9	10	0.00703332	0.00112264	6.26498	1	1	0.00150469	0.00316219
PC(37:6)	Phosphatidylcholines	8	9	3.80116	0.615146	6.17928	1	1	0.0184243	0.0309759
SM(44:1)	Sphingomyelins	8	8	0.0870353	0.0140855	6.17909	1	1	0.0136613	0.0238629
PC(38:0)	Phosphatidylcholines	10	10	59.3089	9.77457	6.06767			1.08251e-05	5.29445e-05
PC-O(30:0)	Phosphatidylcholines	5	5	0.0180605	0.00298439	6.05165	1	1
PC(28:1)	Phosphatidylcholines	8	7	0.324107	0.0550149	5.89126	1	1	0.0110091	0.0198755
PC-O(36:2)	Phosphatidylcholines	10	10	9.76351	1.66099	5.87811			1.08251e-05	5.29445e-05
PC(41:8)	Phosphatidylcholines	10	7	0.0555332	0.00945407	5.874	0.210526	0.535885	2.16502e-05	9.87101e-05
AC(16:2-OH)	Acylcarnitines	10	10	0.0277716	0.00479471	5.79213			1.08251e-05	5.29445e-05
PC-O(29:0)	Phosphatidylcholines	8	8	0.0573824	0.00996719	5.75713	1	1	0.0136613	0.0238629
CE(17:2)	Cholesterol Esters	8	5	7.88957	1.40318	5.62265	0.349845	0.760009	0.132039	0.178485
AC(16:1)	Acylcarnitines	8	9	0.00472559	0.00085764	5.50999	1	1	0.0184243	0.0309759
PC(30:0)	Phosphatidylcholines	10	9	14.7994	2.71182	5.45737	1	1	2.16502e-05	9.87101e-05
PC(33:3)	Phosphatidylcholines	10	10	22.0367	4.06919	5.41551			1.08251e-05	5.29445e-05
SM(31:0)	Sphingomyelins	9	10	2.81174	0.526156	5.34393	1	1	0.00150469	0.00316219
AC(14:2)	Acylcarnitines	10	9	0.0141473	0.00265706	5.32442	1	1	1.08251e-05	5.29445e-05
PC-O(31:3)	Phosphatidylcholines	7	7	0.0778843	0.0149	5.22713	1	1	0.0624716	0.0892129
PC-O(44:3)	Phosphatidylcholines	10	9	7.0851	1.35827	5.21626	1	1	0.000768539	0.00176698
PC(40:5)	Phosphatidylcholines	5	7	1.01601	0.196404	5.17307	0.649917	1	0.639358	0.687949
PC-O(40:3)	Phosphatidylcholines	6	6	0.0786346	0.0152505	5.15621	1	1	0.167659	0.217876
PC(33:5)	Phosphatidylcholines	10	10	5.38702	1.05664	5.09827			1.08251e-05	5.29445e-05
AC(12:0-DC)	Acylcarnitines	9	10	0.00527977	0.0010377	5.08797	1	1	0.00388621	0.00763058
PC(44:7)	Phosphatidylcholines	10	10	10.4914	2.08139	5.04059			1.08251e-05	5.29445e-05
PC-O(42:2)	Phosphatidylcholines	10	10	0.307847	0.0625066	4.92502			0.0113297	0.0203179
PC(42:0)	Phosphatidylcholines	9	10	5.73195	1.17659	4.87166	1	1	0.00579536	0.0109018
PC(46:1)	Phosphatidylcholines	10	10	0.226834	0.0467953	4.84737			1.08251e-05	5.29445e-05
TG(52:7)	Triglycerides	10	9	1.33898	0.281655	4.75396	1	1	0.0524259	0.0766444
Total Acylcarnitines	Acylcarnitines	10	10	1.07806	0.228209	4.72402			0.000205677	0.000581395
PC(27:1)	Phosphatidylcholines	10	10	0.61386	0.129947	4.72393			1.08251e-05	5.29445e-05
TG(54:6)	Triglycerides	10	10	1.25095	0.26566	4.70882			7.57756e-05	0.000291195
PC(29:2)	Phosphatidylcholines	10	10	3.3572	0.716863	4.68318			2.16502e-05	9.87101e-05
SM(36:0)	Sphingomyelins	10	10	12.9508	2.77137	4.67307			1.08251e-05	5.29445e-05
PC(33:0)	Phosphatidylcholines	10	10	7.5593	1.6494	4.58305			1.08251e-05	5.29445e-05
TG(55:6)	Triglycerides	10	10	1.17037	0.270761	4.32253			1.08251e-05	5.29445e-05
PC-O(34:2)	Phosphatidylcholines	10	10	6.36484	1.52189	4.1822			1.08251e-05	5.29445e-05
SM(43:2)	Sphingomyelins	10	10	4.76342	1.15302	4.13125			1.08251e-05	5.29445e-05
PC(39:2)	Phosphatidylcholines	10	10	2.45496	0.599322	4.09623			0.000725281	0.00169653
SM(32:2)	Sphingomyelins	10	10	8.50734	2.12	4.0129			1.08251e-05	5.29445e-05
PC(39:5)	Phosphatidylcholines	10	10	3.9422	1.00422	3.92563			1.08251e-05	5.29445e-05
PC(33:1)	Phosphatidylcholines	10	10	13.8826	3.62872	3.82577			1.08251e-05	5.29445e-05
PC(25:0)	Phosphatidylcholines	9	10	0.54643	0.144417	3.78369	1	1	0.00150469	0.00316219
PC(38:2)	Phosphatidylcholines	10	10	4.52351	1.21733	3.71591			7.57756e-05	0.000291195
PC(35:5)	Phosphatidylcholines	10	10	12.5977	3.42138	3.68207			1.08251e-05	5.29445e-05
PC-O(33:6)	Phosphatidylcholines	10	10	1.31974	0.361679	3.64892			1.08251e-05	5.29445e-05
LPC(20:1)	Lyso-phosphatidylcholines	7	8	0.403259	0.112215	3.59362	1	1	0.139828	0.184318
PC-O(32:3)	Phosphatidylcholines	7	9	0.0679563	0.0189276	3.59033	0.582043	0.997789	0.490745	0.550043
TG(50:4)	Triglycerides	10	10	2.00075	0.55849	3.58243			1.08251e-05	5.29445e-05
DG(44:3)	Diglycerides	10	10	0.353695	0.101104	3.49832			0.000324753	0.000821542
PC-O(42:4)	Phosphatidylcholines	6	7	0.0359412	0.0106779	3.36595	1	1	0.268462	0.32941
PC(24:0)	Phosphatidylcholines	10	10	0.871677	0.261884	3.32849			1.08251e-05	5.29445e-05
SM(44:2)	Sphingomyelins	10	10	7.7769	2.37098	3.28004			4.33004e-05	0.000190947
PC(30:3)	Phosphatidylcholines	10	10	0.934049	0.288243	3.24049			0.00519604	0.00991302
PC(34:5)	Phosphatidylcholines	10	10	26.0203	8.21868	3.16599			1.08251e-05	5.29445e-05
PC(41:2)	Phosphatidylcholines	10	9	2.19568	0.702733	3.12448	1	1	0.0211339	0.0344547
PC(32:1)	Phosphatidylcholines	10	10	10.6294	3.5591	2.98654			1.08251e-05	5.29445e-05
Total Cholesterol Esters	Cholesterol Esters	10	10	133.125	45.5084	2.92529			1.08251e-05	5.29445e-05
PC-O(34:0)	Phosphatidylcholines	6	9	0.0633917	0.0217179	2.91886	0.303406	0.714563	0.388772	0.452726
PC-O(40:6)	Phosphatidylcholines	7	10	2.48276	0.85483	2.90439	0.210526	0.535885	0.139868	0.184318
PC(37:0)	Phosphatidylcholines	10	8	5.38713	1.87507	2.87303	0.473684	0.858766	0.000181651	0.000531132
PC(42:1)	Phosphatidylcholines	10	10	0.0920213	0.0327381	2.81083			0.0211339	0.0344547
PC-O(34:4)	Phosphatidylcholines	10	10	4.54938	1.62062	2.80719			0.970512	0.970512
TG(51:3)	Triglycerides	10	10	0.0258838	0.00979793	2.64176			0.0524259	0.0766444
PC(39:1)	Phosphatidylcholines	7	8	0.0441479	0.0168148	2.62554	1	1	0.086709	0.119614
TG(44:2)	Triglycerides	10	10	0.382876	0.147219	2.60072			0.00105003	0.00235383
LPC(20:3)	Lyso-phosphatidylcholines	6	7	1.95285	0.809983	2.41097	1	1	0.569594	0.630539
PC-O(26:0)	Phosphatidylcholines	10	10	0.151328	0.06469	2.33927			0.0232306	0.0374194
TG(54:4)	Triglycerides	10	10	1.25402	0.561762	2.2323			0.000324753	0.000821542
CE(18:1)	Cholesterol Esters	6	8	1.13115	0.517057	2.18767	0.628483	1	0.788602	0.826664
PEA	Biogenic Amines	6	9	0.0271044	0.0124803	2.17177	0.303406	0.714563	0.627465	0.677864
PC(40:4)	Phosphatidylcholines	10	10	3.66557	1.71837	2.13316			0.000205677	0.000581395
PC(44:10)	Phosphatidylcholines	10	10	0.585829	0.281514	2.081			0.217563	0.276058
SM(40:2)	Sphingomyelins	10	10	7.56961	3.67471	2.05992			0.00579536	0.0109018
SM(41:2)	Sphingomyelins	10	10	3.73301	1.83154	2.03818			0.000329839	0.000821542
PC(33:2)	Phosphatidylcholines	10	10	0.0884192	0.0446351	1.98093			0.393048	0.455733
Cer(41:1)	Ceramides	6	7	0.19797	0.100099	1.97774	1	1	0.424636	0.487188
Total Triglycerides	Triglycerides	10	10	21.0781	11.0478	1.9079			0.000725281	0.00169653
TG(49:1)	Triglycerides	10	10	0.157412	0.0841007	1.8717			0.247451	0.308168
PC(33:4)	Phosphatidylcholines	10	10	0.908054	0.522107	1.73921			0.190316	0.243786
TG(54:3)	Triglycerides	10	10	0.430013	0.255669	1.68191			0.190316	0.243786
CE(18:2)	Cholesterol Esters	10	10	33.2119	21.138	1.57119			0.140465	0.184318
TG(44:4)	Triglycerides	6	7	0.0183542	0.0117985	1.55564	1	1	0.621955	0.674621
LPC(24:0)	Lyso-phosphatidylcholines	5	6	0.201967	0.130505	1.54758	1	1	0.606453	0.660469
SM(36:2)	Sphingomyelins	9	10	0.475117	0.310681	1.52928	1	1	0.307489	0.370918
TG(48:1)	Triglycerides	9	10	0.465272	0.305204	1.52446	1	1	0.0630128	0.0892129
PC(46:2)	Phosphatidylcholines	9	9	0.862184	0.586943	1.46894	1	1	0.324385	0.382717
TG(48:2)	Triglycerides	10	10	0.414494	0.283068	1.46429			0.247451	0.308168
TG(54:5)	Triglycerides	7	10	0.579795	0.400708	1.44693	0.210526	0.535885	0.435049	0.495883
TG(52:2)	Triglycerides	10	10	1.15396	0.84575	1.36442			0.853428	0.88297
TG(50:2)	Triglycerides	9	10	1.13068	0.833472	1.3566	1	1	0.314999	0.374933
Total Sphingomyelins	Sphingomyelins	10	10	61.858	45.8296	1.34974			0.0146896	0.0253809
TG(52:4)	Triglycerides	8	10	1.32011	0.988947	1.33486	0.473684	0.858766	0.423661	0.487188
PC(32:0)	Phosphatidylcholines	9	10	3.65199	2.80838	1.30039	1	1	0.0524259	0.0766444
PC(37:2)	Phosphatidylcholines	7	9	0.868484	0.675811	1.2851	0.582043	0.997789	0.595314	0.650974
PC(37:4)	Phosphatidylcholines	9	10	1.7352	1.3573	1.27841	1	1	0.344704	0.403154
SM(38:3)	Sphingomyelins	5	6	0.0530283	0.0435973	1.21632	1	1	0.662917	0.710456
SM(34:2)	Sphingomyelins	10	10	0.14186	0.118933	1.19278			0.970512	0.970512
TG(52:3)	Triglycerides	10	10	1.67973	1.4291	1.17538			0.795936	0.829872
PC(40:3)	Phosphatidylcholines	6	10	0.0491211	0.0438302	1.12071	0.0866873	0.291269	0.899197	0.926758
PC-O(36:3)	Phosphatidylcholines	10	10	0.9554	0.8553	1.11704			0.970512	0.970512
PC-O(38:6)	Phosphatidylcholines	8	10	1.17177	1.07919	1.08579	0.473684	0.858766	0.850051	0.882872
PC(37:1)	Phosphatidylcholines	5	8	0.0166756	0.0155405	1.07304	0.349845	0.760009	0.728168	0.774218
PC(34:3)	Phosphatidylcholines	10	10	8.30477	8.17134	1.01633			0.314999	0.374933
TG(50:3)	Triglycerides	7	10	0.684773	0.680739	1.00593	0.210526	0.535885	0.911548	0.929066
AC(4:0-DC)	Acylcarnitines	0	4	0	0	1	0.0866873	0.291269
AC(5:0-DC)	Acylcarnitines	0	3	0	0	1	0.210526	0.535885
AC(6:0-OH)	Acylcarnitines	2	1	0	0	1	1	1
AC(10:0)	Acylcarnitines	0	1	0	0	1	1	1
AC(14:0-OH)	Acylcarnitines	1	3	0	0	1	0.582043	0.997789
AC(14:1)	Acylcarnitines	1	2	0	0	1	1	1
AC(16:0)	Acylcarnitines	0	1	0	0	1	1	1
AC(16:1-OH)	Acylcarnitines	0	2	0	0	1	0.473684	0.858766
AC(16:2)	Acylcarnitines	1	4	0	0	1	0.303406	0.714563
AC(17:0)	Acylcarnitines	1	2	0	0	1	1	1
AC(18:0)	Acylcarnitines	4	1	0	0	1	0.303406	0.714563
CE(16:0)	Cholesterol Esters	2	3	0	0	1	1	1
CE(17:1)	Cholesterol Esters	3	2	0	0	1	1	1
CE(19:3)	Cholesterol Esters	1	4	0	0	1	0.303406	0.714563
CE(20:5)	Cholesterol Esters	1	3	0	0	1	0.582043	0.997789
DG(41:1)	Diglycerides	1	3	0	0	1	0.582043	0.997789
DG(42:0)	Diglycerides	3	2	0	0	1	1	1
TG(51:5)	Triglycerides	2	0	0	0	1	0.473684	0.858766
TG(53:5)	Triglycerides	1	2	0	0	1	1	1
TG(55:7)	Triglycerides	0	4	0	0	1	0.0866873	0.291269
TG(56:7)	Triglycerides	1	4	0	0	1	0.303406	0.714563
LPC(14:0)	Lyso-phosphatidylcholines	4	4	0	0	1	1	1
LPC(15:0)	Lyso-phosphatidylcholines	0	3	0	0	1	0.210526	0.535885
LPC(16:1)	Lyso-phosphatidylcholines	2	3	0	0	1	1	1
LPC(17:0)	Lyso-phosphatidylcholines	2	1	0	0	1	1	1
LPC(18:2)	Lyso-phosphatidylcholines	0	4	0	0	1	0.0866873	0.291269
LPC(20:0)	Lyso-phosphatidylcholines	2	2	0	0	1	1	1
LPC(20:2)	Lyso-phosphatidylcholines	1	0	0	0	1	1	1
LPC(22:6)	Lyso-phosphatidylcholines	4	4	0	0	1	1	1
LPC(24:1)	Lyso-phosphatidylcholines	1	3	0	0	1	0.582043	0.997789
LPC-O(17:1)	Lyso-phosphatidylcholines	2	0	0	0	1	0.473684	0.858766
LPC-O(18:1)	Lyso-phosphatidylcholines	2	4	0	0	1	0.628483	1
PC(29:0)	Phosphatidylcholines	2	2	0	0	1	1	1
PC(29:1)	Phosphatidylcholines	3	0	0	0	1	0.210526	0.535885
PC(31:0)	Phosphatidylcholines	0	3	0	0	1	0.210526	0.535885
PC(31:1)	Phosphatidylcholines	0	3	0	0	1	0.210526	0.535885
PC(32:4)	Phosphatidylcholines	0	3	0	0	1	0.210526	0.535885
PC(32:6)	Phosphatidylcholines	2	2	0	0	1	1	1
PC(35:0)	Phosphatidylcholines	3	2	0	0	1	1	1
PC(40:1)	Phosphatidylcholines	2	3	0	0	1	1	1
PC(41:1)	Phosphatidylcholines	2	2	0	0	1	1	1
PC(42:6)	Phosphatidylcholines	4	1	0	0	1	0.303406	0.714563
PC(43:6)	Phosphatidylcholines	0	2	0	0	1	0.473684	0.858766
PC(44:1)	Phosphatidylcholines	4	3	0	0	1	1	1
PC(44:6)	Phosphatidylcholines	2	0	0	0	1	0.473684	0.858766
PC-O(28:1)	Phosphatidylcholines	1	2	0	0	1	1	1
PC-O(32:2)	Phosphatidylcholines	0	2	0	0	1	0.473684	0.858766
PC-O(33:0)	Phosphatidylcholines	4	3	0	0	1	1	1
PC-O(33:4)	Phosphatidylcholines	3	2	0	0	1	1	1
PC-O(36:0)	Phosphatidylcholines	4	2	0	0	1	0.628483	1
PC-O(36:1)	Phosphatidylcholines	2	2	0	0	1	1	1
PC-O(37:7)	Phosphatidylcholines	1	2	0	0	1	1	1
PC-O(38:0)	Phosphatidylcholines	2	2	0	0	1	1	1
PC-O(38:1)	Phosphatidylcholines	3	1	0	0	1	0.582043	0.997789
PC-O(38:2)	Phosphatidylcholines	4	2	0	0	1	0.628483	1
PC-O(40:5)	Phosphatidylcholines	0	2	0	0	1	0.473684	0.858766
PC-O(42:5)	Phosphatidylcholines	4	1	0	0	1	0.303406	0.714563
PC-O(42:6)	Phosphatidylcholines	4	2	0	0	1	0.628483	1
PC-O(44:5)	Phosphatidylcholines	1	0	0	0	1	1	1
Cer(38:1)	Ceramides	3	0	0	0	1	0.210526	0.535885
Cer(40:1)	Ceramides	2	2	0	0	1	1	1
Cer(43:1)	Ceramides	3	0	0	0	1	0.210526	0.535885
Cer(44:0)	Ceramides	3	3	0	0	1	1	1
Met	Aminoacids	1	0	0	0	1	1	1
Thr	Aminoacids	2	0	0	0	1	0.473684	0.858766
Sarcosine	Biogenic Amines	0	4	0	0	1	0.0866873	0.291269
Total Phosphatidylcholines	Phosphatidylcholines	10	10	740.354	847.785	0.873281			0.000205677	0.000581395
SM(42:3)	Sphingomyelins	6	10	1.0871	1.25332	0.867379	0.0866873	0.291269	0.42561	0.487188
Cer(42:1)	Ceramides	6	10	0.103638	0.120769	0.858154	0.0866873	0.291269	0.21057	0.268452
PC(41:4)	Phosphatidylcholines	5	10	0.299709	0.368203	0.813978	0.0325077	0.157538	0.789787	0.826664
LPC(16:0)	Lyso-phosphatidylcholines	9	10	2.93979	3.63776	0.808131	1	1	0.190316	0.243786
Total Lyso-phosphatidylcholines	Lyso-phosphatidylcholines	10	10	17.6265	23.6355	0.745766			0.0630128	0.0892129
PC(42:7)	Phosphatidylcholines	9	10	0.912527	1.28145	0.712105	1	1	0.578742	0.638039
TG(50:1)	Triglycerides	6	10	0.346343	0.492523	0.703203	0.0866873	0.291269	0.268321	0.32941
AC(8:1-OH)	Acylcarnitines	10	10	0.0144195	0.0240806	0.598802			0.970512	0.970512
PC-O(31:0)	Phosphatidylcholines	8	10	0.218631	0.365244	0.598588	0.473684	0.858766	0.0181104	0.0308335
LPC(18:0)	Lyso-phosphatidylcholines	8	10	3.47732	6.00831	0.578752	0.473684	0.858766	0.0611617	0.0884544
CE(18:3)	Cholesterol Esters	5	8	0.42356	0.832813	0.508589	0.349845	0.760009	0.786908	0.826664
PC-O(40:8)	Phosphatidylcholines	10	10	2.20587	4.46428	0.494115			0.000329839	0.000821542
SM(39:2)	Sphingomyelins	9	10	0.209972	0.462497	0.453995	1	1	0.273036	0.332338
SM(38:2)	Sphingomyelins	6	10	0.307029	0.839026	0.365935	0.0866873	0.291269	0.00211857	0.0043838
PC(37:3)	Phosphatidylcholines	7	9	0.0376873	0.103781	0.363143	0.582043	0.997789	0.0950518	0.130454
TG(51:2)	Triglycerides	10	9	0.0157112	0.044421	0.353689	1	1	0.911797	0.929066
PC(32:2)	Phosphatidylcholines	10	10	0.168273	0.51902	0.324214			0.00287947	0.00573762
SM(32:1)	Sphingomyelins	5	10	0.192831	0.603278	0.319639	0.0325077	0.157538	0.137472	0.18398
PC(36:3)	Phosphatidylcholines	6	10	4.61707	16.3233	0.282852	0.0866873	0.291269	0.000172654	0.000531132
PC-O(38:5)	Phosphatidylcholines	10	10	0.0812463	0.323203	0.251378			0.00282727	0.00567564
PC(34:1)	Phosphatidylcholines	10	10	5.53061	22.5009	0.245795			1.08251e-05	5.29445e-05
SM(42:1)	Sphingomyelins	10	10	0.548043	2.24742	0.243854			0.00131494	0.00289935
TG(51:4)	Triglycerides	10	10	0.0241623	0.112749	0.214302			0.314999	0.374933
SM(42:2)	Sphingomyelins	7	10	0.926737	4.34467	0.213304	0.210526	0.535885	0.000178614	0.000531132
SM(43:1)	Sphingomyelins	8	10	0.109529	0.528993	0.207051	0.473684	0.858766	0.140316	0.184318
PC-O(36:6)	Phosphatidylcholines	6	10	0.544013	2.64084	0.206	0.0866873	0.291269	0.000172654	0.000531132
PC(40:7)	Phosphatidylcholines	10	10	6.62513	32.6208	0.203095			1.08251e-05	5.29445e-05
PC(35:2)	Phosphatidylcholines	6	10	0.0364911	0.189751	0.19231	0.0866873	0.291269	0.000692806	0.00166397
TG(52:6)	Triglycerides	8	9	0.0271131	0.145421	0.186445	1	1	0.738931	0.782569
DG(34:1)	Diglycerides	10	10	1.2319	7.28966	0.168993			1.08251e-05	5.29445e-05
SM(40:4)	Sphingomyelins	10	10	0.576329	3.43295	0.167882			0.0211339	0.0344547
LPC(20:4)	Lyso-phosphatidylcholines	5	10	0.24469	1.4752	0.165869	0.0325077	0.157538	0.237762	0.298869
PC(36:2)	Phosphatidylcholines	10	10	3.66027	23.5864	0.155186			1.08251e-05	5.29445e-05
TG(46:2)	Triglycerides	8	9	0.0296612	0.191645	0.154772	1	1	0.480342	0.540636
DG(36:4)	Diglycerides	10	10	0.342299	2.23783	0.15296			1.08251e-05	5.29445e-05
DG(34:3)	Diglycerides	9	10	0.258707	1.70602	0.151644	1	1	4.33004e-05	0.000190947
SM(41:1)	Sphingomyelins	8	10	0.195891	1.30526	0.150078	0.473684	0.858766	0.10398	0.141265
TG(52:5)	Triglycerides	5	10	0.0292919	0.21631	0.135417	0.0325077	0.157538	0.062026	0.0892129
PC(38:5)	Phosphatidylcholines	9	10	12.0358	94.0209	0.128011	1	1	1.08251e-05	5.29445e-05
DG(36:3)	Diglycerides	10	10	0.624728	5.0933	0.122657			1.08251e-05	5.29445e-05
PC(36:5)	Phosphatidylcholines	10	10	19.8956	162.31	0.122578			1.08251e-05	5.29445e-05
PC(34:2)	Phosphatidylcholines	10	10	6.21166	52.5219	0.118268			1.08251e-05	5.29445e-05
Total Diglycerides	Diglycerides	10	10	3.12671	27.0183	0.115726			1.08251e-05	5.29445e-05
PC-O(34:3)	Phosphatidylcholines	10	10	0.151962	1.49084	0.10193			0.0288056	0.045314
PC(38:7)	Phosphatidylcholines	9	10	5.60776	55.4627	0.101109	1	1	1.08251e-05	5.29445e-05
DG(32:1)	Diglycerides	5	10	0.196774	2.14079	0.0919164	0.0325077	0.157538	0.000454654	0.00111183
PC(39:4)	Phosphatidylcholines	5	10	0.0440771	0.486082	0.0906783	0.0325077	0.157538	0.0299477	0.0465661
SM(39:1)	Sphingomyelins	6	10	0.0678096	0.756496	0.0896365	0.0866873	0.291269	0.00348541	0.00689393
PC(35:4)	Phosphatidylcholines	9	10	0.0456984	0.526438	0.0868069	1	1	2.16502e-05	9.87101e-05
PC-O(33:3)	Phosphatidylcholines	7	10	0.0516982	0.613441	0.0842758	0.210526	0.535885	7.57756e-05	0.000291195
PC(38:6)	Phosphatidylcholines	10	10	3.55343	45.027	0.0789176			1.08251e-05	5.29445e-05
PC(32:3)	Phosphatidylcholines	5	8	0.0184827	0.2547	0.0725664	0.349845	0.760009	0.969195	0.970512
PC(35:3)	Phosphatidylcholines	10	10	0.0442206	0.702341	0.0629618			0.0114962	0.0204801
PC-O(36:4)	Phosphatidylcholines	6	10	0.0461381	0.733794	0.062876	0.0866873	0.291269	0.000172654	0.000531132
SM(38:1)	Sphingomyelins	7	10	0.109507	1.9228	0.0569519	0.210526	0.535885	0.103589	0.141265
PC(38:4)	Phosphatidylcholines	6	10	0.879811	19.4449	0.0452463	0.0866873	0.291269	0.000476304	0.00115429
SM(37:1)	Sphingomyelins	5	10	0.0227212	0.618492	0.0367365	0.0325077	0.157538	0.000163049	0.000531132
PC(36:1)	Phosphatidylcholines	10	10	0.124019	4.40566	0.02815			0.000324753	0.000821542
SM(36:1)	Sphingomyelins	7	10	0.0776167	2.90371	0.0267301	0.210526	0.535885	0.000178614	0.000531132
PC(34:4)	Phosphatidylcholines	8	10	0.0893614	4.41295	0.0202498	0.473684	0.858766	7.57756e-05	0.000291195
SM(40:1)	Sphingomyelins	6	10	0.0486447	2.88645	0.0168528	0.0866873	0.291269	0.000233127	0.000620904
PC(40:9)	Phosphatidylcholines	8	10	0.0886062	6.82064	0.0129909	0.473684	0.858766	0.000181651	0.000531132
PC(40:8)	Phosphatidylcholines	10	10	0.109211	12.7359	0.0085751			1.08251e-05	5.29445e-05
PC-O(36:5)	Phosphatidylcholines	5	10	0.0317059	6.02049	0.00526633	0.0325077	0.157538	0.000700291	0.00166707
AC(2:0)	Acylcarnitines	2	5	0	0.00742569	0.001	0.349845	0.760009
AC(6:1)	Acylcarnitines	0	5	0	0.00217939	0.001	0.0325077	0.157538
AC(13:0)	Acylcarnitines	4	6	0	0.000875576	0.001	0.649917	1	0.90357	0.927711
AC(14:1-DC)	Acylcarnitines	0	9	0	0.0274045	0.001	0.000119076	0.00230824	0.000231246	0.000620904
AC(18:1)	Acylcarnitines	0	6	0	0.00730785	0.001	0.0108359	0.0700167	0.00597196	0.0110031
AC(18:1-OH)	Acylcarnitines	4	5	0	0.000176707	0.001	1	1
CE(20:4)	Cholesterol Esters	4	10	0	6.25146	0.001	0.0108359	0.0700167	0.0381801	0.057058
CE(22:6)	Cholesterol Esters	0	7	0	0.648302	0.001	0.00309598	0.026903	0.00221254	0.00447499
DG(32:2)	Diglycerides	1	10	0	0.888229	0.001	0.000119076	0.00230824	0.000228477	0.000620904
DG(36:2)	Diglycerides	1	10	0	4.38028	0.001	0.000119076	0.00230824	8.74499e-05	0.000326722
DG(38:5)	Diglycerides	0	9	0	0.40434	0.001	0.000119076	0.00230824	0.000231246	0.000620904
DG(39:0)	Diglycerides	1	7	0	0.0299584	0.001	0.0197666	0.1186	0.026531	0.0419815
DG(42:1)	Diglycerides	0	6	0	0.0174143	0.001	0.0108359	0.0700167	0.00597196	0.0110031
DG-O(32:2)	Diglycerides	0	8	0	0.16744	0.001	0.000714456	0.0100024	0.000751179	0.00174196
DG-O(34:1)	Diglycerides	4	10	0	0.698918	0.001	0.0108359	0.0700167	0.0040687	0.00787397
DG-O(36:4)	Diglycerides	0	10	0	0.689655	0.001	1e-05	0.000504	6.38644e-05	0.000260296
TG(44:1)	Triglycerides	2	9	0	0.100658	0.001	0.00547749	0.0431353	0.012544	0.0221995
TG(53:3)	Triglycerides	4	5	0	0.00277734	0.001	1	1
TG(54:7)	Triglycerides	1	6	0	0.0930132	0.001	0.0572755	0.262426	0.0565172	0.082179
TG(55:8)	Triglycerides	4	8	0	0.0677904	0.001	0.169802	0.535885	0.558046	0.620308
TG(55:9)	Triglycerides	4	7	0	0.0382711	0.001	0.36985	0.776685	0.721363	0.770027
TG(56:6)	Triglycerides	3	7	0	0.107995	0.001	0.178895	0.535885	0.467275	0.528139
LPC(18:1)	Lyso-phosphatidylcholines	4	10	0	1.88864	0.001	0.0108359	0.0700167	0.000149393	0.000515214
LPC(22:5)	Lyso-phosphatidylcholines	0	7	0	0.541728	0.001	0.00309598	0.026903	0.00221254	0.00447499
PC(31:2)	Phosphatidylcholines	3	10	0	0.127399	0.001	0.00309598	0.026903	0.0822427	0.114945
PC(31:3)	Phosphatidylcholines	3	8	0	0.0326821	0.001	0.0697785	0.291269	0.321852	0.381402
PC(32:5)	Phosphatidylcholines	2	5	0	0.0144812	0.001	0.349845	0.760009
PC(35:1)	Phosphatidylcholines	1	10	0	0.354464	0.001	0.000119076	0.00230824	0.00100549	0.00229217
PC(36:4)	Phosphatidylcholines	3	10	0	87.8613	0.001	0.00309598	0.026903	0.00013173	0.000460198
PC(36:6)	Phosphatidylcholines	2	10	0	2.19948	0.001	0.000714456	0.0100024	0.000207487	0.000581395
PC(37:5)	Phosphatidylcholines	2	10	0	4.05077	0.001	0.000714456	0.0100024	0.000110671	0.000402303
PC(37:7)	Phosphatidylcholines	4	10	0	2.57406	0.001	0.0108359	0.0700167	0.466753	0.528139
PC(38:3)	Phosphatidylcholines	1	10	0	3.37745	0.001	0.000119076	0.00230824	0.000121165	0.00043458
PC(39:3)	Phosphatidylcholines	2	10	0	0.153783	0.001	0.000714456	0.0100024	0.00888805	0.0162645
PC(39:6)	Phosphatidylcholines	0	9	0	0.584473	0.001	0.000119076	0.00230824	0.000231246	0.000620904
PC(39:7)	Phosphatidylcholines	3	10	0	1.62495	0.001	0.00309598	0.026903	0.03367	0.0520531
PC(40:2)	Phosphatidylcholines	3	6	0	0.0106908	0.001	0.36985	0.776685	0.341312	0.40093
PC(40:6)	Phosphatidylcholines	0	10	0	3.20079	0.001	1e-05	0.000504	6.38644e-05	0.000260296
PC(41:5)	Phosphatidylcholines	0	6	0	0.0686079	0.001	0.0108359	0.0700167	0.00597196	0.0110031
PC-O(32:0)	Phosphatidylcholines	3	9	0	0.0834871	0.001	0.0197666	0.1186	0.0049299	0.00947245
PC-O(32:1)	Phosphatidylcholines	0	10	0	0.184402	0.001	1e-05	0.000504	6.38644e-05	0.000260296
PC-O(33:1)	Phosphatidylcholines	3	5	0	0.492206	0.001	0.649917	1
PC-O(34:1)	Phosphatidylcholines	0	10	0	0.742797	0.001	1e-05	0.000504	6.38644e-05	0.000260296
PC-O(35:3)	Phosphatidylcholines	2	9	0	0.0498991	0.001	0.00547749	0.0431353	0.0193896	0.0321963
PC-O(37:6)	Phosphatidylcholines	3	6	0	0.0713115	0.001	0.36985	0.776685	0.590683	0.648546
PC-O(38:3)	Phosphatidylcholines	3	7	0	0.0166638	0.001	0.178895	0.535885	0.29372	0.355905
PC-O(38:4)	Phosphatidylcholines	3	10	0	2.86891	0.001	0.00309598	0.026903	0.0695154	0.0979038
PC-O(40:7)	Phosphatidylcholines	0	10	0	2.34155	0.001	1e-05	0.000504	6.38644e-05	0.000260296
PC-O(44:6)	Phosphatidylcholines	3	5	0	0.00736482	0.001	0.649917	1
SM(33:1)	Sphingomyelins	2	9	0	0.164269	0.001	0.00547749	0.0431353	0.0357115	0.0539686
SM(34:1)	Sphingomyelins	1	10	0	4.80077	0.001	0.000119076	0.00230824	8.74499e-05	0.000326722
SM(35:1)	Sphingomyelins	1	9	0	0.115086	0.001	0.00109333	0.0145011	0.00214621	0.00440711
Gly	Aminoacids	3	6	0	1.62828	0.001	0.36985	0.776685	0.534868	0.59701
